# Supplementary material for: Association between metabolic status and gut microbiome in obese populations
Source: PubMed Central journal article supplement — Microb Genom. 2021 Aug 6;7(8):000639. doi: 10.1099/mgen.0.000639 (PMC8549370; doi:10.1099/mgen.0.000639), 2021-08-06
Supplement: mgen-7-0639-s001.pdf [file mgen-7-0639-s001.pdf]

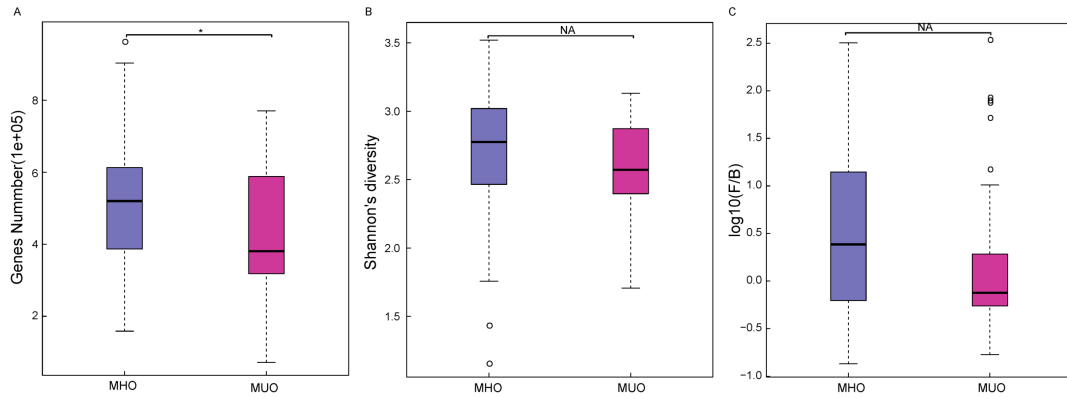

**Fig. S1** Comparison between gut microbiome in metabolically healthy obese (n=172) and metabolically unhealthy obese individuals (n=138) from Quanzhou. (A) Box plot of the gene count in metabolically healthy obese and metabolically unhealthy obese individuals. (B) Shannon diversity; (C) and Firmicutes/Bacteroidetes (F/B) ratio. For A–C, two -tailed Wilcoxon rank-sum test was used to determine significance. Boxes represent the interquartile ranges (IQRs) between the first and third quartiles, and the line inside the box represents the median; whiskers represent the lowest or highest values within 1.5 times IQR from the first or third quartiles.

| Table S1. Sample information |     |     |      |      |     |     |      |      |      |      |      |       |      |           |       |
|------------------------------|-----|-----|------|------|-----|-----|------|------|------|------|------|-------|------|-----------|-------|
| Sample                       | Sex | Age | BMI  | WL   | SBP | DBP | GLU  | TC   | TG   | LDL  | HDL  | UA    | eGFR | Area      | Class |
| 90043605                     | M   | 58  | 27.6 | 95.5 | 114 | 69  | 4.87 | 4.29 | 0.54 | 1.9  | 1.57 | 373.7 | 112  | ChongQing | MHO   |
| DME03088                     | M   | 24  | 26.6 | 91.5 | 141 | 81  | 4.51 | 6.7  | 1.56 | 3.6  | 1.14 | 365   | 126  | ChongQing | MHO   |
| DME03101                     | F   | 42  | 25.4 | 79.2 | 149 | 105 | 5.55 | 4.57 | 1.58 | 2.23 | 1.35 | 350.6 | 152  | ChongQing | MHO   |
| DME03104                     | F   | 49  | 29.3 | 94   | 99  | 68  | 5.35 | 4.25 | 1    | 2.14 | 1.21 | 380.1 | 134  | ChongQing | MHO   |
| DME03106                     | F   | 51  | 25.6 | 83   | 133 | 83  | 4.87 | 6.42 | 0.71 | 3.5  | 1.57 | 258.8 | 102  | ChongQing | MHO   |
| DME03111                     | F   | 27  | 29.5 | 89.6 | 105 | 80  | 5.87 | 4.66 | 1.12 | 2.43 | 1.27 | 399.2 | 136  | ChongQing | MHO   |
| DME03116                     | F   | 51  | 25   | 75   | 106 | 64  | 4.71 | 5.66 | 2.95 | 2.83 | 1.49 | 229.2 | 117  | ChongQing | MHO   |
| DME03140                     | M   | 39  | 25.5 | 90   | 110 | 88  | 5.04 | 5.12 | 2.42 | 2.79 | 1.29 | 341.6 | 111  | ChongQing | MHO   |
| DME03150                     | M   | 52  | 27.9 | 90   | 124 | 79  | 5.73 | 6.1  | 3.52 | 3.33 | 1.14 | 329.5 | 85   | ChongQing | MHO   |
| DME03176                     | M   | 52  | 25.7 | 86.8 | 145 | 101 | 5.21 | 5.08 | 1.21 | 2.62 | 1.42 | 376.2 | 105  | ChongQing | MHO   |
| DME03192                     | M   | 29  | 32.2 | 98.5 | 133 | 78  | 5.08 | 3.52 | 1.55 | 1.77 | 1.08 | 306.7 | 87   | ChongQing | MHO   |
| DME03204                     | F   | 53  | 31.7 | 91   | 167 | 82  | 6.08 | 4.91 | 1.57 | 2.51 | 1.47 | 305.4 | 106  | ChongQing | MHO   |
| DME03209                     | F   | 60  | 26.2 | 93   | 123 | 60  | 5.28 | 5.3  | 1.41 | 2.47 | 1.93 | 175.3 | 89   | ChongQing | MHO   |
| DME03219                     | F   | 44  | 26.4 | 85   | 164 | 108 | 5.69 | 4.33 | 1.39 | 2.3  | 1.15 | 301.6 | 129  | ChongQing | MHO   |
| DME03228                     | M   | 58  | 26.8 | 89   | 145 | 104 | 5.42 | 6.21 | 1.66 | 3.37 | 1.64 | 351.7 | 102  | ChongQing | MHO   |
| DME03244                     | M   | 48  | 26.3 | 85.6 | 116 | 79  | 5.51 | 3.66 | 1.47 | 1.93 | 0.95 | 378.8 | 165  | ChongQing | MHO   |
| DME03246                     | M   | 31  | 28.1 | 95.2 | 114 | 81  | 5.29 | 4.89 | 1.59 | 2.49 | 1.23 | 385.9 | 71   | ChongQing | MHO   |
| DME03251-1                   | M   | 48  | 26.8 | 89.6 | 100 | 67  | 5.29 | 5.04 | 4.16 | 2.57 | 1.09 | 379.5 | 129  | ChongQing | MHO   |
| DME03257                     | F   | 39  | 28.8 | 87   | 96  | 64  | 5.1  | 3.98 | 0.83 | 2.09 | 1.24 | 376.9 | 79   | ChongQing | MHO   |
| DME03335                     | F   | 53  | 25.8 | 77   | 135 | 90  | 5.45 | 4.34 | 1.69 | 2.23 | 1.35 | 301.8 | 143  | ChongQing | MHO   |
| DME03336                     | F   | 48  | 25.1 | 76   | 130 | 92  | 5.24 | 5.13 | 0.7  | 1.75 | 2.9  | 287.8 | 97   | ChongQing | MHO   |
| DME03337                     | F   | 50  | 25   | 80   | 130 | 82  | 4.82 | 5.46 | 3.22 | 3.03 | 1.18 | 307.4 | 115  | ChongQing | MHO   |
| DME03339                     | F   | 50  | 26.3 | 93   | 180 | 61  | 4.98 | 4.93 | 0.91 | 2.71 | 1.26 | 381.5 | 124  | ChongQing | MHO   |

|            |   |    |      |       |     |     |      |      |      |      |      |       |     |           |     |
|------------|---|----|------|-------|-----|-----|------|------|------|------|------|-------|-----|-----------|-----|
| DME03341   | F | 45 | 25.8 | 80    | 100 | 72  | 5.14 | 6.32 | 1.89 | 3.54 | 1.35 | 311.6 | 105 | ChongQing | MHO |
| DME03355   | M | 43 | 26   | 90.2  | 115 | 77  | 5.45 | 6.34 | 1.67 | 3.31 | 1.8  | 353.1 | 112 | ChongQing | MHO |
| DME03356   | F | 46 | 25.4 | 80    | 98  | 74  | 4.95 | 4.65 | 1.56 | 2.72 | 0.9  | 351.6 | 125 | ChongQing | MHO |
| DME03361   | M | 50 | 27.2 | 87    | 125 | 88  | 8.1  | 5.87 | 1.24 | 3.11 | 1.39 | 327.5 | 99  | ChongQing | MHO |
| DME03362   | F | 39 | 26.6 | 79.4  | 144 | 86  | 5.22 | 4.82 | 1.66 | 2.62 | 1.05 | 329.1 | 144 | ChongQing | MHO |
| DME03374   | M | 43 | 26   | 87    | 141 | 90  | 5.62 | 4.66 | 1.09 | 2.3  | 1.53 | 304.9 | 118 | ChongQing | MHO |
| DME03381   | M | 54 | 26.7 | 87.4  | 112 | 70  | 7.71 | 4.78 | 0.63 | 2.23 | 1.85 | 296   | 109 | ChongQing | MHO |
| DME03385   | F | 31 | 32.3 | 93    | 102 | 71  | 5.3  | 5.23 | 1.4  | 2.83 | 1.22 | 382.9 | 124 | ChongQing | MHO |
| DME03386   | M | 45 | 27.5 | 87    | 147 | 103 | 5.27 | 3.91 | 1.22 | 1.98 | 1.19 | 364.2 | 110 | ChongQing | MHO |
| DME03393   | M | 36 | 28.6 | 93.6  | 113 | 63  | 5    | 5.46 | 1.59 | 2.85 | 1.36 | 361.5 | 78  | ChongQing | MHO |
| DME03396   | F | 53 | 27.3 | 84    | 150 | 84  | 4.84 | 2.93 | 1.26 | 1.26 | 1.05 | 383   | 116 | ChongQing | MHO |
| DME03414   | M | 43 | 25.6 | 82.1  | 111 | 73  | 5.14 | 5.55 | 1.42 | 2.87 | 1.3  | 370.7 | 80  | ChongQing | MHO |
| DME03471   | F | 34 | 36.6 | 107.5 | 118 | 90  | 5.49 | 4.69 | 1.43 | 2.52 | 1.09 | 383.6 | 124 | ChongQing | MHO |
| DME03480   | M | 50 | 25.6 | 86.6  | 103 | 63  | 5.35 | 4.48 | 1.44 | 2.14 | 1.11 | 366.5 | 81  | ChongQing | MHO |
| DME03483   | F | 45 | 25.6 | 91    | 101 | 70  | 5.64 | 4.97 | 1.27 | 2.58 | 1.33 | 387.4 | 88  | ChongQing | MHO |
| DME03485   | M | 31 | 26.4 | 89.5  | 116 | 78  | 4.92 | 3.83 | 1.48 | 1.91 | 0.9  | 371.9 | 109 | ChongQing | MHO |
| DME03491   | F | 46 | 25.4 | 81    | 121 | 73  | 4.85 | 6.43 | 1.61 | 3.17 | 1.49 | 277.5 | 100 | ChongQing | MHO |
| DME03495   | M | 38 | 25.7 | 87    | 123 | 92  | 5.54 | 3.68 | 1.99 | 1.64 | 1.35 | 346.3 | 111 | ChongQing | MHO |
| DME03499-1 | F | 40 | 28.4 | 84    | 112 | 80  | 4.96 | 3    | 1.58 | 1.38 | 0.91 | 226.7 | 129 | ChongQing | MHO |
| DME03514   | F | 43 | 28.6 | 91.5  | 113 | 80  | 5.96 | 4.55 | 1.39 | 2.17 | 1.26 | 399.3 | 140 | ChongQing | MHO |
| DME03515   | F | 39 | 26.6 | 83    | 110 | 75  | 4.9  | 3.7  | 1.41 | 1.82 | 0.95 | 337.5 | 127 | ChongQing | MHO |
| DME03519   | F | 51 | 25.7 | 84.3  | 118 | 66  | 4.98 | 4.78 | 1.29 | 2.46 | 1.35 | 220.4 | 86  | ChongQing | MHO |
| DME03534   | M | 45 | 29.1 | 96    | 119 | 82  | 5.98 | 5.3  | 1.22 | 2.83 | 1.29 | 384.9 | 83  | ChongQing | MHO |
| DME03538   | F | 42 | 31.2 | 94.5  | 102 | 62  | 5.54 | 4.29 | 1.08 | 2.17 | 1.17 | 359.6 | 111 | ChongQing | MHO |
| DME03892   | F | 50 | 25.2 | 87.2  | 140 | 80  | 5.63 | 4.65 | 1.6  | 2.08 | 1.73 | 232   | 122 | ChongQing | MHO |

|            |   |    |      |       |     |    |      |      |      |      |      |       |     |           |     |
|------------|---|----|------|-------|-----|----|------|------|------|------|------|-------|-----|-----------|-----|
| DME03894   | F | 49 | 35.5 | 107.5 | 113 | 78 | 5.61 | 6.91 | 1.67 | 3.57 | 1.54 | 287.4 | 112 | ChongQing | MHO |
| DME03903   | F | 64 | 25.7 | 93.5  | 119 | 71 | 5.56 | 5.7  | 0.93 | 2.91 | 1.73 | 299.3 | 96  | ChongQing | MHO |
| DME03908   | M | 58 | 25.4 | 84    | 114 | 76 | 5.17 | 4    | 1.09 | 2.08 | 0.98 | 322.1 | 97  | ChongQing | MHO |
| DME03910   | F | 45 | 27.1 | 81.6  | 121 | 72 | 5.17 | 5.12 | 1.44 | 2.64 | 1.13 | 301.6 | 126 | ChongQing | MHO |
| DME03923   | F | 49 | 27   | 86.2  | 109 | 67 | 5.13 | 4.96 | 0.72 | 2.2  | 1.86 | 202.8 | 126 | ChongQing | MHO |
| DME03925   | M | 25 | 31.5 | 105.2 | 120 | 74 | 4.96 | 4.04 | 0.68 | 1.89 | 1.31 | 363.1 | 142 | ChongQing | MHO |
| DME03943   | F | 44 | 25.2 | 88.2  | 114 | 82 | 5.75 | 5.09 | 1.41 | 2.67 | 1.41 | 298.3 | 95  | ChongQing | MHO |
| DME03944   | M | 46 | 27.4 | 98    | 127 | 86 | 5.18 | 4.18 | 1.37 | 2.1  | 1.29 | 262.9 | 99  | ChongQing | MHO |
| DME03953   | F | 49 | 25   | 80    | 145 | 94 | 5.92 | 5.74 | 1.36 | 2.85 | 1.65 | 244.3 | 126 | ChongQing | MHO |
| DME03959   | F | 47 | 27.9 | 92    | 125 | 78 | 5.84 | 5.51 | 0.76 | 2.69 | 1.77 | 240.5 | 100 | ChongQing | MHO |
| DME03961   | F | 62 | 29.6 | 85    | 133 | 79 | 5.29 | 5.95 | 1.4  | 3.18 | 1.33 | 317.8 | 78  | ChongQing | MHO |
| DME03969   | F | 52 | 27.2 | 88.2  | 122 | 76 | 5.3  | 5.5  | 1.6  | 2.96 | 1.34 | 248.2 | 134 | ChongQing | MHO |
| DME04006   | M | 43 | 27.4 | 89    | 114 | 69 | 5.57 | 5.65 | 1.55 | 3.24 | 1.07 | 290   | 107 | ChongQing | MHO |
| DME04011   | F | 52 | 25.9 | 81    | 121 | 79 | 5.39 | 6.6  | 1.88 | 3.64 | 1.33 | 296.9 | 106 | ChongQing | MHO |
| DME04024   | F | 42 | 26.4 | 85.2  | 132 | 82 | 5.14 | 4.05 | 0.94 | 2.08 | 1.12 | 307.8 | 125 | ChongQing | MHO |
| DME04705-w | M | 53 | 27.8 | 97.1  | 131 | 75 | 5.97 | 5.22 | 0.89 | 2.36 | 1.86 | 311.2 | 129 | ChongQing | MHO |
| DME04706   | F | 30 | 27.1 | 89.2  | 109 | 78 | 5.47 | 3.67 | 0.47 | 1.75 | 1.36 | 285.2 | 144 | ChongQing | MHO |
| DME04711   | M | 45 | 25.6 | 86    | 107 | 82 | 5.19 | 5.88 | 1.7  | 3.24 | 1.11 | 343.9 | 81  | ChongQing | MHO |
| DME04712   | F | 57 | 28.7 | 96.8  | 122 | 80 | 5.35 | 5.79 | 1.12 | 3.07 | 1.55 | 286.5 | 135 | ChongQing | MHO |
| DME04715   | F | 28 | 28.1 | 83    | 114 | 81 | 5.14 | 5.1  | 1.7  | 2.52 | 1.4  | 312.9 | 126 | ChongQing | MHO |
| DME04717   | F | 49 | 26.7 | 84.8  | 144 | 80 | 5.13 | 5.2  | 3.1  | 2.6  | 1.14 | 343.9 | 111 | ChongQing | MHO |
| DME04722   | F | 55 | 26.1 | 85.1  | 116 | 60 | 5.18 | 4.87 | 1.02 | 2.45 | 1.26 | 333.4 | 126 | ChongQing | MHO |
| DME04752   | F | 33 | 27.8 | 87.2  | 120 | 74 | 4.32 | 4.41 | 1.45 | 2.03 | 1.43 | 261.7 | 128 | ChongQing | MHO |
| DME04753   | F | 43 | 27.6 | 84    | 112 | 78 | 5.78 | 6.07 | 0.87 | 2.92 | 1.89 | 386.9 | 146 | ChongQing | MHO |
| DME04756   | F | 33 | 30.4 | 88.2  | 123 | 71 | 5.48 | 4.57 | 1.35 | 2.24 | 1.22 | 369   | 123 | ChongQing | MHO |

|          |   |    |      |       |     |    |      |      |      |      |      |       |     |           |     |
|----------|---|----|------|-------|-----|----|------|------|------|------|------|-------|-----|-----------|-----|
| DME04757 | M | 47 | 25.6 | 90.2  | 117 | 56 | 5.46 | 5.51 | 1.21 | 2.93 | 1.16 | 328.5 | 131 | ChongQing | MHO |
| DME04764 | F | 35 | 27.3 | 86    | 99  | 71 | 5.41 | 3.17 | 0.48 | 1.47 | 1.11 | 269.3 | 115 | ChongQing | MHO |
| DME04767 | F | 48 | 28.3 | 85    | 118 | 70 | 5.99 | 6.07 | 1.74 | 3.01 | 1.42 | 200.5 | 128 | ChongQing | MHO |
| DME04772 | M | 53 | 27.4 | 90    | 117 | 76 | 5.73 | 7.75 | 1.7  | 3.75 | 2.17 | 371.3 | 106 | ChongQing | MHO |
| DME04777 | M | 33 | 29   | 96.1  | 122 | 73 | 4.86 | 6.21 | 1.5  | 3.16 | 1.38 | 368.3 | 137 | ChongQing | MHO |
| DME04792 | F | 45 | 28.9 | 102   | 122 | 73 | 5.18 | 4.36 | 1.53 | 2.05 | 1.31 | 254.6 | 148 | ChongQing | MHO |
| DME04794 | F | 32 | 27.3 | 80.2  | 115 | 72 | 4.88 | 4.95 | 1.53 | 2.4  | 1.33 | 241.6 | 154 | ChongQing | MHO |
| DME04802 | F | 47 | 28.5 | 82.3  | 132 | 91 | 5.81 | 4.76 | 1.33 | 2.19 | 1.69 | 303   | 116 | ChongQing | MHO |
| DME04807 | M | 53 | 28.6 | 96.1  | 132 | 79 | 5.36 | 6.56 | 1.32 | 3.48 | 1.26 | 296.3 | 116 | ChongQing | MHO |
| DME04809 | F | 28 | 25.4 | 82.6  | 104 | 75 | 5.12 | 4.49 | 0.77 | 2.04 | 1.57 | 228   | 162 | ChongQing | MHO |
| DME04813 | F | 63 | 27.8 | 84.2  | 138 | 74 | 5.83 | 7.01 | 1.14 | 3.37 | 1.47 | 281.7 | 98  | ChongQing | MHO |
| DME04816 | M | 40 | 26.1 | 89    | 112 | 80 | 5.41 | 3.53 | 0.98 | 1.75 | 0.99 | 394.6 | 106 | ChongQing | MHO |
| DME04843 | F | 27 | 29.7 | 92.6  | 119 | 79 | 5.57 | 4.8  | 1.17 | 1.83 | 1.3  | 345.1 | 146 | ChongQing | MHO |
| DME04845 | F | 60 | 33   | 113   | 150 | 82 | 6.04 | 6.14 | 1.09 | 2.35 | 1.63 | 335.9 | 110 | ChongQing | MHO |
| DME04847 | M | 49 | 28.5 | 91.3  | 131 | 82 | 5.43 | 5.42 | 0.85 | 2.23 | 1.19 | 379.3 | 125 | ChongQing | MHO |
| DME04849 | F | 44 | 25.9 | 80.8  | 117 | 77 | 5.32 | 5.55 | 1.37 | 3.08 | 1.29 | 296.2 | 98  | ChongQing | MHO |
| DME04863 | F | 28 | 31.7 | 91.2  | 137 | 83 | 5.04 | 5.14 | 0.94 | 2.53 | 1.57 | 352.5 | 173 | ChongQing | MHO |
| DME04866 | F | 45 | 26.8 | 88.2  | 105 | 62 | 5.58 | 5.98 | 1.23 | 3.04 | 1.34 | 268.4 | 118 | ChongQing | MHO |
| DME04874 | M | 43 | 26.7 | 86    | 115 | 76 | 5.2  | 4.58 | 1.45 | 1.72 | 1.27 | 344.9 | 121 | ChongQing | MHO |
| DME04875 | F | 57 | 27.3 | 94    | 112 | 56 | 5.78 | 3.88 | 0.68 | 1.33 | 1.33 | 298.3 | 130 | ChongQing | MHO |
| DME04878 | F | 44 | 27.1 | 84    | 140 | 94 | 4.72 | 5.01 | 0.78 | 2.36 | 1.7  | 327.5 | 125 | ChongQing | MHO |
| DME04880 | M | 50 | 25.4 | 84    | 157 | 92 | 5.74 | 6.01 | 1.47 | 2.91 | 1.79 | 348.8 | 106 | ChongQing | MHO |
| DME04884 | M | 46 | 26.5 | 95    | 125 | 88 | 5.98 | 5.29 | 1.21 | 2.52 | 1.71 | 308.7 | 121 | ChongQing | MHO |
| DME04890 | F | 48 | 35.3 | 112.6 | 132 | 82 | 5.91 | 4.78 | 1.54 | 2.4  | 1.23 | 298.9 | 127 | ChongQing | MHO |
| DME04900 | F | 29 | 29.5 | 100.4 | 95  | 65 | 5.37 | 3.81 | 0.89 | 1.72 | 1.3  | 364.8 | 125 | ChongQing | MHO |

|            |   |    |      |      |     |     |      |      |      |      |      |       |     |           |     |
|------------|---|----|------|------|-----|-----|------|------|------|------|------|-------|-----|-----------|-----|
| DME04908   | F | 42 | 27   | 88   | 140 | 84  | 5.27 | 5.84 | 0.88 | 2.59 | 2    | 235   | 153 | ChongQing | MHO |
| DME04910   | M | 41 | 26.5 | 88.1 | 106 | 69  | 4.99 | 6.06 | 2.93 | 3.23 | 1.13 | 337.7 | 106 | ChongQing | MHO |
| DME04911   | F | 24 | 25.7 | 88   | 121 | 95  | 4.94 | 5.42 | 1.31 | 2.54 | 1.51 | 375   | 127 | ChongQing | MHO |
| DME04929   | M | 40 | 26.5 | 88.2 | 111 | 78  | 5.65 | 4.96 | 1.65 | 2.06 | 1.1  | 361.2 | 112 | ChongQing | MHO |
| DME05000-W | F | 32 | 27.2 | 89   | 108 | 62  | 5.42 | 5.4  | 0.92 | 2.76 | 1.27 | 311.8 | 138 | ChongQing | MHO |
| DME05003   | M | 46 | 26.7 | 88.1 | 129 | 82  | 5.24 | 4.36 | 1.58 | 2.23 | 1.05 | 373.4 | 127 | ChongQing | MHO |
| DME05007   | F | 31 | 30.1 | 86.6 | 129 | 76  | 5.56 | 6.7  | 1.11 | 3.48 | 1.37 | 374.1 | 127 | ChongQing | MHO |
| DME05011   | F | 46 | 25.5 | 85.3 | 96  | 62  | 5.45 | 5.32 | 0.99 | 2.48 | 1.46 | 216.6 | 161 | ChongQing | MHO |
| DME05024   | F | 23 | 28.2 | 86.2 | 98  | 60  | 5.41 | 4.59 | 0.72 | 2.28 | 1.16 | 378.9 | 154 | ChongQing | MHO |
| DME05082   | F | 34 | 26.1 | 78   | 105 | 79  | 5.27 | 4.73 | 0.91 | 1.54 | 1.6  | 300.4 | 93  | ChongQing | MHO |
| DME05099   | F | 40 | 29.5 | 96   | 122 | 71  | 4.69 | 5.79 | 1.1  | 2.54 | 2.14 | 230.5 | 157 | ChongQing | MHO |
| DME05101   | F | 36 | 25.6 | 84.2 | 114 | 70  | 5.84 | 3.84 | 0.85 | 1.86 | 0.92 | 217.1 | 154 | ChongQing | MHO |
| DME05111   | F | 29 | 25.7 | 84.2 | 115 | 70  | 5.19 | 3.71 | 0.65 | 1.32 | 1.91 | 313.3 | 145 | ChongQing | MHO |
| DME05113   | M | 41 | 28.5 | 88.8 | 125 | 88  | 5.5  | 5.9  | 3.15 | 3.12 | 1.11 | 261.3 | 100 | ChongQing | MHO |
| DME05114   | F | 58 | 25.9 | 84.5 | 116 | 74  | 5.22 | 6.66 | 1.7  | 3.51 | 1.39 | 259.1 | 93  | ChongQing | MHO |
| DME05267   | M | 45 | 33.3 | 87   | 132 | 81  | 5.69 | 6.32 | 3.18 | 3.26 | 1.43 | 362.4 | 144 | ChongQing | MHO |
| DME05321   | F | 53 | 26.4 | 78.1 | 106 | 68  | 5.72 | 6.62 | 1.25 | 3.32 | 1.52 | 327.2 | 92  | ChongQing | MHO |
| DME05322   | F | 41 | 27.6 | 82.1 | 95  | 65  | 5.21 | 3.74 | 0.9  | 1.55 | 1.57 | 361.5 | 138 | ChongQing | MHO |
| DME05323   | M | 34 | 26.8 | 93   | 111 | 81  | 4.59 | 4.74 | 1.28 | 2.4  | 1.13 | 324.8 | 98  | ChongQing | MHO |
| DME05330   | F | 41 | 28.1 | 89.4 | 126 | 90  | 6.03 | 5.35 | 0.9  | 2.5  | 1.64 | 247.1 | 171 | ChongQing | MHO |
| DME05333   | F | 36 | 27.6 | 83   | 145 | 101 | 4.19 | 5.4  | 1.26 | 2.53 | 1.51 | 344.4 | 132 | ChongQing | MHO |
| DME05340   | F | 51 | 26   | 84   | 124 | 82  | 5.79 | 5.58 | 2.22 | 2.29 | 2.33 | 378.8 | 105 | ChongQing | MHO |
| DME05475   | M | 44 | 27   | 89   | 106 | 70  | 6.08 | 4.41 | 2.73 | 2.12 | 1.32 | 397.2 | 102 | ChongQing | MHO |
| DME05493   | M | 51 | 25.2 | 87.2 | 142 | 94  | 5.29 | 4.65 | 0.96 | 2.31 | 1.19 | 275.2 | 120 | ChongQing | MHO |
| DME05506   | F | 49 | 26.5 | 83   | 136 | 84  | 5.94 | 5.27 | 5.13 | 2.48 | 1.05 | 357   | 127 | ChongQing | MHO |

|          |   |    |      |       |     |     |      |      |      |      |      |       |     |           |     |
|----------|---|----|------|-------|-----|-----|------|------|------|------|------|-------|-----|-----------|-----|
| DME05510 | F | 53 | 25.6 | 79.4  | 141 | 80  | 5.85 | 5.81 | 2.27 | 2.87 | 1.31 | 343.8 | 91  | ChongQing | MHO |
| DME05517 | M | 59 | 27.9 | 99.2  | 114 | 65  | 6.09 | 7.03 | 1.24 | 3.35 | 2.07 | 303.2 | 100 | ChongQing | MHO |
| DME05522 | F | 52 | 25.5 | 80    | 142 | 81  | 5.09 | 5.03 | 1.19 | 2.56 | 1.14 | 225   | 143 | ChongQing | MHO |
| DME05540 | M | 41 | 28.7 | 101.2 | 112 | 79  | 5.55 | 4.36 | 1.52 | 2.7  | 1.08 | 329.7 | 89  | ChongQing | MHO |
| DME05571 | M | 44 | 25.1 | 84.2  | 147 | 97  | 5.94 | 4.85 | 1.4  | 2.44 | 1.2  | 384.8 | 90  | ChongQing | MHO |
| DME05580 | F | 53 | 27.5 | 80    | 125 | 90  | 5.57 | 4.7  | 0.89 | 2.3  | 1.3  | 226.7 | 106 | ChongQing | MHO |
| DME05582 | F | 53 | 26.6 | 88.4  | 122 | 78  | 4.97 | 5.48 | 1.37 | 2.66 | 1.43 | 364.5 | 97  | ChongQing | MHO |
| DME05597 | M | 47 | 27.3 | 90    | 148 | 94  | 5.07 | 4.71 | 0.89 | 2.39 | 1.41 | 268.4 | 123 | ChongQing | MHO |
| DME05715 | F | 50 | 27.2 | 78    | 130 | 82  | 5.99 | 6.44 | 1.65 | 3.17 | 1.48 | 284.9 | 126 | ChongQing | MHO |
| DME05794 | F | 33 | 28   | 98.2  | 114 | 84  | 5.29 | 4.59 | 1.35 | 2.18 | 1.22 | 375.6 | 168 | ChongQing | MHO |
| DME05915 | F | 55 | 30.6 | 82.1  | 140 | 88  | 4.79 | 5.52 | 0.82 | 2.38 | 1.95 | 346.4 | 107 | ChongQing | MHO |
| DME05932 | M | 44 | 27.4 | 90    | 100 | 61  | 5.64 | 4.42 | 1.11 | 2.4  | 0.9  | 364.6 | 109 | ChongQing | MHO |
| DME05936 | F | 61 | 25.4 | 80    | 106 | 72  | 5.23 | 5.55 | 5.54 | 2.63 | 1.17 | 264.9 | 113 | ChongQing | MHO |
| DME05948 | F | 51 | 25.1 | 76.2  | 117 | 74  | 4.98 | 6.45 | 1.52 | 3.04 | 1.61 | 251.1 | 130 | ChongQing | MHO |
| DME05949 | F | 35 | 27.7 | 92    | 119 | 91  | 4.59 | 5.58 | 0.6  | 2.93 | 1.35 | 387.8 | 132 | ChongQing | MHO |
| DME05951 | M | 51 | 25.8 | 85    | 111 | 68  | 6.2  | 6.37 | 1.07 | 3.4  | 1.43 | 343.7 | 95  | ChongQing | MHO |
| DME05960 | F | 60 | 26.6 | 85.5  | 144 | 83  | 4.99 | 5.07 | 1.32 | 2.56 | 1.43 | 176.3 | 148 | ChongQing | MHO |
| DME06157 | F | 31 | 25   | 84.5  | 96  | 58  | 5.05 | 5.48 | 0.46 | 2.71 | 1.71 | 246.1 | 145 | ChongQing | MHO |
| DME06160 | M | 40 | 26.4 | 86.4  | 136 | 105 | 5.59 | 5.81 | 1.63 | 2.9  | 1.38 | 308.7 | 149 | ChongQing | MHO |
| DME06202 | F | 42 | 25   | 92    | 111 | 79  | 4.53 | 5.2  | 0.9  | 2.27 | 1.68 | 232.8 | 139 | ChongQing | MHO |
| DME06210 | F | 41 | 27.6 | 81.3  | 121 | 71  | 7.33 | 4.34 | 1.09 | 2.23 | 1.39 | 253.3 | 196 | ChongQing | MHO |
| DME06211 | F | 41 | 25.5 | 84.4  | 122 | 65  | 4.74 | 4.36 | 0.93 | 2.35 | 1.14 | 231.4 | 107 | ChongQing | MHO |
| DME06217 | F | 40 | 27.1 | 84.2  | 110 | 71  | 5.16 | 5.25 | 1.07 | 2.67 | 1.22 | 289.4 | 102 | ChongQing | MHO |
| DME06218 | F | 47 | 28.4 | 88    | 98  | 66  | 5.74 | 3.53 | 0.64 | 1.58 | 1.15 | 307.7 | 111 | ChongQing | MHO |
| DME06220 | F | 38 | 26.1 | 78.2  | 103 | 71  | 5.26 | 4.87 | 0.64 | 2.4  | 1.54 | 232.9 | 146 | ChongQing | MHO |

|            |   |    |      |       |     |    |      |      |      |      |      |       |     |           |     |
|------------|---|----|------|-------|-----|----|------|------|------|------|------|-------|-----|-----------|-----|
| DME06223   | M | 45 | 26.8 | 96.2  | 124 | 85 | 5.85 | 6.32 | 1.65 | 3.29 | 1.13 | 377.5 | 114 | ChongQing | MHO |
| DME06230   | F | 54 | 28.4 | 91.2  | 138 | 83 | 5.41 | 4.51 | 1.24 | 2.16 | 1.48 | 256.5 | 151 | ChongQing | MHO |
| DME06231   | F | 55 | 25.4 | 73.2  | 120 | 85 | 5.14 | 6.14 | 2.12 | 3.08 | 1.45 | 301.4 | 148 | ChongQing | MHO |
| DME06232   | M | 42 | 29   | 98.9  | 125 | 78 | 5.75 | 6.25 | 1.38 | 3.33 | 1.25 | 393.1 | 134 | ChongQing | MHO |
| DME06233   | M | 37 | 28.4 | 95.2  | 113 | 66 | 6.09 | 5.6  | 1.36 | 2.92 | 1.34 | 372.2 | 127 | ChongQing | MHO |
| DME06234   | M | 45 | 31.5 | 106.3 | 149 | 75 | 4.92 | 5.9  | 1.6  | 3.25 | 1.23 | 368.9 | 104 | ChongQing | MHO |
| DME06243   | F | 36 | 26.6 | 78    | 91  | 51 | 4.72 | 3.51 | 0.81 | 1.69 | 1.28 | 168.5 | 142 | ChongQing | MHO |
| DME06252   | F | 53 | 27   | 82    | 102 | 68 | 5.59 | 6.38 | 2.42 | 3.24 | 1.56 | 354.5 | 93  | ChongQing | MHO |
| DME06268   | M | 34 | 26.9 | 94.2  | 115 | 70 | 5.26 | 4.94 | 1.54 | 2.44 | 1.4  | 352.6 | 136 | ChongQing | MHO |
| DME06288   | M | 45 | 29.4 | 98    | 149 | 84 | 5.8  | 5.16 | 1.68 | 2.73 | 1.39 | 374.3 | 95  | ChongQing | MHO |
| DME06298   | F | 58 | 27.7 | 88    | 129 | 84 | 5.64 | 4.75 | 0.88 | 1.55 | 2.28 | 290.4 | 151 | ChongQing | MHO |
| DME06338   | F | 51 | 25   | 87    | 123 | 94 | 5.99 | 6.51 | 1.15 | 3.4  | 1.83 | 257.8 | 120 | ChongQing | MHO |
| DME06344   | M | 42 | 27   | 90    | 116 | 71 | 5.4  | 4.61 | 1    | 2.34 | 1.22 | 346.9 | 84  | ChongQing | MHO |
| DME06345   | M | 63 | 26   | 88.5  | 139 | 88 | 4.8  | 5.91 | 1.65 | 2.81 | 1.76 | 346.6 | 86  | ChongQing | MHO |
| DME06384-w | F | 50 | 28.3 | 93.4  | 128 | 88 | 5.39 | 6.2  | 1.34 | 2.77 | 1.94 | 248.6 | 102 | ChongQing | MHO |
| DME06449   | F | 46 | 26.2 | 80.4  | 154 | 95 | 4.92 | 5.95 | 1.32 | 3.15 | 1.36 | 354.3 | 115 | ChongQing | MHO |
| DME06463   | F | 36 | 26.4 | 88    | 146 | 81 | 4.97 | 4.82 | 1.43 | 3.76 | 1.34 | 314   | 181 | ChongQing | MHO |
| DME06533   | M | 56 | 26.2 | 90    | 112 | 67 | 5.62 | 5.03 | 1.05 | 2.43 | 1.38 | 320.5 | 86  | ChongQing | MHO |
| DME06539   | M | 53 | 28.3 | 98    | 135 | 64 | 5.22 | 5.07 | 1.33 | 2.63 | 1.27 | 357.3 | 116 | ChongQing | MHO |
| DME06676   | F | 52 | 34.9 | 114   | 117 | 68 | 6.06 | 6.53 | 0.94 | 3.13 | 2.04 | 336.1 | 115 | ChongQing | MHO |
| DME06681   | F | 58 | 29.8 | 88    | 109 | 67 | 5.41 | 5.68 | 1.35 | 2.76 | 1.62 | 238.3 | 109 | ChongQing | MHO |
| DSFP00812  | M | 41 | 25.4 | 90    | 117 | 72 | 5.53 | 5.66 | 2.2  | 2.93 | 1.45 | 366.5 | 95  | ChongQing | MHO |
| DSFP00934  | F | 59 | 28.6 | 84.2  | 152 | 89 | 5.1  | 5.46 | 1.23 | 2.48 | 1.7  | 271.7 | 105 | ChongQing | MHO |
| DSFP00988  | F | 61 | 28.4 | 85    | 140 | 75 | 5.94 | 6.38 | 1.46 | 3.08 | 1.99 | 308.8 | 101 | ChongQing | MHO |
| 90042801   | M | 41 | 27.1 | 96.2  | 112 | 76 | 4.7  | 5.07 | 1.93 | 2.71 | 1    | 466.1 | 139 | ChongQing | MUO |



|            |   |    |      |       |     |     |       |      |       |      |      |       |     |           |     |
|------------|---|----|------|-------|-----|-----|-------|------|-------|------|------|-------|-----|-----------|-----|
| 90043608   | M | 24 | 27.5 | 98.3  | 172 | 113 | 5.71  | 5.39 | 2.74  | 2.79 | 0.97 | 414.3 | 152 | ChongQing | MUO |
| DME03089   | M | 45 | 29.2 | 103.2 | 125 | 76  | 6.17  | 5.3  | 11.84 | 1.92 | 0.65 | 406.7 | 113 | ChongQing | MUO |
| DME03100   | M | 44 | 26.8 | 90.4  | 127 | 77  | 5.76  | 4.95 | 3.09  | 2.61 | 0.91 | 421.5 | 98  | ChongQing | MUO |
| DME03107-w | M | 29 | 35   | 104.5 | 130 | 69  | 5.59  | 4.22 | 2.94  | 2.28 | 0.78 | 672.1 | 147 | ChongQing | MUO |
| DME03110   | M | 61 | 27.9 | 95    | 135 | 86  | 9.05  | 4.81 | 1.45  | 2.52 | 1.26 | 411.6 | 123 | ChongQing | MUO |
| DME03119   | M | 52 | 29.3 | 97.8  | 119 | 69  | 5.25  | 4.37 | 3.14  | 2.27 | 0.95 | 424.2 | 91  | ChongQing | MUO |
| DME03127   | M | 41 | 32.3 | 99.2  | 135 | 76  | 6.79  | 3.41 | 1.86  | 1.89 | 0.68 | 418.6 | 96  | ChongQing | MUO |
| DME03134   | M | 38 | 32.6 | 105   | 117 | 69  | 10.02 | 5.42 | 2.18  | 2.9  | 1.22 | 400.2 | 136 | ChongQing | MUO |
| DME03146   | M | 35 | 38.3 | 125.3 | 127 | 87  | 5.15  | 6.26 | 2.1   | 3.73 | 1.03 | 460.1 | 113 | ChongQing | MUO |
| DME03153   | F | 40 | 36.4 | 105   | 118 | 63  | 5.71  | 4.11 | 2.19  | 2.15 | 1.04 | 425.2 | 119 | ChongQing | MUO |
| DME03157   | M | 43 | 28.6 | 98    | 117 | 86  | 5.75  | 3.93 | 2.44  | 2.25 | 0.86 | 406.8 | 104 | ChongQing | MUO |
| DME03158   | M | 48 | 26.7 | 95    | 113 | 75  | 5.49  | 4.54 | 2.92  | 2.36 | 1.02 | 408.4 | 123 | ChongQing | MUO |
| DME03163   | M | 40 | 29.3 | 98.4  | 111 | 67  | 4.93  | 6.31 | 4.85  | 3.19 | 0.97 | 554.2 | 97  | ChongQing | MUO |
| DME03164   | M | 32 | 34.4 | 103.6 | 134 | 73  | 5.22  | 5.15 | 3.58  | 2.68 | 0.9  | 427.2 | 90  | ChongQing | MUO |
| DME03166   | M | 45 | 26.7 | 94.6  | 144 | 92  | 5.23  | 4.75 | 1.95  | 2.47 | 1.27 | 405.8 | 110 | ChongQing | MUO |
| DME03175   | M | 31 | 28.8 | 98    | 120 | 72  | 5.28  | 4.26 | 4.26  | 2.31 | 0.79 | 496.1 | 101 | ChongQing | MUO |
| DME03186   | M | 42 | 28.8 | 92.5  | 133 | 71  | 5.25  | 3.36 | 3.51  | 1.86 | 0.66 | 543.8 | 96  | ChongQing | MUO |
| DME03187   | M | 43 | 27.6 | 91.5  | 110 | 77  | 6.31  | 5.13 | 2.64  | 2.71 | 1.18 | 407.2 | 106 | ChongQing | MUO |
| DME03195   | M | 18 | 32.1 | 109   | 118 | 69  | 4.46  | 3.87 | 12.57 | 1.26 | 0.63 | 544.6 | 152 | ChongQing | MUO |
| DME03212   | M | 37 | 29.7 | 104.1 | 128 | 88  | 6.22  | 6.68 | 3.4   | 3.36 | 1.21 | 408.2 | 120 | ChongQing | MUO |
| DME03213   | M | 46 | 26   | 93.2  | 123 | 77  | 6.8   | 4.15 | 1.37  | 2.26 | 0.99 | 416.7 | 96  | ChongQing | MUO |
| DME03214   | M | 41 | 32.5 | 95    | 136 | 94  | 5.5   | 5.51 | 1.98  | 3.16 | 1.15 | 457.9 | 103 | ChongQing | MUO |
| DME03217-w | M | 27 | 31.2 | 97    | 132 | 72  | 4.49  | 4.73 | 1.8   | 2.67 | 0.91 | 725.4 | 135 | ChongQing | MUO |
| DME03222   | M | 22 | 30.3 | 94.1  | 110 | 76  | 5.56  | 4.59 | 2.67  | 2.46 | 0.84 | 472.1 | 107 | ChongQing | MUO |
| DME03241   | M | 45 | 30   | 102.1 | 124 | 83  | 5.8   | 3.88 | 3.58  | 2    | 0.89 | 507.3 | 102 | ChongQing | MUO |

|            |   |    |      |       |     |    |      |      |       |      |      |       |     |           |     |
|------------|---|----|------|-------|-----|----|------|------|-------|------|------|-------|-----|-----------|-----|
| DME03242   | M | 42 | 28.2 | 97.2  | 113 | 73 | 5.85 | 5.15 | 4.8   | 2.71 | 0.84 | 432.5 | 94  | ChongQing | MUO |
| DME03248   | M | 32 | 27.3 | 95.2  | 135 | 90 | 5.93 | 5.63 | 2     | 3.07 | 1.36 | 465.1 | 94  | ChongQing | MUO |
| DME03259   | F | 50 | 33.4 | 96.5  | 126 | 88 | 6.76 | 6.36 | 3.89  | 3.43 | 0.99 | 404.5 | 103 | ChongQing | MUO |
| DME03260   | M | 23 | 36.7 | 113.1 | 134 | 75 | 4.97 | 6.44 | 2.04  | 3.59 | 1.01 | 500.2 | 95  | ChongQing | MUO |
| DME03264   | M | 36 | 31.3 | 107.2 | 130 | 82 | 7.47 | 5.6  | 2.09  | 2.99 | 1.14 | 474.7 | 102 | ChongQing | MUO |
| DME03338   | M | 30 | 31.1 | 94    | 137 | 87 | 5.34 | 5.06 | 3.84  | 2.76 | 0.95 | 527.1 | 93  | ChongQing | MUO |
| DME03350   | M | 47 | 28   | 92.6  | 117 | 81 | 4.63 | 5.79 | 1.75  | 3.34 | 1.02 | 420.2 | 93  | ChongQing | MUO |
| DME03358   | M | 53 | 26.5 | 95.3  | 121 | 75 | 6.88 | 3.71 | 3.58  | 1.92 | 0.87 | 446   | 115 | ChongQing | MUO |
| DME03365   | M | 19 | 34.7 | 102.6 | 133 | 86 | 5.01 | 5.57 | 1.96  | 3.17 | 0.96 | 486.7 | 173 | ChongQing | MUO |
| DME03367   | M | 54 | 27.6 | 97.8  | 179 | 96 | 5.89 | 5.16 | 1.71  | 2.47 | 1.69 | 413.1 | 91  | ChongQing | MUO |
| DME03383   | M | 31 | 29.4 | 99.4  | 115 | 77 | 5.64 | 5.2  | 4.75  | 2.64 | 1.03 | 454.5 | 119 | ChongQing | MUO |
| DME03401   | F | 45 | 33.6 | 90    | 104 | 83 | 5.29 | 4.41 | 2.2   | 2.36 | 1    | 665.8 | 90  | ChongQing | MUO |
| DME03405   | M | 40 | 29.2 | 95    | 130 | 92 | 6.05 | 4.65 | 2.17  | 2.6  | 0.87 | 402.6 | 109 | ChongQing | MUO |
| DME03409   | M | 50 | 30.2 | 101.2 | 145 | 97 | 5.8  | 5.51 | 1.81  | 2.96 | 1.18 | 441.2 | 115 | ChongQing | MUO |
| DME03413   | M | 43 | 31.7 | 106.2 | 121 | 74 | 4.39 | 5.45 | 2.83  | 2.94 | 1.01 | 464.1 | 107 | ChongQing | MUO |
| DME03475   | M | 34 | 29   | 96    | 113 | 86 | 4.65 | 5.62 | 11.84 | 2.17 | 0.7  | 436.1 | 153 | ChongQing | MUO |
| DME03477   | M | 48 | 31.2 | 101.7 | 140 | 97 | 5.32 | 4.21 | 1.46  | 2.18 | 0.97 | 405.1 | 101 | ChongQing | MUO |
| DME03481   | M | 29 | 35.5 | 113.5 | 123 | 79 | 6.28 | 6.12 | 5.59  | 2.95 | 1.21 | 535.5 | 117 | ChongQing | MUO |
| DME03487   | M | 29 | 34.3 | 112   | 150 | 94 | 5.69 | 5.74 | 1.87  | 0.97 | 3.95 | 509.2 | 133 | ChongQing | MUO |
| DME03493   | M | 47 | 30.2 | 99.5  | 114 | 77 | 5.34 | 4.38 | 3.46  | 2.18 | 0.8  | 528.4 | 126 | ChongQing | MUO |
| DME03497   | F | 53 | 28.7 | 87.5  | 111 | 71 | 5.74 | 5.02 | 1.9   | 2.66 | 0.94 | 453.7 | 119 | ChongQing | MUO |
| DME03520   | M | 42 | 28   | 102   | 122 | 88 | 5.17 | 5.83 | 15.8  | 1.86 | 0.69 | 477.1 | 207 | ChongQing | MUO |
| DME03539-W | M | 34 | 29.6 | 96    | 117 | 62 | 4.9  | 4.49 | 4.91  | 2.23 | 0.91 | 518.9 | 99  | ChongQing | MUO |
| DME03901   | M | 31 | 31.9 | 103   | 132 | 88 | 5.3  | 5.05 | 1.94  | 2.61 | 1.07 | 453.1 | 101 | ChongQing | MUO |
| DME03916   | M | 31 | 28.8 | 98.4  | 139 | 87 | 5.91 | 4.73 | 1.85  | 2.42 | 0.9  | 430.2 | 108 | ChongQing | MUO |

|            |   |    |      |       |     |     |      |      |       |      |      |       |     |           |     |
|------------|---|----|------|-------|-----|-----|------|------|-------|------|------|-------|-----|-----------|-----|
| DME03947   | M | 44 | 27   | 91.8  | 139 | 86  | 5.54 | 4.79 | 2.11  | 2.36 | 1.38 | 435.7 | 99  | ChongQing | MUO |
| DME03950   | M | 58 | 34.1 | 117   | 116 | 72  | 6.6  | 3.86 | 2.02  | 1.97 | 0.9  | 443.7 | 108 | ChongQing | MUO |
| DME03979   | M | 44 | 27.8 | 95.2  | 132 | 90  | 5.14 | 5.86 | 1.78  | 2.96 | 1.67 | 417.6 | 107 | ChongQing | MUO |
| DME03984   | M | 45 | 29.9 | 100   | 116 | 79  | 5.08 | 4.94 | 2.75  | 2.81 | 0.84 | 411.8 | 90  | ChongQing | MUO |
| DME03988   | M | 29 | 35.4 | 113.4 | 153 | 90  | 4.92 | 6.3  | 3.51  | 3.48 | 1.14 | 412.9 | 116 | ChongQing | MUO |
| DME03989   | M | 46 | 33.5 | 112.9 | 163 | 100 | 6.18 | 5.26 | 1.88  | 2.88 | 1.14 | 482.8 | 108 | ChongQing | MUO |
| DME04000   | M | 37 | 30.1 | 95    | 126 | 86  | 5.5  | 5.87 | 15.32 | 1.92 | 0.62 | 492.4 | 123 | ChongQing | MUO |
| DME04014   | M | 41 | 32.7 | 96    | 131 | 80  | 5.36 | 4.4  | 2.3   | 2.39 | 0.91 | 404.9 | 117 | ChongQing | MUO |
| DME04716   | M | 31 | 30.1 | 95.3  | 137 | 88  | 5.22 | 5.15 | 2.26  | 2.58 | 1.22 | 688.7 | 92  | ChongQing | MUO |
| DME04727   | M | 53 | 30.4 | 104.5 | 131 | 83  | 6.29 | 3.75 | 2.36  | 1.93 | 0.85 | 454.8 | 103 | ChongQing | MUO |
| DME04749   | F | 39 | 32.9 | 99.6  | 120 | 89  | 6.18 | 6.81 | 3.2   | 3.7  | 1.17 | 440.7 | 108 | ChongQing | MUO |
| DME04750   | M | 34 | 32.4 | 106   | 145 | 95  | 6.94 | 6.18 | 2.08  | 3.34 | 1.19 | 475.6 | 130 | ChongQing | MUO |
| DME04755   | M | 36 | 29.6 | 97.2  | 133 | 89  | 6.22 | 5.73 | 2.53  | 2.9  | 1.19 | 425.6 | 110 | ChongQing | MUO |
| DME04765   | M | 40 | 28.5 | 97    | 127 | 81  | 6.24 | 5.2  | 1.74  | 2.44 | 1.35 | 413.2 | 86  | ChongQing | MUO |
| DME04771   | M | 25 | 35.3 | 116.9 | 122 | 75  | 5.06 | 3.89 | 2.01  | 1.97 | 0.91 | 455.4 | 110 | ChongQing | MUO |
| DME04788   | M | 42 | 26   | 93    | 126 | 70  | 5.33 | 6.71 | 14.49 | 2.2  | 0.67 | 416.7 | 144 | ChongQing | MUO |
| DME04812-w | M | 45 | 28.2 | 103.2 | 132 | 83  | 7.97 | 4.83 | 2.01  | 2.72 | 1.04 | 443.1 | 118 | ChongQing | MUO |
| DME04844   | M | 24 | 26.9 | 93.6  | 142 | 96  | 5.13 | 4.74 | 3.28  | 1.87 | 1.04 | 412.2 | 109 | ChongQing | MUO |
| DME04897   | M | 18 | 32.8 | 104   | 130 | 88  | 4.91 | 4.05 | 1.4   | 2.07 | 0.99 | 584.1 | 154 | ChongQing | MUO |
| DME04902   | M | 62 | 27.5 | 96.5  | 147 | 90  | 7.15 | 5.01 | 1.38  | 2.47 | 1.23 | 407   | 99  | ChongQing | MUO |
| DME04906   | M | 53 | 28.7 | 89.2  | 132 | 89  | 6.12 | 4.97 | 1.72  | 2.49 | 1.15 | 451.3 | 111 | ChongQing | MUO |
| DME04928   | M | 25 | 35.3 | 111.2 | 133 | 74  | 6.32 | 5.24 | 1.95  | 2.86 | 1.12 | 468   | 109 | ChongQing | MUO |
| DME04933   | F | 53 | 27.2 | 89    | 165 | 104 | 6.04 | 5.12 | 2.14  | 2    | 1.24 | 514.7 | 118 | ChongQing | MUO |
| DME05009   | F | 48 | 30.3 | 92.6  | 139 | 77  | 5.52 | 5.26 | 1.77  | 2.64 | 1.01 | 426.7 | 103 | ChongQing | MUO |
| DME05026   | M | 37 | 26.1 | 94.3  | 133 | 77  | 6.41 | 4.61 | 2     | 2.38 | 1.12 | 429.3 | 136 | ChongQing | MUO |

|              |   |    |      |       |     |     |      |      |       |      |      |       |     |           |     |
|--------------|---|----|------|-------|-----|-----|------|------|-------|------|------|-------|-----|-----------|-----|
| DME05032     | M | 53 | 25.7 | 90.8  | 135 | 96  | 5.13 | 6.16 | 4.43  | 3.04 | 1.07 | 407   | 119 | ChongQing | MUO |
| DME05318     | M | 46 | 26.3 | 87.3  | 133 | 89  | 5.2  | 5.45 | 1.96  | 2.83 | 1.01 | 420.1 | 134 | ChongQing | MUO |
| DME05320     | M | 57 | 27.1 | 90    | 135 | 97  | 6.11 | 5.16 | 3.11  | 2.62 | 0.99 | 410.2 | 106 | ChongQing | MUO |
| DME05324     | F | 50 | 33.8 | 103.4 | 178 | 117 | 6.16 | 5.49 | 1.07  | 2.85 | 1.16 | 419.7 | 131 | ChongQing | MUO |
| DME05326     | M | 33 | 35.5 | 106.2 | 137 | 89  | 5.48 | 3.43 | 3.36  | 1.65 | 0.77 | 466.9 | 116 | ChongQing | MUO |
| DME05331     | M | 45 | 29.4 | 90.5  | 136 | 91  | 5.68 | 5.2  | 2.11  | 2.6  | 1.25 | 452.3 | 112 | ChongQing | MUO |
| DME05336     | M | 44 | 30.4 | 109.2 | 110 | 62  | 6.54 | 4.43 | 1.37  | 2.37 | 1.03 | 414.5 | 101 | ChongQing | MUO |
| DME05342-c-w | M | 41 | 26.6 | 91.3  | 126 | 79  | 5.55 | 4.44 | 1.95  | 2.35 | 0.94 | 503.2 | 108 | ChongQing | MUO |
| DME05344     | M | 46 | 26.2 | 94.2  | 111 | 64  | 4.41 | 5.06 | 18.16 | 1.34 | 0.45 | 489.4 | 116 | ChongQing | MUO |
| DME05465-w   | M | 39 | 33.6 | 100.7 | 123 | 82  | 6.02 | 4.75 | 3.76  | 2.3  | 0.95 | 617.1 | 124 | ChongQing | MUO |
| DME05471     | F | 38 | 30.6 | 86.4  | 119 | 76  | 5.46 | 5.73 | 4.96  | 2.81 | 0.91 | 419.9 | 117 | ChongQing | MUO |
| DME05485     | M | 48 | 26   | 90    | 108 | 78  | 6.21 | 5    | 2.37  | 2.73 | 1.02 | 434   | 127 | ChongQing | MUO |
| DME05488     | M | 46 | 27.6 | 94    | 116 | 82  | 6.2  | 5.29 | 1.95  | 2.75 | 1.33 | 453.8 | 104 | ChongQing | MUO |
| DME05489     | M | 40 | 29.7 | 101.3 | 142 | 102 | 5.61 | 4.29 | 7.16  | 1.86 | 0.77 | 617.8 | 115 | ChongQing | MUO |
| DME05496     | M | 49 | 27.2 | 93    | 121 | 77  | 6.1  | 5.08 | 3.88  | 2.32 | 0.98 | 481.6 | 111 | ChongQing | MUO |
| DME05499     | M | 33 | 40.6 | 123.3 | 128 | 83  | 6.5  | 5.11 | 4.04  | 2.57 | 0.93 | 515.5 | 154 | ChongQing | MUO |
| DME05513     | M | 31 | 34.5 | 117   | 120 | 82  | 5.38 | 5.24 | 5.66  | 2.56 | 0.99 | 472.4 | 125 | ChongQing | MUO |
| DME05537     | M | 53 | 32.5 | 104   | 137 | 86  | 5.87 | 3.81 | 0.97  | 2.03 | 0.9  | 404.3 | 133 | ChongQing | MUO |
| DME05547     | F | 32 | 29.8 | 87.2  | 106 | 58  | 6.2  | 5.35 | 1.76  | 3.21 | 0.99 | 450.8 | 132 | ChongQing | MUO |
| DME05556     | M | 58 | 29.7 | 91    | 137 | 85  | 6.15 | 5.35 | 1.99  | 2.74 | 1.1  | 454.2 | 92  | ChongQing | MUO |
| DME05558     | M | 26 | 29.7 | 99    | 114 | 77  | 5.25 | 5.47 | 2.65  | 2.77 | 1.04 | 488   | 117 | ChongQing | MUO |
| DME05576     | M | 43 | 28.3 | 96.2  | 131 | 92  | 5.57 | 5.62 | 1.82  | 2.84 | 1.22 | 475.1 | 112 | ChongQing | MUO |
| DME05581     | M | 31 | 27.2 | 93    | 116 | 72  | 4.8  | 8.55 | 18.39 | 1.92 | 0.58 | 460.5 | 114 | ChongQing | MUO |
| DME05591     | M | 37 | 53.7 | 152.5 | 230 | 135 | 5.42 | 4.21 | 1.77  | 2.06 | 1.47 | 487.8 | 160 | ChongQing | MUO |
| DME05601     | M | 42 | 30   | 100.2 | 136 | 87  | 5.21 | 5.67 | 1.95  | 2.73 | 1.41 | 427.3 | 106 | ChongQing | MUO |

|            |   |    |      |       |     |     |      |      |       |      |      |       |     |           |     |
|------------|---|----|------|-------|-----|-----|------|------|-------|------|------|-------|-----|-----------|-----|
| DME05606   | M | 50 | 27.9 | 99    | 140 | 89  | 5.05 | 5.38 | 1.89  | 2.95 | 1.06 | 408.9 | 114 | ChongQing | MUO |
| DME05611   | M | 42 | 30.3 | 94.2  | 130 | 88  | 5.44 | 6.42 | 2.57  | 3.35 | 1.19 | 502.9 | 93  | ChongQing | MUO |
| DME05720   | M | 63 | 29.8 | 98.2  | 136 | 78  | 4.78 | 3.43 | 1.78  | 1.55 | 0.93 | 411   | 87  | ChongQing | MUO |
| DME05722   | M | 50 | 30   | 96.3  | 139 | 88  | 8.8  | 4.73 | 1.35  | 2.37 | 1.18 | 444.3 | 123 | ChongQing | MUO |
| DME05793   | M | 45 | 29.6 | 100.1 | 128 | 89  | 5.35 | 4.15 | 2.82  | 1.98 | 0.95 | 544.2 | 83  | ChongQing | MUO |
| DME05801   | M | 48 | 31.3 | 103.2 | 137 | 78  | 5.94 | 4.56 | 1.76  | 2.36 | 0.87 | 446.2 | 92  | ChongQing | MUO |
| DME05808-w | M | 46 | 30.4 | 100   | 136 | 87  | 5.85 | 4.76 | 2.42  | 2.53 | 1.01 | 440.1 | 93  | ChongQing | MUO |
| DME05814   | M | 28 | 30.3 | 101.2 | 130 | 89  | 5.22 | 5.26 | 4.6   | 2.59 | 0.96 | 400.5 | 113 | ChongQing | MUO |
| DME05816   | M | 47 | 28.3 | 97    | 108 | 79  | 5.93 | 4.4  | 3.6   | 2.31 | 0.78 | 436.5 | 122 | ChongQing | MUO |
| DME05907   | M | 47 | 32.2 | 109.3 | 135 | 88  | 5.74 | 6.66 | 2.08  | 3.39 | 1.63 | 454.6 | 151 | ChongQing | MUO |
| DME05916   | M | 51 | 34.3 | 109.2 | 154 | 96  | 6.28 | 5.14 | 1.85  | 2.53 | 1.36 | 590.7 | 96  | ChongQing | MUO |
| DME05950   | M | 49 | 28.6 | 96    | 130 | 88  | 6.29 | 5.59 | 1.44  | 2.69 | 1.45 | 527.7 | 136 | ChongQing | MUO |
| DME05962   | M | 44 | 32.3 | 103   | 144 | 86  | 6.14 | 5.83 | 0.91  | 2.97 | 1.34 | 408   | 115 | ChongQing | MUO |
| DME05975   | M | 44 | 25.9 | 92    | 129 | 82  | 5.45 | 4.65 | 4.49  | 2.33 | 0.83 | 450   | 93  | ChongQing | MUO |
| DME06015   | M | 43 | 32.3 | 101.3 | 139 | 98  | 6.78 | 4.63 | 1.86  | 2.43 | 1.08 | 407.6 | 79  | ChongQing | MUO |
| DME06043   | M | 42 | 28   | 106   | 119 | 79  | 5.65 | 4.7  | 2.11  | 2.38 | 0.92 | 479   | 129 | ChongQing | MUO |
| DME06187   | M | 44 | 29.4 | 94.2  | 105 | 69  | 4.61 | 6.21 | 5.48  | 2.92 | 0.98 | 407.5 | 96  | ChongQing | MUO |
| DME06192   | M | 58 | 28.6 | 95.2  | 115 | 82  | 6.17 | 6.67 | 2.69  | 3.43 | 1.22 | 427   | 113 | ChongQing | MUO |
| DME06200   | M | 44 | 31.1 | 108   | 121 | 78  | 4.55 | 3.59 | 1.7   | 1.7  | 0.95 | 434.2 | 127 | ChongQing | MUO |
| DME06213   | F | 25 | 36.6 | 109   | 138 | 100 | 6.79 | 4.84 | 1.51  | 2.42 | 1.09 | 566.9 | 148 | ChongQing | MUO |
| DME06226   | M | 36 | 26.7 | 93.7  | 125 | 84  | 6.59 | 5.78 | 4.05  | 2.84 | 1.1  | 450.9 | 100 | ChongQing | MUO |
| DME06227   | M | 33 | 33.8 | 106.2 | 141 | 96  | 6.21 | 4.61 | 1.4   | 2.35 | 1.19 | 454.1 | 119 | ChongQing | MUO |
| DME06253-w | M | 48 | 30.2 | 88.2  | 132 | 87  | 4.9  | 7.02 | 17.57 | 1.91 | 0.56 | 479.1 | 144 | ChongQing | MUO |
| DME06274-w | M | 48 | 27   | 97.6  | 142 | 90  | 5.39 | 5.68 | 1.94  | 2.94 | 1.05 | 406   | 104 | ChongQing | MUO |
| DME06289-w | F | 30 | 30.5 | 97    | 114 | 70  | 5.61 | 3.8  | 2.38  | 1.85 | 0.96 | 434.1 | 144 | ChongQing | MUO |

|             |   |    |      |      |     |     |      |      |      |      |      |       |     |           |     |
|-------------|---|----|------|------|-----|-----|------|------|------|------|------|-------|-----|-----------|-----|
| DME06305    | M | 42 | 29.1 | 97   | 165 | 115 | 5.89 | 5.91 | 2    | 2.39 | 1.11 | 438.8 | 107 | ChongQing | MUO |
| DME06340    | M | 32 | 32   | 98.3 | 117 | 71  | 4.82 | 3.84 | 2.48 | 1.92 | 1.03 | 604.5 | 105 | ChongQing | MUO |
| DME06343    | M | 52 | 30.1 | 94   | 130 | 87  | 5.53 | 6.36 | 3.14 | 3.39 | 1.29 | 459.5 | 109 | ChongQing | MUO |
| DME06385    | M | 26 | 27.9 | 92   | 106 | 73  | 5    | 4.39 | 9.03 | 1.65 | 0.73 | 461.4 | 109 | ChongQing | MUO |
| DME06446    | M | 35 | 28.4 | 93   | 120 | 80  | 5.55 | 6.06 | 2.8  | 3.29 | 0.98 | 405.5 | 113 | ChongQing | MUO |
| DME06460    | M | 41 | 27.6 | 96.5 | 135 | 100 | 5.9  | 5.67 | 2.06 | 2.92 | 1.38 | 566   | 90  | ChongQing | MUO |
| DME06679    | F | 51 | 36.2 | 110  | 147 | 73  | 6.14 | 4.74 | 2.18 | 2.33 | 1.1  | 470.7 | 136 | ChongQing | MUO |
| DME06694-w  | M | 52 | 42.8 | 129  | 130 | 86  | 5.24 | 5.07 | 1.4  | 2.61 | 0.99 | 447.2 | 130 | ChongQing | MUO |
| DME06696    | M | 27 | 31   | 98.8 | 119 | 77  | 5.35 | 4.88 | 1.8  | 2.5  | 0.95 | 556.4 | 91  | ChongQing | MUO |
| DSFP01038-w | M | 39 | 28.6 | 99.2 | 115 | 72  | 6.54 | 5.1  | 2.59 | 2.73 | 1.15 | 514.9 | 107 | ChongQing | MUO |
| DSFP01047   | F | 21 | 33.6 | 103  | 120 | 86  | 5.62 | 6.86 | 5.64 | 3.66 | 0.92 | 507.7 | 115 | ChongQing | MUO |
| DSFP01085   | M | 34 | 28.3 | 96.7 | 119 | 71  | 5.67 | 5.5  | 3.33 | 2.89 | 0.9  | 455.6 | 101 | ChongQing | MUO |
| 90043293    | M | 45 | 26.5 | 90   | 131 | 76  | 4.71 | 6.38 | 1.19 | 4.29 | 1.63 | 379.4 | 105 | QuanZhou  | MHO |
| DME03082    | M | 30 | 25.2 | 85   | 129 | 83  | 4.54 | 6.74 | 2.18 | 4.5  | 1.32 | 343.8 | 97  | QuanZhou  | MHO |
| DME03511    | M | 51 | 26.3 | 90   | 125 | 87  | 5.39 | 6.16 | 0.94 | 3.53 | 2.02 | 359.6 | 98  | QuanZhou  | MHO |
| DME04097    | M | 44 | 27.9 | 90   | 125 | 87  | 7.16 | 4.65 | 1.07 | 2.94 | 1.11 | 380.5 | 70  | QuanZhou  | MHO |
| DME04099    | F | 40 | 25.4 | 81   | 115 | 69  | 4.91 | 4.84 | 0.99 | 3.45 | 1.36 | 178.9 | 158 | QuanZhou  | MHO |
| DME04101-1  | F | 39 | 26.1 | 88   | 112 | 63  | 4.92 | 6.08 | 1.27 | 3.9  | 2.31 | 377.6 | 143 | QuanZhou  | MHO |
| DME04102    | M | 30 | 29.7 | 93   | 124 | 65  | 4.92 | 5.08 | 1.45 | 3.45 | 1.33 | 372.8 | 111 | QuanZhou  | MHO |
| DME04104-1  | F | 34 | 36.9 | 115  | 110 | 62  | 5    | 4.64 | 1.47 | 2.86 | 1.66 | 326.1 | 190 | QuanZhou  | MHO |
| DME04105    | M | 55 | 28.8 | 92   | 129 | 70  | 5.3  | 4.65 | 1.2  | 1.29 | 2.56 | 181.3 | 124 | QuanZhou  | MHO |
| DME04107    | M | 52 | 26   | 87   | 133 | 81  | 8.42 | 5.8  | 1.29 | 3.3  | 2.21 | 310.6 | 101 | QuanZhou  | MHO |
| DME04108    | M | 43 | 25.3 | 89   | 109 | 67  | 6.04 | 5.07 | 1.36 | 3.36 | 1.4  | 339.8 | 89  | QuanZhou  | MHO |
| DME04176-1  | F | 34 | 27.1 | NA   | 123 | 86  | 5.14 | 5.34 | 0.91 | 3.28 | 1.23 | 391.6 | 108 | QuanZhou  | MHO |
| DME04177    | M | 54 | 26.7 | 93   | 114 | 62  | 5.07 | 6.53 | 1.27 | 4.39 | 1.6  | 351.2 | 100 | QuanZhou  | MHO |

|            |   |    |      |      |     |    |      |      |      |      |      |       |     |          |     |
|------------|---|----|------|------|-----|----|------|------|------|------|------|-------|-----|----------|-----|
| DME04181   | M | 26 | 30.4 | 100  | 127 | 69 | 5.73 | 3.31 | 0.42 | 1.91 | 1.29 | 321.7 | 128 | QuanZhou | MHO |
| DME04182-w | M | 43 | 26   | 90   | 101 | 57 | 5.78 | 5.47 | 0.74 | 3.24 | 1.23 | 366   | 90  | QuanZhou | MHO |
| DME04184-1 | M | 52 | 28.3 | 90   | 101 | 61 | 6.94 | 5.01 | 0.68 | 2.92 | 1.37 | 354.4 | 98  | QuanZhou | MHO |
| DME04189-1 | M | 50 | 26.4 | 92   | 137 | 70 | 5.1  | 4.55 | 0.77 | 2.43 | 1.63 | 378.7 | 93  | QuanZhou | MHO |
| DME04234   | F | 48 | 25.4 | 76   | 116 | 72 | 5.49 | 6.09 | 0.86 | 5.02 | 1.65 | 289.3 | 118 | QuanZhou | MHO |
| DME04236   | F | 54 | 26.6 | 84   | 133 | 80 | 5.16 | 5.36 | 0.63 | 3.55 | 1.98 | 309.5 | 161 | QuanZhou | MHO |
| DME04238   | M | 45 | 27.6 | 92   | 138 | 82 | 5.45 | 6.33 | 1.27 | 4.79 | 1.57 | 341.6 | 117 | QuanZhou | MHO |
| DME04240   | F | 44 | 28.4 | 82   | 104 | 69 | 5.55 | 5.86 | 0.78 | 3.43 | 1.49 | 207.6 | 106 | QuanZhou | MHO |
| DME04241   | M | 60 | 26.8 | 93   | 150 | 82 | 5.77 | 4.33 | 0.69 | 2.81 | 1.22 | 396.7 | 117 | QuanZhou | MHO |
| DME04243   | M | 27 | 28.5 | 90   | 134 | 83 | 5.42 | 5.21 | 2.51 | 3.74 | 1.14 | 394.7 | 131 | QuanZhou | MHO |
| DME04417   | M | 33 | 28   | 87   | 109 | 57 | 5.85 | 4.72 | 0.68 | 2.87 | 1.67 | 396.6 | 136 | QuanZhou | MHO |
| DME04418   | F | 33 | 25   | 83   | 110 | 65 | 5.1  | 6.97 | 1.22 | 4.92 | 1.62 | 371   | 127 | QuanZhou | MHO |
| DME04422   | M | 34 | 26.1 | NA   | 124 | 81 | 5.33 | 6.26 | 1.09 | 4.78 | 1.54 | 373.2 | 137 | QuanZhou | MHO |
| DME04430   | M | 45 | 27.8 | 90   | 135 | 93 | 4.8  | 5.58 | 1.11 | 4.04 | 1.46 | 297.8 | 67  | QuanZhou | MHO |
| DME04432   | M | 61 | 25.4 | 95   | 132 | 75 | 5.66 | 7.66 | 1.52 | 6.48 | 1.5  | 373.6 | 107 | QuanZhou | MHO |
| DME04464   | M | 51 | 25.3 | 84   | 131 | 80 | 5.16 | 4.66 | 3.21 | 3.21 | 1.17 | 319.1 | 76  | QuanZhou | MHO |
| DME04471   | M | 64 | 27.8 | 91   | 108 | 68 | 5.2  | 4.31 | 0.76 | 2.43 | 1.72 | 277.3 | 133 | QuanZhou | MHO |
| DME04473   | F | 40 | 26.2 | 76   | 117 | 68 | 4.92 | 5.54 | 0.54 | 2.59 | 2.13 | 243.7 | 122 | QuanZhou | MHO |
| DME04474   | M | 32 | 27.9 | 93   | 118 | 77 | 5.62 | 5.69 | 1.08 | 4.03 | 1.39 | 377.9 | 97  | QuanZhou | MHO |
| DME04476   | F | 47 | 26.4 | 78.5 | 109 | 58 | 4.78 | 6.15 | 1.35 | 4.78 | 1.35 | 331.9 | 134 | QuanZhou | MHO |
| DME04478   | M | 36 | 26.5 | 84   | 126 | 72 | 5.34 | 5.31 | 1.16 | 3.74 | 1.46 | 292   | 91  | QuanZhou | MHO |
| DME04489   | F | 49 | 26.2 | 92   | 98  | 58 | 4.97 | 5.08 | 1.04 | 4.05 | 1.09 | 337.1 | 114 | QuanZhou | MHO |
| DME04492   | M | 36 | 26.1 | 83   | 124 | 75 | 5.35 | 6.93 | 1.46 | 5.39 | 1.41 | 326.4 | 115 | QuanZhou | MHO |
| DME04499   | F | 45 | 27.6 | 92   | 97  | 55 | 4.84 | 6.62 | 1.34 | 4.12 | 1.67 | 280.3 | 100 | QuanZhou | MHO |
| DME04501   | F | 43 | 27.2 | 89   | 117 | 74 | 5.98 | 5.08 | 1.07 | 2.73 | 1.85 | 331.1 | 128 | QuanZhou | MHO |

|              |   |    |      |     |     |     |      |      |       |      |      |       |     |          |     |
|--------------|---|----|------|-----|-----|-----|------|------|-------|------|------|-------|-----|----------|-----|
| DME04502     | F | 34 | 26.4 | NA  | 129 | 74  | 4.76 | 6.08 | 1.36  | 4.05 | 1.73 | 313.9 | 144 | QuanZhou | MHO |
| DME04504     | F | 59 | 28.2 | 92  | 135 | 77  | 6.05 | 6.16 | 0.99  | 4.01 | 1.84 | 345.9 | 89  | QuanZhou | MHO |
| DME03092     | M | 34 | 28.6 | 99  | 135 | 87  | 6.47 | 4.82 | 1.85  | 2.87 | 1.32 | 512.5 | 78  | QuanZhou | MUO |
| DME04088     | M | 43 | 25.3 | 93  | 109 | 81  | 6.53 | 7.2  | 2.82  | 5.37 | 1.16 | 480.5 | 108 | QuanZhou | MUO |
| DME04090     | M | 46 | 30.8 | 104 | 126 | 83  | 6.24 | 4.43 | 1.09  | 3.01 | 0.94 | 421.8 | 95  | QuanZhou | MUO |
| DME04098     | M | 51 | 28.4 | 103 | 152 | 85  | 6.27 | 4.84 | 0.77  | 3.2  | 1.55 | 400   | 102 | QuanZhou | MUO |
| DME04179     | M | 39 | 27.5 | 97  | 135 | 86  | 6.09 | 4.21 | 1.99  | 2.41 | 1.6  | 403.7 | 114 | QuanZhou | MUO |
| DME04180-1   | M | 34 | 27.6 | 100 | 148 | 97  | 5.44 | 5.37 | 2.11  | 3.21 | 1.38 | 487.6 | 92  | QuanZhou | MUO |
| DME04185-1-w | M | 27 | 32.3 | 107 | 111 | 63  | 5.18 | 5.9  | 3.5   | 2.94 | 1.02 | 562.5 | 93  | QuanZhou | MUO |
| DME04193     | M | 26 | 27   | 95  | 157 | 96  | 5.55 | 6.08 | 2.02  | 3.97 | 1.2  | 489.1 | 100 | QuanZhou | MUO |
| DME04233     | M | 36 | 27.5 | 91  | 130 | 87  | 5.5  | 4.66 | 3.5   | 2.27 | 1.3  | 551.3 | 94  | QuanZhou | MUO |
| DME04433     | M | 48 | 26.9 | 94  | 138 | 88  | 6.59 | 6.1  | 1.72  | 4.47 | 1.64 | 574.2 | 95  | QuanZhou | MUO |
| DME04434-w   | M | 46 | 26.9 | 90  | 140 | 99  | 6.34 | 5.37 | 5.79  | 1.21 | 1.02 | 415.6 | 121 | QuanZhou | MUO |
| DME04463     | M | 55 | 27.8 | 97  | 127 | 79  | 6.55 | 5.54 | 1.72  | 3.55 | 1.46 | 544.5 | 86  | QuanZhou | MUO |
| DME04477     | M | 24 | 31.9 | 94  | 116 | 81  | 6.46 | 7.89 | 5.6   | 3.06 | 1.27 | 752.3 | 109 | QuanZhou | MUO |
| DME04481     | M | 52 | 27.6 | 96  | 124 | 77  | 8.45 | 4.84 | 2.06  | 2.97 | 1.14 | 494.6 | 107 | QuanZhou | MUO |
| DME04485     | M | 42 | 25.2 | 91  | 113 | 81  | 6.37 | 7.88 | 10.53 | 5.12 | 1.75 | 426.8 | 91  | QuanZhou | MUO |
| DME04543-w   | M | 57 | 29.3 | 108 | 137 | 85  | 5.64 | 5.98 | 2.15  | 4.63 | 1.04 | 457.8 | 96  | QuanZhou | MUO |
| DME04645     | M | 40 | 25   | 93  | 124 | 77  | 6.03 | 4.24 | 1.94  | 2.53 | 0.93 | 442.8 | 114 | QuanZhou | MUO |
| DME05280     | M | 45 | 27.8 | 102 | 150 | 105 | 6.95 | 7.39 | 8.75  | 4.34 | 1.37 | 411   | 107 | QuanZhou | MUO |
| DME05351     | M | 23 | 39   | 123 | 128 | 81  | 5.57 | 4.69 | 3.21  | 3.36 | 0.86 | 727.8 | 103 | QuanZhou | MUO |
| DME05369     | M | 43 | 26.5 | 92  | 146 | 103 | 6.32 | 5.78 | 0.79  | 3.46 | 1.93 | 407.4 | 116 | QuanZhou | MUO |
| DME05371     | M | 50 | 28.2 | 103 | 108 | 63  | 6.38 | 7.62 | 1.76  | 6.01 | 1.7  | 537.9 | 96  | QuanZhou | MUO |
| DME05732-W   | M | 32 | 28.1 | 97  | 132 | 86  | 5.42 | 4.56 | 2.35  | 3.21 | 1.13 | 498.8 | 148 | QuanZhou | MUO |
| DME05818     | M | 31 | 30.2 | 99  | 138 | 86  | 6.97 | 6.05 | 2.69  | 3.99 | 1.29 | 528.7 | 104 | QuanZhou | MUO |



|             |   |    |      |     |     |    |      |      |      |      |      |       |     |          |     |
|-------------|---|----|------|-----|-----|----|------|------|------|------|------|-------|-----|----------|-----|
| DME05856    | M | 53 | 25   | 94  | 129 | 86 | 6.34 | 6.4  | 2.45 | 3.58 | 1.95 | 482.8 | 97  | QuanZhou | MUO |
| DME06325    | M | 50 | 28.3 | 95  | 154 | 88 | 6.27 | 5.6  | 1.23 | 4.03 | 1.84 | 432.4 | 130 | QuanZhou | MUO |
| DME06332-w  | M | 54 | 26.6 | 97  | 131 | 86 | 4.65 | 5.5  | 2.35 | 3.75 | 1.19 | 487.8 | 122 | QuanZhou | MUO |
| DME06396-w  | M | 31 | 26.4 | 94  | 139 | 87 | 4.74 | 5.71 | 2.25 | 4.25 | 1.25 | 441.7 | 121 | QuanZhou | MUO |
| DME06404    | M | 33 | 32.2 | 105 | 128 | 73 | 6.81 | 6.01 | 2.69 | 4.21 | 1.18 | 430.1 | 108 | QuanZhou | MUO |
| DME06423-w  | M | 63 | 31.8 | 103 | 152 | 92 | 7.45 | 4.84 | 0.6  | 2.91 | 1.38 | 405.6 | 103 | QuanZhou | MUO |
| DME06448    | M | 55 | 30.5 | 107 | 138 | 85 | 5.58 | 5.68 | 2.05 | 3.6  | 1.53 | 482.1 | 136 | QuanZhou | MUO |
| DSFP01031-w | M | 22 | 40.2 | 117 | 134 | 76 | 5.78 | 4.04 | 1.95 | 2.71 | 0.97 | 523.6 | 157 | QuanZhou | MUO |
| DSFP01070   | M | 46 | 27   | 92  | 132 | 85 | 6.1  | 5.69 | 1.24 | 3.98 | 1.24 | 400.7 | 117 | QuanZhou | MUO |
| DSFP01080   | M | 38 | 30.1 | 100 | 139 | 88 | 6.31 | 5.12 | 2.93 | 3.49 | 1.16 | 622.8 | 119 | QuanZhou | MUO |

**Table S2. The clinical information of Chongqing and Quanzhou cohorts**

|                                                  | Chongqing Cohort     |                      | Quanzhou Cohort      |                      |
|--------------------------------------------------|----------------------|----------------------|----------------------|----------------------|
|                                                  | MHO                  | MUO                  | MHO                  | MUO                  |
| Age (years, mean $\pm$ SD)                       | 44.924 $\pm$ 9.19    | 40.652 $\pm$ 9.752   | 43.550 $\pm$ 9.842   | 41.485 $\pm$ 10.963  |
| BMI (kg/m <sup>2</sup> , mean $\pm$ SD)          | 27.431 $\pm$ 2.135   | 30.526 $\pm$ 3.710   | 27.160 $\pm$ 2.025   | 28.894 $\pm$ 3.447   |
| WL (cm, mean $\pm$ SD)                           | 88.350 $\pm$ 7.181   | 99.838 $\pm$ 8.961   | 82.288 $\pm$ 24.628  | 99.152 $\pm$ 7.425   |
| SBP (mm Hg, mean $\pm$ SD)                       | 122.285 $\pm$ 16.158 | 129.826 $\pm$ 16.448 | 120.975 $\pm$ 12.548 | 133.333 $\pm$ 12.920 |
| DBP (mm Hg, mean $\pm$ SD)                       | 77.761 $\pm$ 10.708  | 83.449 $\pm$ 11.278  | 72.250 $\pm$ 9.650   | 84.909 $\pm$ 9.190   |
| GLU (mmol/L, mean $\pm$ SD)                      | 5.401 $\pm$ 0.506    | 5.759 $\pm$ 0.836    | 5.440 $\pm$ 0.733    | 6.162 $\pm$ 0.745    |
| TC (mmol/L, mean $\pm$ SD)                       | 5.171 $\pm$ 0.903    | 5.114 $\pm$ 0.865    | 5.557 $\pm$ 0.888    | 5.637 $\pm$ 1.047    |
| TG (mmol/L, mean $\pm$ SD)                       | 1.419 $\pm$ 0.720    | 3.466 $\pm$ 3.382    | 1.173 $\pm$ 0.519    | 2.741 $\pm$ 2.119    |
| LDL (mmol/L, mean $\pm$ SD)                      | 2.566 $\pm$ 0.554    | 2.540 $\pm$ 0.513    | 3.665 $\pm$ 0.993    | 3.566 $\pm$ 0.950    |
| HDL (mmol/L, mean $\pm$ SD)                      | 1.405 $\pm$ 0.307    | 1.046 $\pm$ 0.328    | 1.573 $\pm$ 0.338    | 1.324 $\pm$ 0.293    |
| UA ( $\mu$ mol/L, mean $\pm$ SD)                 | 315.933 $\pm$ 54.814 | 465.220 $\pm$ 62.891 | 331.055 $\pm$ 55.005 | 492.085 $\pm$ 86.250 |
| eGFR (mL/min/1.73m <sup>2</sup> , mean $\pm$ SD) | 118.924 $\pm$ 22.946 | 114.109 $\pm$ 19.714 | 114.250 $\pm$ 25.195 | 108.455 $\pm$ 17.139 |

BMI:Body mass index; WL:Waist; SBP:Systolic blood pressure; DBP:diastolic blood pressure; GLU:Glucose; TC:Total cholesterol; TG:Triglyceride; LDL:Low density lipoprotein; HDL:High density lipoprotein; UA:Uric acid; eGFR:Epidermal growth factor receptor

Table S3. The sequencing data production

| Sample     | Rawdata(Gb) | Cleandata(Gb) | Align(Gb) | Align Rates(%) | Area      | Class | gene count |
|------------|-------------|---------------|-----------|----------------|-----------|-------|------------|
| 90043605   | 4.212       | 2.809         | 1.799     | 64.05          | ChongQing | MHO   | 510598     |
| DME03088   | 5.845       | 3.598         | 2.651     | 73.68          | ChongQing | MHO   | 350028     |
| DME03101   | 4.906       | 3.763         | 2.939     | 78.1           | ChongQing | MHO   | 559206     |
| DME03104   | 5.359       | 4.664         | 3.538     | 75.84          | ChongQing | MHO   | 585663     |
| DME03106   | 6.262       | 5.178         | 3.994     | 77.12          | ChongQing | MHO   | 614551     |
| DME03111   | 6.289       | 5.041         | 3.888     | 77.12          | ChongQing | MHO   | 644172     |
| DME03116   | 6.546       | 5.710         | 4.268     | 74.75          | ChongQing | MHO   | 646270     |
| DME03140   | 5.968       | 4.175         | 3.264     | 78.18          | ChongQing | MHO   | 442738     |
| DME03150   | 6.079       | 4.430         | 3.483     | 78.61          | ChongQing | MHO   | 395686     |
| DME03176   | 6.471       | 5.385         | 3.872     | 71.89          | ChongQing | MHO   | 606736     |
| DME03192   | 5.743       | 4.521         | 3.418     | 75.6           | ChongQing | MHO   | 321864     |
| DME03204   | 5.151       | 4.298         | 3.138     | 73             | ChongQing | MHO   | 799985     |
| DME03209   | 5.589       | 4.849         | 3.164     | 65.25          | ChongQing | MHO   | 890980     |
| DME03219   | 5.99        | 5.078         | 3.847     | 75.76          | ChongQing | MHO   | 606931     |
| DME03228   | 5.918       | 4.707         | 3.032     | 64.41          | ChongQing | MHO   | 384568     |
| DME03244   | 5.153       | 4.405         | 3.220     | 73.1           | ChongQing | MHO   | 483346     |
| DME03246   | 5.423       | 4.814         | 3.568     | 74.11          | ChongQing | MHO   | 427398     |
| DME03251-1 | 5.816       | 4.687         | 3.362     | 71.73          | ChongQing | MHO   | 519297     |
| DME03257   | 4.874       | 3.842         | 2.926     | 76.15          | ChongQing | MHO   | 383446     |
| DME03335   | 5.743       | 4.715         | 3.560     | 75.49          | ChongQing | MHO   | 779014     |
| DME03336   | 6.208       | 4.622         | 3.613     | 78.17          | ChongQing | MHO   | 405479     |
| DME03337   | 4.65        | 3.507         | 2.550     | 72.71          | ChongQing | MHO   | 571036     |
| DME03339   | 5.532       | 4.551         | 3.602     | 79.16          | ChongQing | MHO   | 501205     |
| DME03341   | 5.563       | 4.521         | 3.416     | 75.56          | ChongQing | MHO   | 551524     |
| DME03355   | 5.504       | 4.235         | 3.157     | 74.54          | ChongQing | MHO   | 370340     |
| DME03356   | 5.429       | 4.163         | 3.053     | 73.32          | ChongQing | MHO   | 798058     |
| DME03361   | 5.42        | 4.087         | 3.178     | 77.76          | ChongQing | MHO   | 460024     |
| DME03362   | 4.81        | 3.617         | 2.736     | 75.64          | ChongQing | MHO   | 317223     |
| DME03374   | 5.029       | 4.347         | 3.381     | 77.77          | ChongQing | MHO   | 510308     |
| DME03381   | 5.388       | 4.102         | 3.095     | 75.44          | ChongQing | MHO   | 681849     |
| DME03385   | 5.833       | 4.553         | 3.436     | 75.47          | ChongQing | MHO   | 886909     |
| DME03386   | 5.686       | 4.394         | 3.413     | 77.68          | ChongQing | MHO   | 573075     |
| DME03393   | 5.733       | 4.314         | 3.204     | 74.27          | ChongQing | MHO   | 523216     |
| DME03396   | 5.956       | 4.742         | 3.638     | 76.72          | ChongQing | MHO   | 559578     |
| DME03414   | 5.532       | 4.199         | 3.174     | 75.59          | ChongQing | MHO   | 697640     |
| DME03471   | 4.808       | 3.118         | 2.285     | 73.28          | ChongQing | MHO   | 589143     |
| DME03480   | 6.345       | 5.087         | 3.821     | 75.11          | ChongQing | MHO   | 588430     |
| DME03483   | 5.319       | 4.511         | 3.291     | 72.95          | ChongQing | MHO   | 699995     |
| DME03485   | 6.211       | 5.101         | 3.844     | 75.36          | ChongQing | MHO   | 693165     |
| DME03491   | 5.291       | 4.203         | 3.170     | 75.43          | ChongQing | MHO   | 553961     |
| DME03495   | 5.592       | 4.433         | 3.344     | 75.45          | ChongQing | MHO   | 401115     |
| DME03499-1 | 7.423       | 5.836         | 4.322     | 74.06          | ChongQing | MHO   | 546556     |
| DME03514   | 5.407       | 4.346         | 3.273     | 75.3           | ChongQing | MHO   | 506226     |
| DME03515   | 6.348       | 5.240         | 3.857     | 73.61          | ChongQing | MHO   | 744013     |
| DME03519   | 6.337       | 5.460         | 3.912     | 71.64          | ChongQing | MHO   | 734714     |
| DME03534   | 5.474       | 4.535         | 3.453     | 76.14          | ChongQing | MHO   | 528853     |
| DME03538   | 5.22        | 4.302         | 3.089     | 71.81          | ChongQing | MHO   | 482124     |
| DME03892   | 6.349       | 6.029         | 4.499     | 74.62          | ChongQing | MHO   | 752640     |
| DME03894   | 4.501       | 3.612         | 2.701     | 74.78          | ChongQing | MHO   | 423508     |
| DME03903   | 4.646       | 3.828         | 2.766     | 72.25          | ChongQing | MHO   | 603501     |

Table S3. The sequencing data production

| Sample     | Rawdata(Gb) | Cleandata(Gb) | Align(Gb) | Align Rates(%) | Area      | Class | gene count |
|------------|-------------|---------------|-----------|----------------|-----------|-------|------------|
| DME03908   | 5.081       | 4.444         | 3.285     | 73.91          | ChongQing | MHO   | 615107     |
| DME03910   | 5.198       | 4.413         | 3.286     | 74.48          | ChongQing | MHO   | 642125     |
| DME03923   | 4.484       | 3.283         | 1.816     | 55.32          | ChongQing | MHO   | 604536     |
| DME03925   | 5.801       | 5.019         | 3.510     | 69.93          | ChongQing | MHO   | 773156     |
| DME03943   | 4.427       | 3.546         | 2.638     | 74.39          | ChongQing | MHO   | 381239     |
| DME03944   | 4.82        | 4.089         | 3.037     | 74.26          | ChongQing | MHO   | 516124     |
| DME03953   | 4.989       | 4.366         | 2.628     | 60.18          | ChongQing | MHO   | 195266     |
| DME03959   | 5.115       | 4.301         | 3.294     | 76.57          | ChongQing | MHO   | 617369     |
| DME03961   | 5.478       | 4.527         | 3.350     | 73.99          | ChongQing | MHO   | 728302     |
| DME03969   | 5.581       | 4.730         | 3.603     | 76.16          | ChongQing | MHO   | 399292     |
| DME04006   | 6.264       | 4.858         | 3.695     | 76.06          | ChongQing | MHO   | 684981     |
| DME04011   | 6.594       | 5.808         | 4.298     | 74.01          | ChongQing | MHO   | 660007     |
| DME04024   | 5.351       | 4.654         | 3.568     | 76.66          | ChongQing | MHO   | 314273     |
| DME04705-w | 5.162       | 4.767         | 3.263     | 68.46          | ChongQing | MHO   | 323809     |
| DME04706   | 5.252       | 4.553         | 3.187     | 70.01          | ChongQing | MHO   | 522133     |
| DME04711   | 6.129       | 5.500         | 3.961     | 72.02          | ChongQing | MHO   | 435300     |
| DME04712   | 5.897       | 5.142         | 3.589     | 69.8           | ChongQing | MHO   | 616916     |
| DME04715   | 5.408       | 4.775         | 3.416     | 71.55          | ChongQing | MHO   | 427563     |
| DME04717   | 6.275       | 5.523         | 4.015     | 72.69          | ChongQing | MHO   | 366523     |
| DME04722   | 5.595       | 4.647         | 3.290     | 70.8           | ChongQing | MHO   | 600165     |
| DME04752   | 6.149       | 4.329         | 2.820     | 65.14          | ChongQing | MHO   | 744536     |
| DME04753   | 5.161       | 4.224         | 2.805     | 66.4           | ChongQing | MHO   | 587550     |
| DME04756   | 5.508       | 4.378         | 2.990     | 68.29          | ChongQing | MHO   | 268895     |
| DME04757   | 5.924       | 5.202         | 3.666     | 70.48          | ChongQing | MHO   | 837270     |
| DME04764   | 5.112       | 4.332         | 3.064     | 70.75          | ChongQing | MHO   | 742864     |
| DME04767   | 6.333       | 5.539         | 3.701     | 66.81          | ChongQing | MHO   | 766326     |
| DME04772   | 5.154       | 4.411         | 3.162     | 71.68          | ChongQing | MHO   | 531608     |
| DME04777   | 5.78        | 5.082         | 3.569     | 70.22          | ChongQing | MHO   | 633406     |
| DME04792   | 5.82        | 5.059         | 3.594     | 71.05          | ChongQing | MHO   | 328204     |
| DME04794   | 5.33        | 4.691         | 3.352     | 71.45          | ChongQing | MHO   | 384997     |
| DME04802   | 5.445       | 4.598         | 3.373     | 73.37          | ChongQing | MHO   | 363046     |
| DME04807   | 5.719       | 5.152         | 3.632     | 70.5           | ChongQing | MHO   | 828612     |
| DME04809   | 5.554       | 4.894         | 3.359     | 68.65          | ChongQing | MHO   | 958193     |
| DME04813   | 6.384       | 5.555         | 3.957     | 71.23          | ChongQing | MHO   | 661933     |
| DME04816   | 5.873       | 5.018         | 3.587     | 71.48          | ChongQing | MHO   | 520857     |
| DME04843   | 5.879       | 5.360         | 3.743     | 69.83          | ChongQing | MHO   | 565115     |
| DME04845   | 6.068       | 5.574         | 3.888     | 69.76          | ChongQing | MHO   | 502673     |
| DME04847   | 5.797       | 4.939         | 3.339     | 67.59          | ChongQing | MHO   | 546281     |
| DME04849   | 5.472       | 4.827         | 3.340     | 69.18          | ChongQing | MHO   | 921474     |
| DME04863   | 5.563       | 4.859         | 3.380     | 69.56          | ChongQing | MHO   | 775081     |
| DME04866   | 5.152       | 4.887         | 3.452     | 70.62          | ChongQing | MHO   | 728652     |
| DME04874   | 6.216       | 5.672         | 3.466     | 61.11          | ChongQing | MHO   | 452754     |
| DME04875   | 6.134       | 5.165         | 3.394     | 65.72          | ChongQing | MHO   | 931528     |
| DME04878   | 5.41        | 4.683         | 3.202     | 68.37          | ChongQing | MHO   | 647577     |
| DME04880   | 6.49        | 5.364         | 3.649     | 68.02          | ChongQing | MHO   | 537632     |
| DME04884   | 6.66        | 6.113         | 4.237     | 69.31          | ChongQing | MHO   | 516067     |
| DME04890   | 6.208       | 5.394         | 3.770     | 69.88          | ChongQing | MHO   | 545154     |
| DME04900   | 6.476       | 5.842         | 4.024     | 68.89          | ChongQing | MHO   | 845411     |
| DME04908   | 6.176       | 5.510         | 3.776     | 68.54          | ChongQing | MHO   | 774694     |
| DME04910   | 5.132       | 4.525         | 3.194     | 70.59          | ChongQing | MHO   | 517834     |

Table S3. The sequencing data production

| Sample     | Rawdata(Gb) | Cleandata(Gb) | Align(Gb) | Align Rates(%) | Area      | Class | gene count |
|------------|-------------|---------------|-----------|----------------|-----------|-------|------------|
| DME04911   | 6.574       | 5.907         | 4.097     | 69.36          | ChongQing | MHO   | 710175     |
| DME04929   | 6.15        | 5.245         | 3.677     | 70.09          | ChongQing | MHO   | 692365     |
| DME05000-W | 5.98        | 3.423         | 2.158     | 63.04          | ChongQing | MHO   | 572836     |
| DME05003   | 6.949       | 5.653         | 3.842     | 67.96          | ChongQing | MHO   | 538619     |
| DME05007   | 7.207       | 5.718         | 4.006     | 70.06          | ChongQing | MHO   | 459191     |
| DME05011   | 5.476       | 3.498         | 2.192     | 62.66          | ChongQing | MHO   | 539744     |
| DME05024   | 6.953       | 4.312         | 2.979     | 69.08          | ChongQing | MHO   | 627805     |
| DME05082   | 5.602       | 4.974         | 3.485     | 70.06          | ChongQing | MHO   | 572977     |
| DME05099   | 4.785       | 3.748         | 2.663     | 71.04          | ChongQing | MHO   | 340918     |
| DME05101   | 5.195       | 4.644         | 3.258     | 70.15          | ChongQing | MHO   | 517221     |
| DME05111   | 5.862       | 5.182         | 3.592     | 69.31          | ChongQing | MHO   | 697266     |
| DME05113   | 6.117       | 5.386         | 3.790     | 70.37          | ChongQing | MHO   | 397118     |
| DME05114   | 5.075       | 4.223         | 2.938     | 69.57          | ChongQing | MHO   | 466809     |
| DME05267   | 5.501       | 3.795         | 2.148     | 56.59          | ChongQing | MHO   | 320681     |
| DME05321   | 6.368       | 5.154         | 3.300     | 64.02          | ChongQing | MHO   | 1052542    |
| DME05322   | 4.366       | 3.278         | 2.257     | 68.85          | ChongQing | MHO   | 270558     |
| DME05323   | 5.458       | 4.415         | 3.048     | 69.04          | ChongQing | MHO   | 442219     |
| DME05330   | 5.298       | 4.145         | 2.715     | 65.5           | ChongQing | MHO   | 589634     |
| DME05333   | 5.386       | 4.159         | 2.818     | 67.76          | ChongQing | MHO   | 498075     |
| DME05340   | 4.81        | 3.984         | 2.778     | 69.73          | ChongQing | MHO   | 366964     |
| DME05475   | 5.546       | 4.856         | 3.335     | 68.68          | ChongQing | MHO   | 317678     |
| DME05493   | 5.149       | 4.505         | 3.002     | 66.64          | ChongQing | MHO   | 558566     |
| DME05506   | 5.978       | 4.867         | 3.392     | 69.69          | ChongQing | MHO   | 494968     |
| DME05510   | 4.255       | 3.395         | 2.375     | 69.95          | ChongQing | MHO   | 627034     |
| DME05517   | 4.436       | 3.564         | 2.513     | 70.52          | ChongQing | MHO   | 553080     |
| DME05522   | 4.536       | 3.464         | 2.510     | 72.46          | ChongQing | MHO   | 350776     |
| DME05540   | 6.389       | 5.529         | 3.767     | 68.13          | ChongQing | MHO   | 588828     |
| DME05571   | 5.773       | 4.641         | 3.345     | 72.08          | ChongQing | MHO   | 382898     |
| DME05580   | 5.505       | 4.795         | 3.266     | 68.12          | ChongQing | MHO   | 709385     |
| DME05582   | 5.563       | 4.435         | 3.208     | 72.33          | ChongQing | MHO   | 416972     |
| DME05597   | 5.969       | 4.392         | 3.161     | 71.98          | ChongQing | MHO   | 330317     |
| DME05715   | 5.097       | 3.830         | 2.410     | 62.92          | ChongQing | MHO   | 690499     |
| DME05794   | 7.193       | 6.281         | 4.205     | 66.95          | ChongQing | MHO   | 404530     |
| DME05915   | 5.864       | 4.601         | 3.209     | 69.76          | ChongQing | MHO   | 634820     |
| DME05932   | 5.544       | 4.600         | 3.151     | 68.49          | ChongQing | MHO   | 714872     |
| DME05936   | 5.37        | 4.434         | 3.228     | 72.8           | ChongQing | MHO   | 318246     |
| DME05948   | 4.96        | 3.987         | 2.691     | 67.49          | ChongQing | MHO   | 916212     |
| DME05949   | 5.949       | 5.092         | 3.605     | 70.81          | ChongQing | MHO   | 434730     |
| DME05951   | 5.686       | 5.002         | 3.301     | 66             | ChongQing | MHO   | 529595     |
| DME05960   | 5.486       | 3.467         | 2.460     | 70.97          | ChongQing | MHO   | 246779     |
| DME06157   | 5.97        | 5.159         | 3.242     | 62.83          | ChongQing | MHO   | 844793     |
| DME06160   | 5.804       | 5.252         | 3.845     | 73.2           | ChongQing | MHO   | 299830     |
| DME06202   | 5.187       | 4.155         | 2.808     | 67.57          | ChongQing | MHO   | 806211     |
| DME06210   | 6.088       | 5.033         | 3.528     | 70.1           | ChongQing | MHO   | 562291     |
| DME06211   | 5.101       | 4.480         | 3.166     | 70.68          | ChongQing | MHO   | 441504     |
| DME06217   | 5.366       | 4.826         | 3.424     | 70.95          | ChongQing | MHO   | 715961     |
| DME06218   | 6.305       | 5.612         | 4.009     | 71.43          | ChongQing | MHO   | 1035325    |
| DME06220   | 6.286       | 5.733         | 3.975     | 69.33          | ChongQing | MHO   | 579124     |
| DME06223   | 5.392       | 4.468         | 2.984     | 66.79          | ChongQing | MHO   | 414731     |
| DME06230   | 6.287       | 5.381         | 3.978     | 73.93          | ChongQing | MHO   | 502599     |

Table S3. The sequencing data production

| Sample     | Rawdata(Gb) | Cleandata(Gb) | Align(Gb) | Align Rates(%) | Area      | Class | gene count |
|------------|-------------|---------------|-----------|----------------|-----------|-------|------------|
| DME06231   | 5.757       | 4.635         | 3.222     | 69.53          | ChongQing | MHO   | 693517     |
| DME06232   | 4.225       | 3.632         | 2.601     | 71.61          | ChongQing | MHO   | 359158     |
| DME06233   | 5.438       | 4.849         | 3.327     | 68.61          | ChongQing | MHO   | 588220     |
| DME06234   | 5.449       | 3.301         | 2.364     | 71.6           | ChongQing | MHO   | 371387     |
| DME06243   | 6.452       | 5.678         | 4.020     | 70.81          | ChongQing | MHO   | 747539     |
| DME06252   | 6.281       | 5.652         | 4.137     | 73.18          | ChongQing | MHO   | 513038     |
| DME06268   | 5.933       | 4.370         | 3.099     | 70.92          | ChongQing | MHO   | 398601     |
| DME06288   | 5.784       | 4.789         | 3.368     | 70.32          | ChongQing | MHO   | 523796     |
| DME06298   | 6.258       | 5.614         | 3.980     | 70.9           | ChongQing | MHO   | 615658     |
| DME06338   | 5.143       | 2.776         | 1.794     | 64.62          | ChongQing | MHO   | 423468     |
| DME06344   | 5.89        | 3.812         | 2.287     | 59.99          | ChongQing | MHO   | 740205     |
| DME06345   | 6.133       | 4.755         | 2.667     | 56.09          | ChongQing | MHO   | 138186     |
| DME06384-w | 4.393       | 1.548         | 0.782     | 50.54          | ChongQing | MHO   | 155086     |
| DME06449   | 4.32        | 3.270         | 1.781     | 54.45          | ChongQing | MHO   | 323861     |
| DME06463   | 4.885       | 3.855         | 2.658     | 68.93          | ChongQing | MHO   | 278523     |
| DME06533   | 5.261       | 4.893         | 3.317     | 67.78          | ChongQing | MHO   | 568868     |
| DME06539   | 5.409       | 4.842         | 3.368     | 69.55          | ChongQing | MHO   | 478587     |
| DME06676   | 6.345       | 6.193         | 4.431     | 71.54          | ChongQing | MHO   | 434386     |
| DME06681   | 5.913       | 5.346         | 3.654     | 68.34          | ChongQing | MHO   | 804138     |
| DSFP00812  | 5.253       | 4.570         | 3.162     | 69.19          | ChongQing | MHO   | 468669     |
| DSFP00934  | 5.283       | 3.882         | 1.966     | 50.65          | ChongQing | MHO   | 456750     |
| DSFP00988  | 6.334       | 5.605         | 1.837     | 32.78          | ChongQing | MHO   | 315414     |
| 90042801   | 7.975       | 6.757         | 4.492     | 66.48          | ChongQing | MUO   | 348889     |
| 90043608   | 3.447       | 2.377         | 1.551     | 65.26          | ChongQing | MUO   | 531525     |
| DME03089   | 7.146       | 5.001         | 3.869     | 77.36          | ChongQing | MUO   | 489185     |
| DME03100   | 6.044       | 4.636         | 3.608     | 77.84          | ChongQing | MUO   | 489574     |
| DME03107-w | 5.232       | 3.863         | 2.555     | 66.13          | ChongQing | MUO   | 564283     |
| DME03110   | 5.56        | 4.392         | 3.416     | 77.77          | ChongQing | MUO   | 352535     |
| DME03119   | 5.907       | 4.474         | 3.407     | 76.15          | ChongQing | MUO   | 630385     |
| DME03127   | 5.794       | 4.528         | 3.133     | 69.18          | ChongQing | MUO   | 664999     |
| DME03134   | 5.818       | 4.725         | 3.532     | 74.75          | ChongQing | MUO   | 393499     |
| DME03146   | 6.028       | 5.114         | 4.018     | 78.58          | ChongQing | MUO   | 559322     |
| DME03153   | 6.573       | 5.498         | 4.288     | 77.98          | ChongQing | MUO   | 661631     |
| DME03157   | 5.748       | 4.369         | 3.485     | 79.76          | ChongQing | MUO   | 332101     |
| DME03158   | 5.683       | 4.618         | 3.522     | 76.26          | ChongQing | MUO   | 672590     |
| DME03163   | 5.848       | 4.911         | 3.779     | 76.95          | ChongQing | MUO   | 572907     |
| DME03164   | 5.326       | 3.880         | 2.873     | 74.05          | ChongQing | MUO   | 542845     |
| DME03166   | 6.144       | 5.360         | 3.844     | 71.72          | ChongQing | MUO   | 413300     |
| DME03175   | 5.788       | 3.851         | 2.802     | 72.76          | ChongQing | MUO   | 503419     |
| DME03186   | 5.283       | 4.239         | 3.141     | 74.09          | ChongQing | MUO   | 433456     |
| DME03187   | 5.836       | 4.723         | 3.337     | 70.65          | ChongQing | MUO   | 392828     |
| DME03195   | 5.217       | 3.908         | 2.998     | 76.71          | ChongQing | MUO   | 339628     |
| DME03212   | 5.171       | 4.046         | 2.863     | 70.77          | ChongQing | MUO   | 415223     |
| DME03213   | 5.45        | 4.215         | 3.074     | 72.94          | ChongQing | MUO   | 332838     |
| DME03214   | 6.316       | 5.056         | 3.761     | 74.38          | ChongQing | MUO   | 319244     |
| DME03217-w | 5.117       | 3.904         | 2.730     | 69.92          | ChongQing | MUO   | 588191     |
| DME03222   | 5.603       | 4.306         | 3.205     | 74.42          | ChongQing | MUO   | 450064     |
| DME03241   | 4.906       | 4.228         | 3.008     | 71.14          | ChongQing | MUO   | 282919     |
| DME03242   | 4.39        | 3.238         | 2.398     | 74.05          | ChongQing | MUO   | 389298     |
| DME03248   | 5.076       | 3.836         | 2.716     | 70.81          | ChongQing | MUO   | 393759     |

Table S3. The sequencing data production

| Sample     | Rawdata(Gb) | Cleandata(Gb) | Align(Gb) | Align Rates(%) | Area      | Class | gene count |
|------------|-------------|---------------|-----------|----------------|-----------|-------|------------|
| DME03259   | 6.206       | 4.717         | 3.449     | 73.12          | ChongQing | MUO   | 463364     |
| DME03260   | 7.375       | 5.868         | 4.417     | 75.27          | ChongQing | MUO   | 415830     |
| DME03264   | 6.549       | 4.717         | 3.669     | 77.77          | ChongQing | MUO   | 359648     |
| DME03338   | 5.262       | 4.569         | 3.350     | 73.32          | ChongQing | MUO   | 361979     |
| DME03350   | 6.768       | 4.981         | 3.525     | 70.77          | ChongQing | MUO   | 705715     |
| DME03358   | 6.066       | 4.562         | 3.465     | 75.95          | ChongQing | MUO   | 458414     |
| DME03365   | 5.256       | 4.494         | 3.352     | 74.58          | ChongQing | MUO   | 356143     |
| DME03367   | 5.285       | 3.814         | 2.932     | 76.86          | ChongQing | MUO   | 389623     |
| DME03383   | 5.554       | 4.308         | 2.894     | 67.17          | ChongQing | MUO   | 521636     |
| DME03401   | 5.996       | 4.585         | 3.468     | 75.64          | ChongQing | MUO   | 364304     |
| DME03405   | 5.192       | 3.864         | 3.004     | 77.75          | ChongQing | MUO   | 285946     |
| DME03409   | 5.542       | 4.189         | 3.148     | 75.15          | ChongQing | MUO   | 722986     |
| DME03413   | 4.8         | 3.668         | 2.735     | 74.57          | ChongQing | MUO   | 378125     |
| DME03475   | 4.903       | 3.675         | 2.813     | 76.54          | ChongQing | MUO   | 272759     |
| DME03477   | 5.859       | 4.543         | 3.387     | 74.55          | ChongQing | MUO   | 395576     |
| DME03481   | 5.503       | 4.357         | 3.152     | 72.34          | ChongQing | MUO   | 321825     |
| DME03487   | 5.269       | 4.134         | 3.143     | 76.03          | ChongQing | MUO   | 406406     |
| DME03493   | 5.882       | 4.561         | 3.391     | 74.35          | ChongQing | MUO   | 482993     |
| DME03497   | 5.583       | 4.500         | 3.412     | 75.83          | ChongQing | MUO   | 606859     |
| DME03520   | 5.458       | 4.283         | 3.169     | 74             | ChongQing | MUO   | 333332     |
| DME03539-W | 4.38        | 2.847         | 1.663     | 58.41          | ChongQing | MUO   | 282424     |
| DME03901   | 5.186       | 4.334         | 2.448     | 56.47          | ChongQing | MUO   | 547740     |
| DME03916   | 5.073       | 4.377         | 3.172     | 72.47          | ChongQing | MUO   | 437696     |
| DME03947   | 5.429       | 4.665         | 3.470     | 74.39          | ChongQing | MUO   | 683023     |
| DME03950   | 4.609       | 3.805         | 2.832     | 74.42          | ChongQing | MUO   | 644731     |
| DME03979   | 5.548       | 4.861         | 3.677     | 75.63          | ChongQing | MUO   | 292926     |
| DME03984   | 5.035       | 4.267         | 3.190     | 74.77          | ChongQing | MUO   | 417097     |
| DME03988   | 6.128       | 5.223         | 3.898     | 74.63          | ChongQing | MUO   | 456370     |
| DME03989   | 5.176       | 4.245         | 3.212     | 75.65          | ChongQing | MUO   | 516694     |
| DME04000   | 5.22        | 4.110         | 3.120     | 75.9           | ChongQing | MUO   | 268107     |
| DME04014   | 5.602       | 4.779         | 3.632     | 75.99          | ChongQing | MUO   | 481148     |
| DME04716   | 6.242       | 5.141         | 3.620     | 70.4           | ChongQing | MUO   | 550924     |
| DME04727   | 6.248       | 4.252         | 3.129     | 73.6           | ChongQing | MUO   | 285494     |
| DME04749   | 5.209       | 4.564         | 3.129     | 68.57          | ChongQing | MUO   | 790529     |
| DME04750   | 5.88        | 5.275         | 3.731     | 70.72          | ChongQing | MUO   | 375542     |
| DME04755   | 5.802       | 5.175         | 3.597     | 69.51          | ChongQing | MUO   | 750570     |
| DME04765   | 6.011       | 5.191         | 3.701     | 71.3           | ChongQing | MUO   | 507770     |
| DME04771   | 5.071       | 4.360         | 3.089     | 70.85          | ChongQing | MUO   | 476300     |
| DME04788   | 5.189       | 4.151         | 2.963     | 71.38          | ChongQing | MUO   | 449746     |
| DME04812-w | 5.973       | 4.878         | 3.477     | 71.27          | ChongQing | MUO   | 497815     |
| DME04844   | 6.777       | 5.739         | 4.076     | 71.02          | ChongQing | MUO   | 553802     |
| DME04897   | 5.277       | 4.659         | 3.279     | 70.37          | ChongQing | MUO   | 511366     |
| DME04902   | 6.193       | 5.462         | 3.815     | 69.84          | ChongQing | MUO   | 725759     |
| DME04906   | 5.618       | 5.004         | 3.484     | 69.62          | ChongQing | MUO   | 564517     |
| DME04928   | 6.149       | 4.762         | 3.062     | 64.29          | ChongQing | MUO   | 489232     |
| DME04933   | 5.744       | 5.105         | 3.671     | 71.9           | ChongQing | MUO   | 456151     |
| DME05009   | 5.285       | 3.586         | 2.326     | 64.86          | ChongQing | MUO   | 494900     |
| DME05026   | 7.057       | 5.349         | 3.675     | 68.69          | ChongQing | MUO   | 401102     |
| DME05032   | 5.227       | 3.731         | 2.456     | 65.84          | ChongQing | MUO   | 412582     |
| DME05318   | 5.444       | 4.507         | 3.055     | 67.79          | ChongQing | MUO   | 651307     |

Table S3. The sequencing data production

| Sample       | Rawdata(Gb) | Cleandata(Gb) | Align(Gb) | Align Rates(%) | Area      | Class | gene count |
|--------------|-------------|---------------|-----------|----------------|-----------|-------|------------|
| DME05320     | 5.976       | 4.836         | 3.408     | 70.47          | ChongQing | MUO   | 462480     |
| DME05324     | 5.378       | 4.244         | 2.748     | 64.74          | ChongQing | MUO   | 299066     |
| DME05326     | 4.859       | 3.856         | 2.341     | 60.71          | ChongQing | MUO   | 440569     |
| DME05331     | 5.339       | 4.472         | 3.118     | 69.73          | ChongQing | MUO   | 371143     |
| DME05336     | 4.617       | 3.480         | 2.322     | 66.74          | ChongQing | MUO   | 485526     |
| DME05342-c-w | 5.484       | 3.877         | 2.814     | 72.6           | ChongQing | MUO   | 483179     |
| DME05344     | 5.584       | 4.072         | 2.681     | 65.84          | ChongQing | MUO   | 324217     |
| DME05465-w   | 7.194       | 5.492         | 3.701     | 67.39          | ChongQing | MUO   | 735674     |
| DME05471     | 6.368       | 4.740         | 3.303     | 69.68          | ChongQing | MUO   | 779138     |
| DME05485     | 6.216       | 4.772         | 3.384     | 70.92          | ChongQing | MUO   | 357861     |
| DME05488     | 5.432       | 4.629         | 3.162     | 68.3           | ChongQing | MUO   | 209797     |
| DME05489     | 5.067       | 4.510         | 3.113     | 69.02          | ChongQing | MUO   | 580659     |
| DME05496     | 5.875       | 4.955         | 3.451     | 69.64          | ChongQing | MUO   | 517910     |
| DME05499     | 5.445       | 4.771         | 3.328     | 69.76          | ChongQing | MUO   | 412302     |
| DME05513     | 4.235       | 3.311         | 2.230     | 67.35          | ChongQing | MUO   | 374554     |
| DME05537     | 6.424       | 5.027         | 3.480     | 69.24          | ChongQing | MUO   | 878380     |
| DME05547     | 6.377       | 5.175         | 3.663     | 70.78          | ChongQing | MUO   | 593586     |
| DME05556     | 5.862       | 5.098         | 3.545     | 69.54          | ChongQing | MUO   | 746384     |
| DME05558     | 5.316       | 4.347         | 2.941     | 67.65          | ChongQing | MUO   | 467284     |
| DME05576     | 5.643       | 4.535         | 3.251     | 71.69          | ChongQing | MUO   | 406476     |
| DME05581     | 5.723       | 5.024         | 3.677     | 73.19          | ChongQing | MUO   | 315830     |
| DME05591     | 6.417       | 5.894         | 4.163     | 70.63          | ChongQing | MUO   | 460065     |
| DME05601     | 6.059       | 5.051         | 3.566     | 70.6           | ChongQing | MUO   | 737333     |
| DME05606     | 7.959       | 6.354         | 4.574     | 71.98          | ChongQing | MUO   | 466820     |
| DME05611     | 5.975       | 4.968         | 3.598     | 72.42          | ChongQing | MUO   | 389062     |
| DME05720     | 5.829       | 5.267         | 3.713     | 70.49          | ChongQing | MUO   | 772454     |
| DME05722     | 5.492       | 4.485         | 3.083     | 68.74          | ChongQing | MUO   | 743294     |
| DME05793     | 6.652       | 5.727         | 3.488     | 60.9           | ChongQing | MUO   | 383592     |
| DME05801     | 7.42        | 6.280         | 4.420     | 70.39          | ChongQing | MUO   | 572888     |
| DME05808-w   | 7.476       | 6.902         | 4.521     | 65.5           | ChongQing | MUO   | 768938     |
| DME05814     | 5.659       | 4.727         | 3.390     | 71.7           | ChongQing | MUO   | 553274     |
| DME05816     | 5.507       | 5.043         | 3.464     | 68.69          | ChongQing | MUO   | 399563     |
| DME05907     | 5.737       | 5.254         | 3.703     | 70.48          | ChongQing | MUO   | 358542     |
| DME05916     | 5.089       | 4.087         | 2.815     | 68.87          | ChongQing | MUO   | 366676     |
| DME05950     | 5.01        | 4.428         | 3.031     | 68.46          | ChongQing | MUO   | 430830     |
| DME05962     | 5.463       | 4.745         | 3.130     | 65.96          | ChongQing | MUO   | 560282     |
| DME05975     | 4.798       | 3.934         | 2.849     | 72.41          | ChongQing | MUO   | 461572     |
| DME06015     | 5.323       | 4.480         | 3.083     | 68.82          | ChongQing | MUO   | 543076     |
| DME06043     | 6.118       | 5.079         | 3.718     | 73.2           | ChongQing | MUO   | 290586     |
| DME06187     | 5.152       | 4.144         | 2.723     | 65.72          | ChongQing | MUO   | 357533     |
| DME06192     | 5.576       | 4.984         | 3.528     | 70.8           | ChongQing | MUO   | 529212     |
| DME06200     | 5.914       | 5.348         | 3.828     | 71.59          | ChongQing | MUO   | 733952     |
| DME06213     | 6.247       | 5.105         | 3.547     | 69.49          | ChongQing | MUO   | 455133     |
| DME06226     | 5.851       | 5.372         | 3.877     | 72.16          | ChongQing | MUO   | 425278     |
| DME06227     | 6.214       | 5.087         | 3.558     | 69.94          | ChongQing | MUO   | 404887     |
| DME06253-w   | 5.616       | 3.142         | 1.703     | 54.21          | ChongQing | MUO   | 453771     |
| DME06274-w   | 6.268       | 4.253         | 2.167     | 50.95          | ChongQing | MUO   | 332394     |
| DME06289-w   | 5.774       | 4.512         | 3.170     | 70.25          | ChongQing | MUO   | 223303     |
| DME06305     | 6.308       | 5.250         | 3.680     | 70.1           | ChongQing | MUO   | 669288     |
| DME06340     | 5.758       | 5.408         | 3.995     | 73.88          | ChongQing | MUO   | 228154     |



Table S3. The sequencing data production

| Sample      | Rawdata(Gb) | Cleandata(Gb) | Align(Gb) | Align Rates(%) | Area      | Class | gene count |
|-------------|-------------|---------------|-----------|----------------|-----------|-------|------------|
| DME06343    | 5.652       | 3.449         | 1.998     | 57.95          | ChongQing | MUO   | 509768     |
| DME06385    | 4.67        | 3.675         | 2.345     | 63.83          | ChongQing | MUO   | 277379     |
| DME06446    | 5.183       | 3.057         | 1.748     | 57.17          | ChongQing | MUO   | 370196     |
| DME06460    | 6.394       | 5.349         | 3.704     | 69.24          | ChongQing | MUO   | 708442     |
| DME06679    | 5.698       | 5.281         | 3.598     | 68.13          | ChongQing | MUO   | 484878     |
| DME06694-w  | 4.87        | 4.568         | 2.752     | 60.24          | ChongQing | MUO   | 350725     |
| DME06696    | 5.136       | 4.749         | 3.216     | 67.72          | ChongQing | MUO   | 543406     |
| DSFP01038-w | 5.143       | 4.154         | 2.584     | 62.21          | ChongQing | MUO   | 361781     |
| DSFP01047   | 5.575       | 4.682         | 3.390     | 72.4           | ChongQing | MUO   | 299917     |
| DSFP01085   | 4.977       | 4.331         | 2.738     | 63.22          | ChongQing | MUO   | 597032     |
| 90043293    | 4.977       | 3.324         | 1.825     | 54.91          | QuanZhou  | MHO   | 546071     |
| DME03082    | 5.296       | 3.879         | 2.977     | 76.75          | QuanZhou  | MHO   | 333222     |
| DME03511    | 4.304       | 3.080         | 2.283     | 74.13          | QuanZhou  | MHO   | 383355     |
| DME04097    | 5.406       | 4.460         | 3.284     | 73.63          | QuanZhou  | MHO   | 536193     |
| DME04099    | 5.65        | 4.858         | 3.494     | 71.93          | QuanZhou  | MHO   | 962117     |
| DME04101-1  | 4.434       | 3.313         | 2.301     | 69.46          | QuanZhou  | MHO   | 585195     |
| DME04102    | 6.053       | 5.108         | 3.636     | 71.17          | QuanZhou  | MHO   | 614196     |
| DME04104-1  | 6.691       | 5.203         | 3.305     | 63.52          | QuanZhou  | MHO   | 390411     |
| DME04105    | 6.38        | 4.910         | 3.536     | 72.01          | QuanZhou  | MHO   | 479652     |
| DME04107    | 5.996       | 5.138         | 3.525     | 68.62          | QuanZhou  | MHO   | 564496     |
| DME04108    | 5.63        | 4.962         | 3.664     | 73.83          | QuanZhou  | MHO   | 698882     |
| DME04176-1  | 5.328       | 4.369         | 3.256     | 74.54          | QuanZhou  | MHO   | 503923     |
| DME04177    | 5.502       | 3.834         | 2.608     | 68.03          | QuanZhou  | MHO   | 654217     |
| DME04181    | 5.629       | 4.498         | 3.413     | 75.88          | QuanZhou  | MHO   | 408052     |
| DME04182-w  | 7.206       | 4.210         | 2.156     | 51.22          | QuanZhou  | MHO   | 158587     |
| DME04184-1  | 5.724       | 4.444         | 3.393     | 76.34          | QuanZhou  | MHO   | 554129     |
| DME04189-1  | 5.405       | 3.902         | 2.878     | 73.75          | QuanZhou  | MHO   | 418367     |
| DME04234    | 5.115       | 4.253         | 3.088     | 72.6           | QuanZhou  | MHO   | 421564     |
| DME04236    | 5.936       | 3.841         | 2.613     | 68.04          | QuanZhou  | MHO   | 903190     |
| DME04238    | 5.187       | 4.213         | 3.094     | 73.44          | QuanZhou  | MHO   | 482740     |
| DME04240    | 4.727       | 3.835         | 2.868     | 74.79          | QuanZhou  | MHO   | 611645     |
| DME04241    | 5.214       | 4.380         | 3.034     | 69.27          | QuanZhou  | MHO   | 815016     |
| DME04243    | 5.036       | 4.015         | 2.917     | 72.66          | QuanZhou  | MHO   | 574053     |
| DME04417    | 6.136       | 4.871         | 3.366     | 69.11          | QuanZhou  | MHO   | 247331     |
| DME04418    | 5.45        | 2.982         | 1.855     | 62.22          | QuanZhou  | MHO   | 289222     |
| DME04422    | 5.641       | 4.306         | 3.185     | 73.96          | QuanZhou  | MHO   | 473740     |
| DME04430    | 5.571       | 2.880         | 1.665     | 57.81          | QuanZhou  | MHO   | 338133     |
| DME04432    | 5.916       | 4.390         | 2.697     | 61.44          | QuanZhou  | MHO   | 366156     |
| DME04464    | 6.086       | 4.924         | 3.757     | 76.3           | QuanZhou  | MHO   | 637975     |
| DME04471    | 5.671       | 4.684         | 3.479     | 74.29          | QuanZhou  | MHO   | 465251     |
| DME04473    | 4.935       | 4.015         | 3.063     | 76.29          | QuanZhou  | MHO   | 632594     |
| DME04474    | 6.559       | 5.545         | 4.130     | 74.48          | QuanZhou  | MHO   | 338569     |
| DME04476    | 6.17        | 4.966         | 3.749     | 75.49          | QuanZhou  | MHO   | 765236     |
| DME04478    | 5.636       | 4.564         | 3.385     | 74.17          | QuanZhou  | MHO   | 383281     |
| DME04489    | 5.4         | 4.378         | 3.407     | 77.84          | QuanZhou  | MHO   | 502760     |
| DME04492    | 5.445       | 4.385         | 3.349     | 76.38          | QuanZhou  | MHO   | 538989     |
| DME04499    | 5.701       | 4.632         | 3.548     | 76.59          | QuanZhou  | MHO   | 538949     |
| DME04501    | 6.352       | 5.038         | 3.671     | 72.87          | QuanZhou  | MHO   | 369104     |
| DME04502    | 6.665       | 5.304         | 3.843     | 72.44          | QuanZhou  | MHO   | 749105     |
| DME04504    | 6.109       | 5.084         | 3.714     | 73.06          | QuanZhou  | MHO   | 567027     |

Table S3. The sequencing data production

| Sample       | Rawdata(Gb) | Cleandata(Gb) | Align(Gb) | Align Rates(%) | Area     | Class | gene count |
|--------------|-------------|---------------|-----------|----------------|----------|-------|------------|
| DME03092     | 6.136       | 4.653         | 3.551     | 76.3           | QuanZhou | MUO   | 326851     |
| DME04088     | 5.72        | 4.484         | 2.845     | 63.43          | QuanZhou | MUO   | 633392     |
| DME04090     | 5.512       | 4.397         | 3.095     | 70.39          | QuanZhou | MUO   | 377506     |
| DME04098     | 6.157       | 5.102         | 3.742     | 73.34          | QuanZhou | MUO   | 598705     |
| DME04179     | 5.765       | 4.523         | 3.472     | 76.75          | QuanZhou | MUO   | 380792     |
| DME04180-1   | 6.301       | 5.007         | 3.664     | 73.16          | QuanZhou | MUO   | 418336     |
| DME04185-1-w | 5.174       | 4.216         | 3.016     | 71.54          | QuanZhou | MUO   | 588316     |
| DME04193     | 5.851       | 4.439         | 3.232     | 72.81          | QuanZhou | MUO   | 647518     |
| DME04233     | 5.034       | 3.615         | 2.777     | 76.82          | QuanZhou | MUO   | 258016     |
| DME04433     | 5.748       | 4.312         | 2.870     | 66.56          | QuanZhou | MUO   | 412502     |
| DME04434-w   | 6.057       | 2.662         | 1.759     | 66.07          | QuanZhou | MUO   | 318072     |
| DME04463     | 4.962       | 3.640         | 2.551     | 70.06          | QuanZhou | MUO   | 683120     |
| DME04477     | 5.153       | 4.213         | 2.837     | 67.32          | QuanZhou | MUO   | 409806     |
| DME04481     | 6.287       | 4.993         | 3.801     | 76.13          | QuanZhou | MUO   | 648336     |
| DME04485     | 6.373       | 4.552         | 3.502     | 76.95          | QuanZhou | MUO   | 499035     |
| DME04543-w   | 4.411       | 3.393         | 2.777     | 81.83          | QuanZhou | MUO   | 770416     |
| DME04645     | 7.136       | 5.862         | 4.509     | 76.93          | QuanZhou | MUO   | 461928     |
| DME05280     | 4.972       | 3.579         | 2.327     | 65.03          | QuanZhou | MUO   | 361494     |
| DME05351     | 5.587       | 4.578         | 3.136     | 68.51          | QuanZhou | MUO   | 351106     |
| DME05369     | 5.698       | 4.386         | 2.838     | 64.72          | QuanZhou | MUO   | 565184     |
| DME05371     | 5.813       | 3.865         | 2.225     | 57.57          | QuanZhou | MUO   | 612240     |
| DME05732-W   | 4.377       | 2.400         | 1.408     | 58.66          | QuanZhou | MUO   | 253002     |
| DME05818     | 5.337       | 4.987         | 2.919     | 58.54          | QuanZhou | MUO   | 378917     |
| DME05856     | 5.197       | 4.300         | 3.069     | 71.37          | QuanZhou | MUO   | 517243     |
| DME06325     | 5.696       | 4.034         | 2.488     | 61.66          | QuanZhou | MUO   | 352918     |
| DME06332-w   | 5.413       | 4.125         | 2.908     | 70.5           | QuanZhou | MUO   | 666205     |
| DME06396-w   | 6.108       | 0.905         | 0.307     | 33.94          | QuanZhou | MUO   | 71948      |
| DME06404     | 4.656       | 2.356         | 1.111     | 47.16          | QuanZhou | MUO   | 356406     |
| DME06423-w   | 5.834       | 3.374         | 0.990     | 29.36          | QuanZhou | MUO   | 274882     |
| DME06448     | 6.162       | 2.729         | 1.073     | 39.34          | QuanZhou | MUO   | 180082     |
| DSFP01031-w  | 4.958       | 3.265         | 1.770     | 54.21          | QuanZhou | MUO   | 282527     |
| DSFP01070    | 4.618       | 3.022         | 1.451     | 48             | QuanZhou | MUO   | 273060     |
| DSFP01080    | 6.194       | 4.911         | 3.260     | 66.38          | QuanZhou | MUO   | 212653     |

Table S4. The taxonomic analysis of two cohorts (phylum level)

| Sample ID  | Actinobacteria | Bacteroidetes | Firmicutes | Fusobacteria | Proteobacteria | Verrucomicrobia |
|------------|----------------|---------------|------------|--------------|----------------|-----------------|
| 90043605   | 1.56534        | 74.89341      | 19.09651   | 0.02559      | 3.15969        | 1.11891         |
| DME03088   | 0.25937        | 63.11787      | 20.81978   | 1.04934      | 14.75364       | 0               |
| DME03101   | 1.89576        | 61.96549      | 28.26812   | 0.10301      | 7.34554        | 0.42208         |
| DME03104   | 0.75559        | 66.77116      | 28.12615   | 0.64846      | 3.65922        | 0               |
| DME03106   | 0.2157         | 56.54021      | 38.40688   | 0            | 4.76325        | 0.06461         |
| DME03111   | 2.69491        | 57.57201      | 26.54985   | 0            | 11.91103       | 1.27219         |
| DME03116   | 1.10157        | 44.0927       | 52.62337   | 0            | 2.18036        | 0               |
| DME03140   | 2.04548        | 57.32571      | 35.34082   | 1.31297      | 3.8709         | 0.10413         |
| DME03150   | 1.76073        | 82.80043      | 14.34398   | 0            | 1.09486        | 0               |
| DME03176   | 0.55188        | 69.2811       | 14.19873   | 0            | 15.9683        | 0               |
| DME03192   | 2.78652        | 58.7396       | 9.09818    | 0            | 29.3757        | 0               |
| DME03204   | 1.71167        | 32.40107      | 44.96501   | 0            | 2.07976        | 18.72763        |
| DME03209   | 29.04773       | 9.42231       | 57.34551   | 0            | 2.15191        | 0               |
| DME03219   | 2.61394        | 56.34526      | 19.70356   | 0            | 21.33723       | 0               |
| DME03228   | 2.10379        | 45.40401      | 13.2773    | 0.04048      | 39.07633       | 0.06011         |
| DME03244   | 0.33281        | 82.70483      | 14.66767   | 0            | 2.29469        | 0               |
| DME03246   | 3.83154        | 64.50753      | 27.78303   | 0            | 3.8779         | 0               |
| DME03251-1 | 1.14409        | 44.59675      | 53.68017   | 0            | 0.57899        | 0               |
| DME03257   | 2.32871        | 75.3068       | 18.86033   | 0.06222      | 3.44193        | 0               |
| DME03335   | 3.02142        | 50.79961      | 44.00078   | 0            | 1.36565        | 0.78493         |
| DME03336   | 2.90063        | 67.55159      | 20.4813    | 0.02647      | 8.91266        | 0               |
| DME03337   | 7.59257        | 54.0611       | 35.65029   | 0            | 2.38374        | 0               |
| DME03339   | 13.03098       | 64.56953      | 21.50202   | 0            | 0.89747        | 0               |
| DME03341   | 1.0925         | 52.24864      | 44.92208   | 0            | 1.73677        | 0               |
| DME03355   | 5.75562        | 22.43493      | 44.48944   | 0            | 27.30737       | 0               |
| DME03356   | 0.17903        | 66.92973      | 30.26403   | 0            | 2.45407        | 0.17315         |
| DME03361   | 2.93333        | 86.03592      | 10.76353   | 0            | 0.26721        | 0               |
| DME03362   | 10.38237       | 31.0764       | 52.3413    | 0            | 6.19993        | 0               |
| DME03374   | 0.13375        | 76.79842      | 20.70785   | 0            | 2.27633        | 0.08364         |
| DME03381   | 0.86438        | 36.7662       | 61.46293   | 0            | 0.89669        | 0               |
| DME03385   | 2.24228        | 56.33034      | 36.17324   | 0            | 5.25414        | 0               |
| DME03386   | 1.33773        | 73.81011      | 23.28387   | 0            | 1.51638        | 0.0519          |
| DME03393   | 3.13107        | 33.6978       | 56.18973   | 4.92728      | 2.04533        | 0.00879         |
| DME03396   | 0.96027        | 66.69034      | 29.8178    | 0            | 2.53159        | 0               |
| DME03414   | 3.1357         | 33.78144      | 61.29027   | 0            | 1.35354        | 0               |
| DME03471   | 1.93941        | 40.79638      | 51.69757   | 0            | 5.50233        | 0               |
| DME03480   | 0.40102        | 63.57374      | 30.62218   | 0            | 5.40306        | 0               |
| DME03483   | 2.86212        | 43.33164      | 48.75352   | 0.26019      | 4.79253        | 0               |
| DME03485   | 1.19425        | 53.59418      | 41.0922    | 1.04785      | 3.06769        | 0               |
| DME03491   | 2.91539        | 28.80745      | 47.69714   | 0            | 20.57074       | 0               |
| DME03495   | 1.85613        | 57.32175      | 35.99163   | 0.22937      | 4.60111        | 0               |
| DME03499-1 | 2.56459        | 52.16177      | 44.68708   | 0            | 0.57728        | 0               |
| DME03514   | 0.89795        | 78.83152      | 19.0203    | 0.42329      | 0.78598        | 0.04097         |
| DME03515   | 1.62819        | 56.58368      | 36.54911   | 0            | 5.23197        | 0               |

|            |          |          |          |          |          |         |
|------------|----------|----------|----------|----------|----------|---------|
| DME03519   | 9.13278  | 26.35204 | 59.42403 | 0        | 5.08507  | 0       |
| DME03534   | 4.85461  | 40.68587 | 50.80401 | 0        | 2.95788  | 0       |
| DME03538   | 0.5995   | 41.36866 | 46.8211  | 0        | 11.21074 | 0       |
| DME03892   | 16.75265 | 44.83956 | 37.29623 | 0        | 1.05426  | 0.05515 |
| DME03894   | 0.81095  | 67.27133 | 30.70982 | 0.07713  | 1.13076  | 0       |
| DME03903   | 2.45972  | 13.38536 | 82.26582 | 0        | 1.88911  | 0       |
| DME03908   | 0.98968  | 74.68411 | 23.26453 | 0        | 0.95998  | 0.10171 |
| DME03910   | 0.93962  | 38.22529 | 59.61095 | 0        | 1.21806  | 0.00608 |
| DME03923   | 0.5405   | 52.92305 | 45.05125 | 0        | 1.4852   | 0       |
| DME03925   | 3.22651  | 46.79384 | 48.30162 | 0        | 1.67726  | 0       |
| DME03943   | 4.06401  | 39.00636 | 55.141   | 0.01219  | 1.76195  | 0       |
| DME03944   | 3.51444  | 74.99849 | 20.79282 | 0        | 0.69425  | 0       |
| DME03953   | 3.82289  | 14.93959 | 49.60084 | 0        | 31.56042 | 0       |
| DME03959   | 1.42071  | 51.41887 | 40.74806 | 0        | 5.20066  | 1.14284 |
| DME03961   | 3.82004  | 68.86904 | 26.52641 | 0        | 0.73825  | 0.03415 |
| DME03969   | 6.01717  | 58.95671 | 33.86255 | 0        | 1.16357  | 0       |
| DME04006   | 0.78543  | 43.17749 | 54.76091 | 0        | 1.27617  | 0       |
| DME04011   | 9.53524  | 45.5477  | 35.06298 | 0        | 9.85408  | 0       |
| DME04024   | 2.60124  | 56.93101 | 37.17363 | 0        | 3.29412  | 0       |
| DME04705-w | 0.86166  | 91.1321  | 6.89304  | 0        | 0.64976  | 0       |
| DME04706   | 0.92875  | 75.0436  | 21.73516 | 0        | 2.29249  | 0       |
| DME04711   | 0.01783  | 31.59117 | 59.8173  | 0.00135  | 8.57235  | 0       |
| DME04712   | 0.12929  | 67.79222 | 28.07331 | 0.07299  | 0.77398  | 0       |
| DME04715   | 0.37826  | 84.23419 | 8.8152   | 0        | 6.57235  | 0       |
| DME04717   | 1.27324  | 59.0708  | 37.34956 | 0.00138  | 2.30501  | 0       |
| DME04722   | 1.05887  | 31.8083  | 52.03101 | 13.33106 | 1.77075  | 0       |
| DME04752   | 0.24713  | 53.70313 | 44.91187 | 0        | 0.81617  | 0.3217  |
| DME04753   | 0.82711  | 54.44571 | 43.55445 | 0        | 1.16404  | 0       |
| DME04756   | 0.10372  | 43.53053 | 56.21362 | 0        | 0.15213  | 0       |
| DME04757   | 0.42795  | 62.22027 | 35.9222  | 0        | 1.42093  | 0       |
| DME04764   | 0.04048  | 68.91564 | 30.53738 | 0.00344  | 0.24553  | 0       |
| DME04767   | 0.03812  | 65.37143 | 33.93626 | 0.26256  | 0.39163  | 0       |
| DME04772   | 0.52786  | 61.27553 | 35.91982 | 0.32986  | 1.94693  | 0       |
| DME04777   | 0.82314  | 41.70707 | 55.87622 | 0.0325   | 1.56106  | 0       |
| DME04792   | 9.54782  | 69.44996 | 18.99464 | 0        | 2.00757  | 0       |
| DME04794   | 1.71632  | 40.23837 | 56.46028 | 0.03695  | 1.54809  | 0       |
| DME04802   | 0.7841   | 72.88018 | 21.39719 | 0        | 4.93852  | 0       |
| DME04807   | 0.34775  | 51.10769 | 46.66754 | 0.01182  | 0.82122  | 0.39538 |
| DME04809   | 0.43073  | 42.93354 | 52.69475 | 0.02069  | 3.8864   | 0       |
| DME04813   | 0.77836  | 61.73647 | 34.89716 | 0.00298  | 1.02162  | 1.54685 |
| DME04816   | 0.27323  | 68.87615 | 19.86353 | 8.66027  | 2.32682  | 0       |
| DME04843   | 0.11468  | 61.94918 | 37.43535 | 0        | 0.50079  | 0       |
| DME04845   | 0.41556  | 84.6789  | 14.81892 | 0        | 0.0841   | 0       |
| DME04847   | 0.33708  | 34.82646 | 62.08441 | 0        | 2.73222  | 0       |
| DME04849   | 1.28682  | 52.79685 | 43.08868 | 0        | 2.28285  | 0.54481 |
| DME04863   | 0.63682  | 65.78748 | 32.94695 | 0.01033  | 0.61843  | 0       |

|            |         |          |          |          |          |         |
|------------|---------|----------|----------|----------|----------|---------|
| DME04866   | 1.2844  | 55.55341 | 42.08505 | 0        | 1.07714  | 0       |
| DME04874   | 0.09654 | 77.59616 | 19.8646  | 0        | 2.4427   | 0       |
| DME04875   | 0.21319 | 51.89883 | 44.65268 | 0        | 0.85105  | 0       |
| DME04878   | 0.43219 | 72.68703 | 26.31291 | 0        | 0.49274  | 0.07514 |
| DME04880   | 1.15332 | 51.6964  | 44.74069 | 0        | 2.40959  | 0       |
| DME04884   | 0.06779 | 71.21972 | 28.65011 | 0        | 0.05159  | 0.00839 |
| DME04890   | 2.39171 | 21.53876 | 26.29257 | 0.23183  | 49.53892 | 0       |
| DME04900   | 1.13973 | 43.14922 | 54.2185  | 0        | 1.48629  | 0       |
| DME04908   | 7.61678 | 23.62056 | 65.67389 | 0        | 3.08328  | 0.0055  |
| DME04910   | 1.77551 | 50.28591 | 46.21964 | 0.42531  | 1.27042  | 0.02322 |
| DME04911   | 0.75469 | 39.32684 | 55.39007 | 0.00324  | 3.78513  | 0.74003 |
| DME04929   | 0.7605  | 38.14467 | 58.64703 | 0.00487  | 2.42815  | 0       |
| DME05000-W | 4.10958 | 46.47808 | 45.89459 | 0.18936  | 2.21609  | 1.1123  |
| DME05003   | 0.739   | 52.43721 | 44.97741 | 0        | 1.84104  | 0       |
| DME05007   | 1.00433 | 49.97576 | 47.97595 | 0        | 1.03511  | 0.00885 |
| DME05011   | 0.86055 | 42.79942 | 55.31789 | 0.75943  | 0.26271  | 0       |
| DME05024   | 6.68611 | 61.38365 | 30.9082  | 0        | 1.02204  | 0       |
| DME05082   | 1.09872 | 41.60221 | 53.08613 | 1.34795  | 2.79433  | 0.05203 |
| DME05099   | 0.02667 | 67.6944  | 30.25174 | 0        | 1.96351  | 0       |
| DME05101   | 2.46907 | 81.01964 | 16.10226 | 0        | 0.40904  | 0       |
| DME05111   | 0.74085 | 60.00586 | 37.18607 | 0        | 2.06534  | 0       |
| DME05113   | 5.65455 | 25.5612  | 66.39417 | 0.11654  | 2.27355  | 0       |
| DME05114   | 2.90321 | 23.43224 | 69.85382 | 0        | 3.81073  | 0       |
| DME05267   | 0.0009  | 42.17479 | 47.09479 | 1.01224  | 9.71729  | 0       |
| DME05321   | 0.36538 | 58.6524  | 37.82681 | 0        | 3.12214  | 0       |
| DME05322   | 0.21173 | 38.08199 | 30.85165 | 29.99283 | 0.8618   | 0       |
| DME05323   | 0.83329 | 40.13987 | 40.31203 | 2.18663  | 16.18012 | 0       |
| DME05330   | 0.12863 | 69.91101 | 28.91223 | 0.03955  | 1.00858  | 0       |
| DME05333   | 1.74477 | 36.85406 | 58.50508 | 0.01961  | 2.87647  | 0       |
| DME05340   | 1.90626 | 58.53124 | 28.15707 | 4.82215  | 6.58329  | 0       |
| DME05475   | 0.26315 | 84.19311 | 9.22928  | 3.50017  | 1.29369  | 0       |
| DME05493   | 0.47154 | 56.69644 | 42.80044 | 0        | 0.03159  | 0       |
| DME05506   | 0.75249 | 29.9832  | 68.26272 | 0        | 1.00159  | 0       |
| DME05510   | 1.12717 | 69.13644 | 28.50998 | 0        | 1.17214  | 0.05426 |
| DME05517   | 0.50214 | 63.90368 | 35.10639 | 0        | 0.48779  | 0       |
| DME05522   | 4.68279 | 63.01434 | 30.35276 | 1.22153  | 0.70574  | 0       |
| DME05540   | 0.35657 | 60.86897 | 37.64591 | 0        | 1.12855  | 0       |
| DME05571   | 0.13013 | 73.60667 | 19.18258 | 3.53641  | 3.54422  | 0       |
| DME05580   | 0.88126 | 71.32305 | 24.27314 | 0        | 1.52812  | 1.99444 |
| DME05582   | 1.1208  | 73.3668  | 24.50309 | 0        | 0.98496  | 0       |
| DME05597   | 0.63692 | 52.70317 | 41.97465 | 0        | 4.68527  | 0       |
| DME05715   | 1.69504 | 10.96057 | 86.55074 | 0        | 0.79365  | 0       |
| DME05794   | 1.44782 | 7.94506  | 81.31344 | 6.84339  | 2.45029  | 0       |
| DME05915   | 0.40579 | 59.97132 | 36.4797  | 0        | 0.65139  | 2.48742 |
| DME05932   | 1.78716 | 59.66849 | 35.28194 | 0        | 2.2285   | 0.00801 |
| DME05936   | 3.05174 | 55.25149 | 38.26525 | 0.70368  | 2.68956  | 0       |

|            |          |          |          |         |          |         |
|------------|----------|----------|----------|---------|----------|---------|
| DME05948   | 0.5947   | 57.26645 | 41.07043 | 0       | 0.71954  | 0       |
| DME05949   | 0.53281  | 61.85864 | 36.36975 | 0.62385 | 0.61495  | 0       |
| DME05951   | 0.08428  | 65.24413 | 31.27444 | 0.05195 | 3.34521  | 0       |
| DME05960   | 0.23353  | 51.26901 | 29.78876 | 3.37502 | 15.31231 | 0       |
| DME06157   | 0.75705  | 49.65895 | 48.51265 | 0       | 1.07135  | 0       |
| DME06160   | 0.32967  | 81.95953 | 12.33961 | 0       | 4.9964   | 0       |
| DME06202   | 1.68654  | 40.13644 | 53.46667 | 0       | 2.3232   | 2.21349 |
| DME06210   | 0.88772  | 59.22112 | 36.58884 | 0.01703 | 3.28529  | 0       |
| DME06211   | 9.57384  | 34.84036 | 53.9008  | 0       | 1.685    | 0       |
| DME06217   | 2.90335  | 43.92896 | 52.64202 | 0       | 0.51307  | 0       |
| DME06218   | 3.94359  | 59.68694 | 34.76484 | 0       | 1.45468  | 0       |
| DME06220   | 0.25191  | 75.26629 | 21.88473 | 0.21471 | 2.38236  | 0       |
| DME06223   | 0.6998   | 50.5544  | 47.94921 | 0.0448  | 0.73099  | 0       |
| DME06230   | 1.25524  | 72.40882 | 25.62575 | 0       | 0.70128  | 0       |
| DME06231   | 2.97565  | 39.16879 | 56.18525 | 0       | 1.67031  | 0       |
| DME06232   | 0.53758  | 50.30235 | 47.16616 | 0.25247 | 1.73684  | 0       |
| DME06233   | 0.66274  | 60.96649 | 37.67105 | 0       | 0.69972  | 0       |
| DME06234   | 1.07445  | 51.19885 | 47.09398 | 0.26511 | 0.34141  | 0       |
| DME06243   | 0.41316  | 29.03315 | 70.03472 | 0       | 0.49571  | 0.02326 |
| DME06252   | 0.17565  | 52.98873 | 41.26859 | 0.03561 | 5.51482  | 0       |
| DME06268   | 1.17316  | 74.66369 | 21.12937 | 0       | 3.03378  | 0       |
| DME06288   | 0.2324   | 33.54765 | 61.71309 | 3.40739 | 1.0938   | 0       |
| DME06298   | 1.22958  | 56.55176 | 37.16835 | 0.0069  | 2.56936  | 2.47405 |
| DME06338   | 1.16242  | 44.6987  | 50.96161 | 2.0175  | 1.15466  | 0.00511 |
| DME06344   | 18.77458 | 18.40746 | 61.74361 | 0       | 0.68555  | 0.3598  |
| DME06345   | 6.95992  | 18.88447 | 63.89805 | 0       | 10.20586 | 0       |
| DME06384-w | 1.14885  | 3.46067  | 94.34745 | 0       | 0.47735  | 0       |
| DME06449   | 3.39474  | 0.56047  | 95.41921 | 0       | 0.57659  | 0       |
| DME06463   | 20.33157 | 0.68565  | 78.6906  | 0       | 0.06301  | 0       |
| DME06533   | 0.62526  | 42.27324 | 55.28519 | 0       | 1.14264  | 0.67366 |
| DME06539   | 0.19895  | 65.78865 | 18.79382 | 7.4132  | 7.7919   | 0       |
| DME06676   | 2.3311   | 64.84129 | 31.6399  | 0.1097  | 0.85556  | 0.22246 |
| DME06681   | 16.17533 | 40.21566 | 41.36126 | 0       | 0.30819  | 1.93956 |
| DSFP00812  | 0.96764  | 72.99103 | 23.1417  | 0.69304 | 1.47643  | 0       |
| DSFP00934  | 0.14246  | 61.26903 | 36.6894  | 0.05287 | 1.74428  | 0       |
| DSFP00988  | 0.15666  | 75.28506 | 11.73161 | 0.07939 | 12.61831 | 0       |
| 90042801   | 0.18994  | 22.38328 | 22.22735 | 0       | 55.19942 | 0       |
| 90043608   | 0.40295  | 69.33012 | 26.59665 | 0       | 3.28194  | 0.21669 |
| DME03089   | 6.55779  | 14.26674 | 61.66301 | 0       | 17.47931 | 0       |
| DME03100   | 4.55438  | 62.15373 | 27.07165 | 0       | 6.22023  | 0       |
| DME03107-w | 1.95151  | 33.72526 | 58.69568 | 0.01299 | 3.42026  | 0       |
| DME03110   | 1.1006   | 68.18427 | 18.66418 | 0       | 12.05095 | 0       |
| DME03119   | 1.95294  | 61.87574 | 27.26979 | 0       | 8.88458  | 0       |
| DME03127   | 3.57748  | 57.64489 | 31.16    | 0       | 7.60096  | 0       |
| DME03134   | 0.68007  | 30.46898 | 13.65161 | 0.09259 | 55.10675 | 0       |
| DME03146   | 0.63233  | 68.30384 | 22.62968 | 1.00878 | 7.42537  | 0       |

|            |         |          |          |         |          |         |
|------------|---------|----------|----------|---------|----------|---------|
| DME03153   | 0.48857 | 72.42723 | 26.05074 | 0.0811  | 0.95237  | 0       |
| DME03157   | 0.68589 | 88.87948 | 8.2387   | 0       | 2.19593  | 0       |
| DME03158   | 1.40801 | 70.80738 | 24.40029 | 0.11764 | 3.26668  | 0       |
| DME03163   | 0.21608 | 71.7592  | 24.54263 | 1.06764 | 2.41446  | 0       |
| DME03164   | 1.5594  | 58.72435 | 37.44687 | 0       | 2.24551  | 0       |
| DME03166   | 0.76483 | 55.86706 | 42.74548 | 0       | 0.39354  | 0       |
| DME03175   | 0.52324 | 67.135   | 18.03043 | 0.42591 | 13.88543 | 0       |
| DME03186   | 3.74458 | 19.21974 | 18.17855 | 0.11155 | 58.74558 | 0       |
| DME03187   | 0.81916 | 31.13491 | 48.55009 | 8.22871 | 11.26712 | 0       |
| DME03195   | 2.88382 | 76.30011 | 10.09407 | 0       | 10.72201 | 0       |
| DME03212   | 1.57066 | 63.83782 | 30.99853 | 2.4974  | 1.09558  | 0       |
| DME03213   | 0.53203 | 56.55739 | 38.61619 | 3.32314 | 0.97125  | 0       |
| DME03214   | 2.56054 | 74.85137 | 19.71556 | 0.03223 | 2.8403   | 0       |
| DME03217-w | 0.73817 | 56.93298 | 40.859   | 0.00647 | 1.29458  | 0.04961 |
| DME03222   | 9.91926 | 56.31434 | 29.373   | 0       | 4.3934   | 0       |
| DME03241   | 1.22173 | 12.1466  | 9.50319  | 0.00998 | 77.05232 | 0       |
| DME03242   | 0.44918 | 65.72098 | 32.38215 | 0       | 1.44769  | 0       |
| DME03248   | 1.68164 | 36.60967 | 54.03205 | 0       | 7.67664  | 0       |
| DME03259   | 3.37227 | 73.50651 | 18.67177 | 0       | 4.44945  | 0       |
| DME03260   | 0.39481 | 76.38519 | 19.82282 | 0.07378 | 3.3234   | 0       |
| DME03264   | 0.58038 | 86.68945 | 11.94764 | 0.11464 | 0.66789  | 0       |
| DME03338   | 2.29365 | 81.89573 | 14.35019 | 0       | 1.46043  | 0       |
| DME03350   | 4.75873 | 47.06609 | 42.5058  | 0       | 5.632    | 0       |
| DME03358   | 2.79727 | 46.52155 | 44.20616 | 0.02183 | 6.38121  | 0       |
| DME03365   | 0.78329 | 24.40951 | 9.83994  | 0       | 64.96727 | 0       |
| DME03367   | 0.79025 | 71.49304 | 23.84026 | 0.19553 | 3.66976  | 0.01115 |
| DME03383   | 0.75189 | 38.42376 | 56.66493 | 0       | 4.15941  | 0       |
| DME03401   | 1.61469 | 80.202   | 14.32865 | 0       | 3.85466  | 0       |
| DME03405   | 0.22587 | 70.07936 | 26.9513  | 0       | 2.74347  | 0       |
| DME03409   | 2.22487 | 55.36114 | 39.62347 | 0       | 2.7129   | 0.07761 |
| DME03413   | 0.33181 | 76.28124 | 22.99156 | 0       | 0.39293  | 0.00245 |
| DME03475   | 0.02996 | 79.49011 | 15.41569 | 3.58341 | 1.46002  | 0       |
| DME03477   | 5.13369 | 65.6785  | 15.05455 | 0       | 14.13238 | 0       |
| DME03481   | 0.02915 | 83.83897 | 9.5928   | 0.03863 | 6.50046  | 0       |
| DME03487   | 2.49388 | 77.42157 | 15.56571 | 0       | 4.51884  | 0       |
| DME03493   | 6.64922 | 56.78066 | 27.52484 | 0.0155  | 9.0275   | 0       |
| DME03497   | 1.34959 | 64.01306 | 32.56705 | 0       | 2.06275  | 0       |
| DME03520   | 0.01892 | 56.71218 | 6.73135  | 7.90047 | 28.63708 | 0       |
| DME03539-W | 0.43106 | 18.94504 | 63.8622  | 14.9012 | 0.55144  | 0       |
| DME03901   | 0.8566  | 67.48777 | 30.75761 | 0       | 0.89801  | 0       |
| DME03916   | 0.0249  | 59.68317 | 38.29121 | 0       | 2.00073  | 0       |
| DME03947   | 0.38795 | 20.81485 | 77.97436 | 0       | 0.8209   | 0       |
| DME03950   | 1.86756 | 48.62223 | 41.98334 | 0.02977 | 7.4971   | 0       |
| DME03979   | 1.49651 | 78.46447 | 18.35052 | 0       | 1.67844  | 0       |
| DME03984   | 3.18133 | 28.10519 | 64.4852  | 0.77585 | 3.44534  | 0       |
| DME03988   | 1.51474 | 68.45131 | 29.2368  | 0       | 0.79406  | 0       |

|              |         |          |          |          |          |         |
|--------------|---------|----------|----------|----------|----------|---------|
| DME03989     | 0.29056 | 69.70598 | 26.17099 | 0        | 3.83247  | 0       |
| DME04000     | 1.07232 | 18.30885 | 59.39974 | 2.54647  | 18.66951 | 0       |
| DME04014     | 0.81305 | 64.87808 | 31.52857 | 0.07382  | 2.70648  | 0       |
| DME04716     | 0.16304 | 69.34559 | 27.39347 | 0.00384  | 3.09406  | 0       |
| DME04727     | 1.2332  | 53.58536 | 31.29904 | 12.26917 | 1.61323  | 0       |
| DME04749     | 0.56209 | 61.49907 | 37.32516 | 0        | 0.5239   | 0.08978 |
| DME04750     | 0.08105 | 68.19687 | 31.63547 | 0.00891  | 0.06235  | 0       |
| DME04755     | 0.73961 | 45.03019 | 52.40254 | 0        | 1.82766  | 0       |
| DME04765     | 0.17685 | 46.94975 | 52.50218 | 0.00659  | 0.36463  | 0       |
| DME04771     | 0.33436 | 86.77303 | 10.54548 | 0        | 2.34713  | 0       |
| DME04788     | 0.69201 | 53.31422 | 43.51211 | 0.0264   | 2.45527  | 0       |
| DME04812-w   | 0.30906 | 55.75009 | 42.00405 | 0.28475  | 1.65205  | 0       |
| DME04844     | 0.96556 | 23.8788  | 72.04667 | 0        | 3.10896  | 0       |
| DME04897     | 3.83908 | 43.49638 | 47.78194 | 3.49706  | 1.38554  | 0       |
| DME04902     | 4.39769 | 52.70972 | 39.16766 | 0        | 3.72105  | 0       |
| DME04906     | 1.00955 | 46.52364 | 44.40136 | 0        | 7.39476  | 0.6707  |
| DME04928     | 1.5645  | 50.76579 | 23.81562 | 21.22326 | 2.47691  | 0.06909 |
| DME04933     | 0.67502 | 63.19501 | 34.81778 | 0.00157  | 1.31062  | 0       |
| DME05009     | 7.69733 | 30.32726 | 61.21151 | 0        | 0.59583  | 0       |
| DME05026     | 0.16389 | 60.0892  | 37.38878 | 1.13069  | 0.87043  | 0.35701 |
| DME05032     | 1.35228 | 49.82681 | 39.64019 | 0.16672  | 9.014    | 0       |
| DME05318     | 0.08039 | 61.19595 | 38.33205 | 0        | 0.38488  | 0.00672 |
| DME05320     | 5.98543 | 61.89987 | 30.75458 | 0        | 1.36013  | 0       |
| DME05324     | 0.3568  | 43.96803 | 37.01094 | 17.95748 | 0.70675  | 0       |
| DME05326     | 1.5242  | 59.20851 | 37.59159 | 0        | 1.5842   | 0       |
| DME05331     | 0.67681 | 80.33142 | 15.08997 | 3.35091  | 0.55089  | 0       |
| DME05336     | 1.21542 | 71.93326 | 26.54335 | 0        | 0.30797  | 0       |
| DME05342-c-w | 0.24502 | 29.73481 | 60.74685 | 2.72389  | 6.53758  | 0.0075  |
| DME05344     | 0.85298 | 82.05606 | 15.82378 | 0        | 1.24823  | 0.01896 |
| DME05465-w   | 0.30057 | 38.20449 | 59.3643  | 0.32247  | 1.80817  | 0       |
| DME05471     | 1.45606 | 41.48475 | 52.85072 | 0        | 3.71946  | 0       |
| DME05485     | 0.57088 | 41.05301 | 57.62009 | 0.01845  | 0.73758  | 0       |
| DME05488     | 0.14513 | 65.54647 | 33.51842 | 0        | 0.78998  | 0       |
| DME05489     | 0.18763 | 61.91103 | 37.1114  | 0        | 0.78994  | 0       |
| DME05496     | 1.02797 | 47.07935 | 33.97033 | 1.52734  | 16.39501 | 0       |
| DME05499     | 1.24806 | 59.89666 | 35.14054 | 1.88143  | 1.83135  | 0.00196 |
| DME05513     | 0.75502 | 34.28767 | 64.23734 | 0.08005  | 0.62414  | 0       |
| DME05537     | 0.97854 | 59.9501  | 27.01499 | 0.09886  | 11.94294 | 0       |
| DME05547     | 0.16822 | 57.76724 | 38.88019 | 2.25166  | 0.84389  | 0.07804 |
| DME05556     | 0.44858 | 62.22964 | 36.54151 | 0        | 0.78027  | 0       |
| DME05558     | 2.00189 | 36.35938 | 48.83954 | 11.61876 | 1.17498  | 0       |
| DME05576     | 0.55091 | 53.07704 | 45.64325 | 0.13179  | 0.59701  | 0       |
| DME05581     | 0.07389 | 79.36731 | 18.52154 | 0.80241  | 1.22712  | 0       |
| DME05591     | 0.12367 | 83.86209 | 14.47029 | 0.79733  | 0.74544  | 0.00118 |
| DME05601     | 0.49223 | 64.39173 | 34.0436  | 0        | 1.05755  | 0.01489 |
| DME05606     | 1.93555 | 55.72817 | 35.9246  | 1.05947  | 5.19127  | 0       |



|             |          |          |          |          |          |         |
|-------------|----------|----------|----------|----------|----------|---------|
| DME05611    | 0.23088  | 41.60714 | 32.32335 | 0.05085  | 25.78779 | 0       |
| DME05720    | 2.23295  | 52.70083 | 43.88917 | 0        | 0.96949  | 0.20755 |
| DME05722    | 0.16403  | 45.55594 | 53.03612 | 0        | 1.16621  | 0       |
| DME05793    | 25.89284 | 1.32705  | 71.46443 | 0.24357  | 0.66569  | 0       |
| DME05801    | 5.69397  | 51.85719 | 40.88264 | 0.22568  | 1.33888  | 0.00165 |
| DME05808-w  | 0.84436  | 34.29299 | 48.03291 | 11.37698 | 5.35648  | 0.00255 |
| DME05814    | 0.05765  | 40.51813 | 58.72006 | 0        | 0.6043   | 0.08557 |
| DME05816    | 3.03564  | 34.08536 | 60.47877 | 0        | 2.38587  | 0       |
| DME05907    | 0.22871  | 83.03946 | 16.0681  | 0.32747  | 0.33626  | 0       |
| DME05916    | 0.15694  | 80.18824 | 18.80394 | 0.33549  | 0.51539  | 0       |
| DME05950    | 0.43349  | 70.99658 | 26.23116 | 0.05835  | 2.23623  | 0       |
| DME05962    | 10.55319 | 7.30199  | 59.23673 | 0.00232  | 22.82277 | 0       |
| DME05975    | 0.72892  | 55.82574 | 42.07506 | 0        | 1.26312  | 0.09969 |
| DME06015    | 3.53295  | 26.50091 | 67.78609 | 0        | 2.14736  | 0.01357 |
| DME06043    | 0.10941  | 74.88067 | 23.08544 | 0.37098  | 1.55293  | 0       |
| DME06187    | 0.04106  | 77.0895  | 19.69616 | 1.95665  | 1.21663  | 0       |
| DME06192    | 0.91683  | 75.83388 | 19.19782 | 2.4935   | 1.54834  | 0       |
| DME06200    | 1.2406   | 58.37792 | 39.00369 | 0.11021  | 0.99211  | 0.27358 |
| DME06213    | 1.53035  | 66.87786 | 16.68546 | 8.89523  | 5.96843  | 0       |
| DME06226    | 0.66103  | 66.22965 | 29.52735 | 0.0981   | 3.46485  | 0       |
| DME06227    | 1.814    | 50.65571 | 43.26313 | 1.06775  | 3.19276  | 0       |
| DME06253-w  | 0.9111   | 2.53189  | 56.10339 | 0.01132  | 39.95164 | 0.00201 |
| DME06274-w  | 0.28641  | 69.78031 | 26.73163 | 0.85408  | 2.34756  | 0       |
| DME06289-w  | 0.05907  | 39.19935 | 45.0862  | 0.01932  | 15.61374 | 0       |
| DME06305    | 0.50571  | 60.60215 | 37.868   | 0.03204  | 0.99209  | 0       |
| DME06340    | 0.03746  | 79.79097 | 14.06714 | 0.01815  | 5.82752  | 0       |
| DME06343    | 2.08051  | 1.08978  | 95.75842 | 0.01411  | 0.99886  | 0       |
| DME06385    | 0.17027  | 43.20707 | 38.84174 | 7.41308  | 10.04999 | 0       |
| DME06446    | 0.05468  | 17.6763  | 81.34103 | 0        | 0.92799  | 0       |
| DME06460    | 0.72771  | 47.24441 | 41.20027 | 0        | 10.65118 | 0       |
| DME06679    | 4.93082  | 62.87483 | 30.99621 | 0        | 1.19814  | 0       |
| DME06694-w  | 0.34793  | 83.8602  | 14.23169 | 0.07587  | 1.4843   | 0       |
| DME06696    | 0.7329   | 84.54112 | 13.66517 | 0        | 0.9655   | 0       |
| DSFP01038-w | 0.1953   | 41.27053 | 51.25481 | 6.31414  | 0.728    | 0       |
| DSFP01047   | 3.0871   | 83.61676 | 9.12507  | 0        | 4.17107  | 0       |
| DSFP01085   | 6.19556  | 43.18902 | 48.57649 | 0        | 1.99481  | 0       |
| 90043293    | 0.88232  | 41.57698 | 56.76351 | 0        | 0.77379  | 0       |
| DME03082    | 0.30387  | 64.59275 | 25.89117 | 0        | 9.21221  | 0       |
| DME03511    | 0.36217  | 59.15341 | 30.40431 | 0        | 10.04901 | 0       |
| DME04097    | 1.11446  | 53.81251 | 41.49667 | 0.03035  | 3.54601  | 0       |
| DME04099    | 0.6055   | 53.10801 | 38.18811 | 0        | 5.03565  | 3.06273 |
| DME04101-1  | 1.02475  | 64.2825  | 33.64346 | 0        | 1.03922  | 0.01008 |
| DME04102    | 0.59053  | 57.31279 | 39.33936 | 0.0649   | 2.69242  | 0       |
| DME04104-1  | 22.38633 | 0.97271  | 76.62173 | 0        | 0.01331  | 0       |
| DME04105    | 2.48404  | 58.54399 | 35.35974 | 0        | 3.60848  | 0.00129 |
| DME04107    | 21.6893  | 9.95963  | 67.80074 | 0        | 0.55034  | 0       |

|              |          |          |          |         |          |          |
|--------------|----------|----------|----------|---------|----------|----------|
| DME04108     | 1.95928  | 55.39287 | 40.30672 | 0       | 2.33917  | 0.00197  |
| DME04176-1   | 1.00182  | 81.56204 | 15.35679 | 0       | 2.07936  | 0        |
| DME04177     | 2.40249  | 32.44307 | 63.49528 | 0       | 1.46775  | 0        |
| DME04181     | 0.7458   | 83.91415 | 14.15581 | 0       | 1.18424  | 0        |
| DME04182-w   | 1.29822  | 5.74388  | 85.35167 | 0       | 0.2261   | 0        |
| DME04184-1   | 0.66964  | 33.90051 | 63.65286 | 0       | 1.77698  | 0        |
| DME04189-1   | 1.2854   | 61.30208 | 35.88859 | 0       | 1.51877  | 0        |
| DME04234     | 6.44053  | 8.03744  | 82.13299 | 0       | 3.38383  | 0        |
| DME04236     | 2.64245  | 53.79899 | 36.41322 | 0       | 4.1335   | 1.82789  |
| DME04238     | 1.87454  | 34.02994 | 57.34214 | 0       | 6.09869  | 0.6547   |
| DME04240     | 20.17267 | 33.29407 | 45.20734 | 0       | 1.32592  | 0        |
| DME04241     | 1.78145  | 48.91448 | 35.90023 | 0       | 1.05595  | 11.18612 |
| DME04243     | 0.40165  | 27.37338 | 71.01565 | 0       | 1.20932  | 0        |
| DME04417     | 0.45028  | 0.22203  | 75.72967 | 0       | 23.58896 | 0        |
| DME04418     | 1.37839  | 1.85774  | 96.03697 | 0       | 0.61773  | 0.00438  |
| DME04422     | 1.07982  | 61.23779 | 35.86762 | 0.10624 | 1.67543  | 0        |
| DME04430     | 23.0227  | 1.01371  | 75.58636 | 0       | 0.16976  | 0        |
| DME04432     | 8.20235  | 0.8925   | 75.46283 | 0       | 15.31017 | 0        |
| DME04464     | 1.39165  | 35.72577 | 58.5684  | 1.6762  | 1.41302  | 1.11422  |
| DME04471     | 3.30546  | 34.87214 | 45.21292 | 0       | 16.56921 | 0        |
| DME04473     | 2.9103   | 57.86081 | 33.37553 | 0       | 4.75639  | 0.65035  |
| DME04474     | 1.84058  | 72.96636 | 24.28293 | 0       | 0.91013  | 0        |
| DME04476     | 1.86939  | 60.29029 | 30.50992 | 0       | 4.57365  | 2.75675  |
| DME04478     | 5.15225  | 56.71302 | 34.0136  | 0.0449  | 4.07623  | 0        |
| DME04489     | 11.50388 | 57.39091 | 24.45935 | 0.24045 | 6.35935  | 0        |
| DME04492     | 3.13571  | 35.06061 | 59.25297 | 1.37845 | 1.15157  | 0.02069  |
| DME04499     | 1.1269   | 72.3326  | 26.12623 | 0       | 0.41427  | 0        |
| DME04501     | 8.95838  | 56.19954 | 28.41767 | 0       | 5.70687  | 0        |
| DME04502     | 1.08609  | 53.64217 | 41.99707 | 0       | 2.55259  | 0.02849  |
| DME04504     | 1.56277  | 48.72463 | 44.16582 | 0       | 5.53617  | 0        |
| DME03092     | 11.78986 | 31.69282 | 13.05645 | 0       | 42.41221 | 0        |
| DME04088     | 2.43855  | 29.86088 | 65.27745 | 0       | 2.39904  | 0        |
| DME04090     | 0.22327  | 76.79262 | 15.83456 | 0       | 7.09778  | 0        |
| DME04098     | 6.9976   | 34.69823 | 56.5215  | 0       | 1.77819  | 0.00182  |
| DME04179     | 0.18793  | 35.49788 | 61.0669  | 0       | 3.24729  | 0        |
| DME04180-1   | 0.87755  | 52.09485 | 41.46173 | 0.40231 | 5.15256  | 0        |
| DME04185-1-w | 7.3396   | 26.95742 | 65.45875 | 0       | 0.24423  | 0        |
| DME04193     | 0.09524  | 52.41713 | 46.24188 | 0       | 1.23265  | 0.01005  |
| DME04233     | 1.84134  | 81.10201 | 10.92332 | 4.44287 | 1.69047  | 0        |
| DME04433     | 20.18702 | 0.45895  | 60.51855 | 0       | 0.30546  | 18.49298 |
| DME04434-w   | 11.42307 | 2.43574  | 85.53821 | 0       | 0.54643  | 0.01727  |
| DME04463     | 3.01492  | 10.39387 | 85.11485 | 0.06588 | 0.6383   | 0.76103  |
| DME04477     | 9.55808  | 5.08581  | 84.73416 | 0.00679 | 0.48754  | 0        |
| DME04481     | 3.31193  | 21.65991 | 74.0405  | 0       | 0.98766  | 0        |
| DME04485     | 0.94482  | 76.99094 | 20.39155 | 0       | 1.67269  | 0        |
| DME04543-w   | 3.51247  | 67.36147 | 25.41172 | 0       | 3.69086  | 0.02348  |

|             |          |          |          |          |          |         |
|-------------|----------|----------|----------|----------|----------|---------|
| DME04645    | 4.17975  | 67.28108 | 23.03457 | 1.0312   | 4.46006  | 0.00294 |
| DME05280    | 0.22514  | 70.09869 | 17.72413 | 6.19968  | 5.75236  | 0       |
| DME05351    | 0.40949  | 58.19768 | 36.33821 | 0.70054  | 4.34844  | 0       |
| DME05369    | 1.92715  | 20.37347 | 75.35518 | 0.30375  | 2.03405  | 0       |
| DME05371    | 23.30231 | 5.76893  | 68.00375 | 0.00429  | 0.44492  | 2.40208 |
| DME05732-W  | 1.18443  | 0.5239   | 92.76718 | 0.03848  | 2.48496  | 0       |
| DME05818    | 9.42836  | 0.2807   | 89.35084 | 0        | 0.84757  | 0       |
| DME05856    | 0.26398  | 69.54206 | 16.0849  | 11.70108 | 1.73278  | 0.6752  |
| DME06325    | 4.47602  | 0.46038  | 69.86319 | 0.00057  | 24.35158 | 0       |
| DME06332-w  | 0.76623  | 45.5473  | 47.95963 | 0        | 5.70043  | 0       |
| DME06396-w  | 0.39704  | 40.37844 | 58.22797 | 0        | 0.99655  | 0       |
| DME06404    | 1.37632  | 8.02825  | 88.0423  | 0.00115  | 1.19954  | 0       |
| DME06423-w  | 3.34467  | 9.66066  | 65.40608 | 0.14999  | 0.98441  | 0       |
| DME06448    | 0.04171  | 4.79052  | 67.14019 | 0        | 27.76847 | 0       |
| DSFP01031-w | 29.16949 | 8.85609  | 60.56791 | 0        | 1.02677  | 0.00165 |
| DSFP01070   | 6.04728  | 0.84857  | 92.97042 | 0        | 0.11311  | 0       |
| DSFP01080   | 3.4297   | 0.40391  | 95.83422 | 0        | 0.1162   | 0       |

**Table S5. The significantly different functional categories in KEGG annotation**

| Levels2_KEGG                                    | Levels3_KEGG                                    | Mean.H_O_C<br>Q | SD.H_O_CQ | Mean.O_Met<br>s_CQ | SD.O_Mets_C<br>Q | p.value     |
|-------------------------------------------------|-------------------------------------------------|-----------------|-----------|--------------------|------------------|-------------|
| Amino_acid_metabolism                           | Phenylalanine_metabolism                        | 0.201311        | 0.023189  | 0.208362           | 0.025602         | 0.008356492 |
| Biosynthesis_of_other_secon<br>dary_metabolites | Acarbose_and_validamycin_biosynthesis           | 0.093087        | 0.016296  | 0.098576           | 0.017943         | 0.001917721 |
| Biosynthesis_of_other_secon<br>dary_metabolites | Isoquinoline_alkaloid_biosynthesis              | 0.048464        | 0.009906  | 0.050874           | 0.009502         | 0.00754589  |
| Biosynthesis_of_other_secon<br>dary_metabolites | Flavone_and_flavonol_biosynthesis               | 0.01758         | 0.004751  | 0.016267           | 0.005099         | 0.002682446 |
| Biosynthesis_of_other_secon<br>dary_metabolites | Betalain_biosynthesis                           | 0.001672        | 0.001999  | 0.002634           | 0.002332         | 2.29E-06    |
| Biosynthesis_of_other_secon<br>dary_metabolites | Indole_alkaloid_biosynthesis                    | 0.000632        | 0.000861  | 0.001193           | 0.001337         | 2.10E-05    |
| Carbohydrate_metabolism                         | Amino_sugar_and_nucleotide_sugar_metabolism     | 1.622539        | 0.125568  | 1.667037           | 0.119377         | 0.001172503 |
| Carbohydrate_metabolism                         | Galactose_metabolism                            | 1.158501        | 0.118971  | 1.193294           | 0.114551         | 0.010635822 |
| Carbohydrate_metabolism                         | Fructose_and_mannose_metabolism                 | 0.839701        | 0.079565  | 0.866485           | 0.082624         | 0.007153971 |
| Carbohydrate_metabolism                         | Pentose_and_glucuronate_interconversions        | 0.589214        | 0.073149  | 0.612665           | 0.073236         | 0.012254934 |
| Carbohydrate_metabolism                         | Propanoate_metabolism                           | 0.517893        | 0.056035  | 0.538205           | 0.062377         | 0.003481951 |
| Carbohydrate_metabolism                         | Inositol_phosphate_metabolism                   | 0.136192        | 0.017998  | 0.143807           | 0.022519         | 0.002089638 |
| Carbohydrate_metabolism                         | Ascorbate_and_aldarate_metabolism               | 0.098246        | 0.020286  | 0.104835           | 0.022049         | 0.004750767 |
| Glycan_biosynthesis_and_me<br>tabolism          | Other_glycan_degradation                        | 0.631132        | 0.102519  | 0.664573           | 0.106414         | 0.006252914 |
| Glycan_biosynthesis_and_me<br>tabolism          | Lipopolysaccharide_biosynthesis                 | 0.171253        | 0.040674  | 0.193123           | 0.044908         | 1.52E-05    |
| Glycan_biosynthesis_and_me<br>tabolism          | Glycosphingolipid_biosynthesis_-_ganglio_series | 0.090716        | 0.023446  | 0.099738           | 0.026496         | 0.001852668 |
| Glycan_biosynthesis_and_me<br>tabolism          | N-Glycan_biosynthesis                           | 0.055041        | 0.007802  | 0.052466           | 0.006942         | 0.00222773  |
| Lipid_metabolism                                | Glycerophospholipid_metabolism                  | 0.459346        | 0.029885  | 0.45056            | 0.031361         | 0.007236381 |
| Lipid_metabolism                                | Primary_bile_acid_biosynthesis                  | 0.040859        | 0.004825  | 0.039401           | 0.004007         | 0.00857898  |
| Lipid_metabolism                                | Steroid_biosynthesis                            | 0.008917        | 0.003477  | 0.007378           | 0.002842         | 3.87E-05    |
| Lipid_metabolism                                | Arachidonic_acid_metabolism                     | 0.006636        | 0.003077  | 0.0078             | 0.003438         | 0.000321435 |
| Lipid_metabolism                                | alpha-Linolenic_acid_metabolism                 | 0.003719        | 0.002152  | 0.004476           | 0.002383         | 0.002604848 |
| Lipid_metabolism                                | Fatty_acid_elongation                           | 0.001908        | 0.000764  | 0.001681           | 0.000817         | 0.002208846 |

|                                           |                                                         |          |          |          |          |             |
|-------------------------------------------|---------------------------------------------------------|----------|----------|----------|----------|-------------|
| Metabolism_of_cofactors_and_vitamins      | Biotin_metabolism                                       | 0.270008 | 0.02676  | 0.277764 | 0.026498 | 0.00813918  |
| Metabolism_of_cofactors_and_vitamins      | Folate_biosynthesis                                     | 0.253087 | 0.022392 | 0.265728 | 0.021434 | 3.67E-07    |
| Metabolism_of_cofactors_and_vitamins      | Riboflavin_metabolism                                   | 0.133266 | 0.016467 | 0.138967 | 0.016516 | 0.001959438 |
| Metabolism_of_cofactors_and_vitamins      | iquinone_and_other_terpenoid-quinone_biosynthe          | 0.115854 | 0.026517 | 0.124707 | 0.024514 | 0.001019784 |
| Metabolism_of_other_amino_acids           | beta-Alanine_metabolism                                 | 0.090883 | 0.014955 | 0.096312 | 0.015414 | 0.000192465 |
| Metabolism_of_other_amino_acids           | Phosphonate_and_phosphinate_metabolism                  | 0.071539 | 0.009115 | 0.074842 | 0.008888 | 0.001394623 |
| Metabolism_of_terpenoids_and_polyketides  | Polyketide_sugar_unit_biosynthesis                      | 0.173633 | 0.02632  | 0.180247 | 0.025862 | 0.003207294 |
| Metabolism_of_terpenoids_and_polyketides  | Tetracycline_biosynthesis                               | 0.070145 | 0.010518 | 0.073313 | 0.009608 | 0.005585182 |
| Metabolism_of_terpenoids_and_polyketides  | Biosynthesis_of_siderophore_group_nonribosomal_peptides | 0.019926 | 0.014622 | 0.021976 | 0.01128  | 0.003824155 |
| Metabolism_of_terpenoids_and_polyketides  | Biosynthesis_of_type_II_polyketide_products             | 0.009671 | 0.003113 | 0.008073 | 0.002839 | 4.61E-06    |
| Metabolism_of_terpenoids_and_polyketides  | Geraniol_degradation                                    | 0.006326 | 0.003514 | 0.007402 | 0.003858 | 0.000559011 |
| Metabolism_of_terpenoids_and_polyketides  | Carotenoid_biosynthesis                                 | 0.002457 | 0.001436 | 0.00195  | 0.001184 | 0.001529713 |
| Metabolism_of_terpenoids_and_polyketides  | Type_I_polyketide_structures                            | 0.002289 | 0.001049 | 0.002062 | 0.00113  | 0.012612859 |
| Xenobiotics_biodegradation_and_metabolism | Aminobenzoate_degradation                               | 0.072534 | 0.012183 | 0.077979 | 0.013077 | 7.35E-05    |
| Xenobiotics_biodegradation_and_metabolism | Fluorobenzoate_degradation                              | 0.003568 | 0.003614 | 0.004451 | 0.003396 | 0.000683946 |
| Xenobiotics_biodegradation_and_metabolism | Toluene_degradation                                     | 0.002606 | 0.002339 | 0.003286 | 0.002464 | 0.000586007 |

**Table S6. Relative abundance of co-abundance groups**

| ID     | Chongqing |          |          |          |          |          |                | Quanzhou |          |          |          |          |          |                |
|--------|-----------|----------|----------|----------|----------|----------|----------------|----------|----------|----------|----------|----------|----------|----------------|
|        | MHO_mean  | MHO_sd   | MUO_mean | MUO_sd   | p        | pfdr     | enriched group | MHO_mean | MHO_sd   | MUO_mean | MUO_sd   | p        | pfdr     | enriched group |
| CAG001 | 4.86E-05  | 9.57E-05 | 3.53E-05 | 1.59E-04 | 6.87E-04 | 8.95E-04 | MHO            | 5.22E-05 | 1.20E-04 | 1.76E-05 | 4.86E-05 | 7.04E-02 | 1.51E-01 | MHO            |
| CAG002 | 3.84E-05  | 1.26E-04 | 1.08E-05 | 5.60E-05 | 1.15E-05 | 6.19E-05 | MHO            | 2.45E-05 | 8.45E-05 | 5.86E-06 | 3.37E-05 | 5.60E-02 | 1.34E-01 | MHO            |
| CAG003 | 3.18E-05  | 7.90E-05 | 1.17E-04 | 4.14E-04 | 7.92E-06 | 4.87E-05 | MUO            | 5.41E-05 | 1.41E-04 | 7.64E-05 | 1.56E-04 | 7.25E-01 | 8.66E-01 | MUO            |
| CAG004 | 5.43E-05  | 4.73E-04 | 6.08E-06 | 1.48E-05 | 3.32E-07 | 1.43E-05 | MHO            | 2.91E-05 | 5.33E-05 | 5.06E-05 | 9.66E-05 | 6.19E-01 | 8.36E-01 | MUO            |
| CAG005 | 1.60E-05  | 4.64E-05 | 3.85E-05 | 1.51E-04 | 7.93E-04 | 1.00E-03 | MUO            | 2.37E-05 | 6.84E-05 | 6.44E-05 | 1.20E-04 | 5.55E-01 | 8.23E-01 | MUO            |
| CAG006 | 6.39E-05  | 1.79E-04 | 1.81E-04 | 5.41E-04 | 6.04E-04 | 8.38E-04 | MUO            | 9.28E-05 | 2.20E-04 | 2.13E-04 | 3.71E-04 | 3.91E-01 | 6.23E-01 | MUO            |
| CAG007 | 7.29E-05  | 1.14E-04 | 8.18E-05 | 5.78E-04 | 2.20E-05 | 8.00E-05 | MUO            | 7.48E-05 | 1.29E-04 | 1.46E-04 | 3.06E-04 | 8.61E-01 | 9.50E-01 | MUO            |
| CAG008 | 7.48E-05  | 4.77E-04 | 2.05E-05 | 4.59E-05 | 1.04E-04 | 2.14E-04 | MHO            | 3.21E-05 | 5.18E-05 | 4.40E-05 | 7.15E-05 | 6.87E-01 | 8.51E-01 | MUO            |
| CAG009 | 4.30E-05  | 9.57E-05 | 1.80E-04 | 7.11E-04 | 5.22E-06 | 4.87E-05 | MUO            | 5.48E-05 | 1.14E-04 | 1.53E-04 | 2.35E-04 | 9.07E-02 | 1.77E-01 | MUO            |
| CAG010 | 3.54E-05  | 1.20E-04 | 1.29E-04 | 3.98E-04 | 1.51E-05 | 7.22E-05 | MUO            | 4.84E-05 | 1.39E-04 | 1.43E-04 | 3.46E-04 | 6.43E-01 | 8.37E-01 | MUO            |
| CAG011 | 2.79E-05  | 7.98E-05 | 8.89E-06 | 4.85E-05 | 2.86E-05 | 8.18E-05 | MHO            | 1.89E-05 | 4.04E-05 | 7.42E-07 | 4.26E-06 | 4.99E-03 | 5.16E-02 | MHO            |
| CAG012 | 6.84E-05  | 5.21E-04 | 3.92E-05 | 5.13E-05 | 1.82E-01 | 1.82E-01 | MHO            | 5.32E-05 | 1.53E-04 | 7.44E-05 | 8.80E-05 | 7.96E-02 | 1.63E-01 | MUO            |
| CAG013 | 9.16E-05  | 1.33E-04 | 1.54E-04 | 1.69E-04 | 6.38E-04 | 8.58E-04 | MUO            | 4.41E-05 | 9.03E-05 | 1.15E-04 | 1.81E-04 | 6.36E-02 | 1.44E-01 | MUO            |
| CAG014 | 4.56E-05  | 1.89E-04 | 1.09E-04 | 2.81E-04 | 3.00E-03 | 3.11E-03 | MUO            | 3.74E-05 | 8.89E-05 | 1.50E-04 | 3.75E-04 | 3.43E-01 | 5.89E-01 | MUO            |
| CAG015 | 8.82E-05  | 2.32E-04 | 6.62E-05 | 3.81E-04 | 9.19E-05 | 2.08E-04 | MHO            | 1.61E-04 | 3.95E-04 | 6.99E-05 | 1.67E-04 | 9.75E-01 | 9.79E-01 | MHO            |
| CAG016 | 5.59E-05  | 1.73E-04 | 2.69E-05 | 8.07E-05 | 1.19E-04 | 2.32E-04 | MHO            | 4.56E-05 | 1.08E-04 | 3.18E-05 | 5.88E-05 | 9.41E-01 | 9.79E-01 | MHO            |
| CAG017 | 4.04E-04  | 1.21E-03 | 4.86E-04 | 1.14E-03 | 4.62E-04 | 7.03E-04 | MUO            | 2.71E-04 | 6.61E-04 | 1.30E-03 | 2.03E-03 | 2.05E-03 | 5.16E-02 | MUO            |
| CAG018 | 7.47E-05  | 2.33E-04 | 1.55E-04 | 4.02E-04 | 3.03E-03 | 3.11E-03 | MUO            | 1.21E-04 | 2.78E-04 | 3.64E-05 | 1.37E-04 | 2.45E-02 | 7.68E-02 | MHO            |
| CAG019 | 9.37E-05  | 5.24E-04 | 1.40E-04 | 2.50E-04 | 1.10E-03 | 1.24E-03 | MUO            | 6.08E-05 | 1.43E-04 | 1.02E-04 | 2.70E-04 | 6.22E-01 | 8.36E-01 | MUO            |
| CAG020 | 9.08E-05  | 2.02E-04 | 3.63E-05 | 7.86E-05 | 2.62E-05 | 8.06E-05 | MHO            | 1.12E-04 | 1.81E-04 | 3.21E-05 | 8.04E-05 | 1.53E-02 | 6.95E-02 | MHO            |
| CAG021 | 5.72E-05  | 1.21E-04 | 3.72E-05 | 1.57E-04 | 4.19E-04 | 6.68E-04 | MHO            | 5.33E-05 | 1.10E-04 | 1.80E-05 | 4.90E-05 | 4.99E-02 | 1.34E-01 | MHO            |
| CAG022 | 1.03E-04  | 3.63E-04 | 3.96E-05 | 7.61E-05 | 4.74E-04 | 7.03E-04 | MHO            | 7.01E-05 | 1.20E-04 | 7.47E-05 | 1.31E-04 | 8.28E-01 | 9.50E-01 | MUO            |
| CAG023 | 2.02E-04  | 7.87E-05 | 2.35E-04 | 7.24E-05 | 6.96E-06 | 4.87E-05 | MUO            | 2.12E-04 | 1.23E-04 | 2.94E-04 | 1.80E-04 | 5.79E-03 | 5.16E-02 | MUO            |
| CAG024 | 2.83E-05  | 4.84E-05 | 1.69E-05 | 6.99E-05 | 2.42E-05 | 8.00E-05 | MHO            | 4.16E-05 | 7.44E-05 | 7.98E-06 | 2.42E-05 | 7.80E-03 | 5.59E-02 | MHO            |
| CAG025 | 7.51E-05  | 5.10E-04 | 1.89E-05 | 4.94E-05 | 7.13E-06 | 4.87E-05 | MHO            | 5.81E-05 | 1.36E-04 | 2.09E-05 | 7.24E-05 | 2.40E-02 | 7.68E-02 | MHO            |
| CAG026 | 2.74E-04  | 1.26E-04 | 3.09E-04 | 9.57E-05 | 2.01E-05 | 8.00E-05 | MUO            | 2.89E-04 | 1.66E-04 | 3.76E-04 | 1.74E-04 | 6.00E-03 | 5.16E-02 | MUO            |
| CAG027 | 7.56E-05  | 1.83E-04 | 2.77E-05 | 6.52E-05 | 5.60E-06 | 4.87E-05 | MHO            | 1.37E-04 | 2.28E-04 | 1.31E-04 | 2.07E-04 | 8.39E-01 | 9.50E-01 | MHO            |
| CAG028 | 3.27E-05  | 8.64E-05 | 8.59E-05 | 2.89E-04 | 2.82E-03 | 3.03E-03 | MUO            | 4.22E-05 | 1.04E-04 | 8.79E-05 | 1.77E-04 | 3.56E-01 | 5.89E-01 | MUO            |

|        |          |          |          |          |          |          |     |          |          |          |          |          |          |     |
|--------|----------|----------|----------|----------|----------|----------|-----|----------|----------|----------|----------|----------|----------|-----|
| CAG029 | 5.78E-05 | 9.53E-05 | 3.08E-05 | 1.08E-04 | 1.31E-04 | 2.46E-04 | MHO | 1.49E-04 | 3.60E-04 | 1.51E-04 | 5.20E-04 | 1.96E-01 | 3.66E-01 | MUO |
| CAG030 | 3.36E-05 | 9.62E-05 | 1.29E-05 | 7.08E-05 | 5.07E-05 | 1.28E-04 | MHO | 3.03E-05 | 1.03E-04 | 9.42E-06 | 5.41E-05 | 5.60E-02 | 1.34E-01 | MHO |
| CAG031 | 4.10E-05 | 1.31E-04 | 8.91E-05 | 2.58E-04 | 9.56E-04 | 1.14E-03 | MUO | 4.40E-05 | 1.04E-04 | 1.06E-04 | 2.38E-04 | 3.49E-01 | 5.89E-01 | MUO |
| CAG032 | 2.95E-05 | 9.71E-05 | 7.34E-06 | 3.07E-05 | 1.00E-03 | 1.16E-03 | MHO | 1.60E-05 | 3.76E-05 | 6.09E-07 | 3.50E-06 | 2.50E-02 | 7.68E-02 | MHO |
| CAG033 | 2.22E-04 | 1.02E-04 | 2.48E-04 | 7.62E-05 | 4.86E-05 | 1.28E-04 | MUO | 2.06E-04 | 1.19E-04 | 2.86E-04 | 1.49E-04 | 4.67E-03 | 5.16E-02 | MUO |
| CAG034 | 3.00E-05 | 1.51E-04 | 7.69E-06 | 2.20E-05 | 5.22E-04 | 7.49E-04 | MHO | 1.54E-05 | 4.17E-05 | 5.69E-06 | 1.94E-05 | 4.65E-01 | 7.15E-01 | MHO |
| CAG035 | 7.97E-05 | 2.02E-04 | 2.68E-05 | 7.01E-05 | 4.16E-06 | 4.87E-05 | MHO | 2.18E-04 | 5.91E-04 | 1.47E-04 | 2.38E-04 | 9.60E-01 | 9.79E-01 | MHO |
| CAG036 | 3.24E-05 | 9.75E-05 | 1.10E-05 | 5.48E-05 | 1.00E-04 | 2.14E-04 | MHO | 2.02E-05 | 6.57E-05 | 5.12E-06 | 2.94E-05 | 5.60E-02 | 1.34E-01 | MHO |
| CAG037 | 8.72E-05 | 1.88E-04 | 2.49E-05 | 7.78E-05 | 1.25E-03 | 1.38E-03 | MHO | 7.85E-05 | 1.89E-04 | 8.38E-06 | 3.19E-05 | 1.62E-02 | 6.95E-02 | MHO |
| CAG038 | 8.74E-05 | 2.40E-04 | 3.03E-05 | 7.13E-05 | 8.76E-05 | 2.08E-04 | MHO | 2.24E-04 | 4.91E-04 | 1.37E-04 | 2.28E-04 | 5.80E-01 | 8.32E-01 | MHO |
| CAG039 | 4.17E-05 | 1.13E-04 | 1.42E-04 | 4.12E-04 | 3.44E-04 | 5.92E-04 | MUO | 7.14E-05 | 2.09E-04 | 1.22E-04 | 2.68E-04 | 6.93E-01 | 8.51E-01 | MUO |
| CAG040 | 2.98E-05 | 8.99E-05 | 1.00E-05 | 5.86E-05 | 3.67E-04 | 6.07E-04 | MHO | 1.74E-05 | 3.82E-05 | 6.33E-07 | 3.64E-06 | 1.40E-02 | 6.95E-02 | MHO |
| CAG041 | 4.02E-05 | 2.47E-04 | 7.73E-05 | 1.94E-04 | 8.64E-04 | 1.06E-03 | MUO | 5.16E-05 | 1.20E-04 | 2.12E-04 | 3.70E-04 | 1.44E-02 | 6.95E-02 | MUO |
| CAG042 | 2.68E-04 | 1.07E-04 | 3.06E-04 | 9.46E-05 | 2.24E-05 | 8.00E-05 | MUO | 2.67E-04 | 1.54E-04 | 3.34E-04 | 1.68E-04 | 2.08E-02 | 7.68E-02 | MUO |
| CAG043 | 1.74E-05 | 5.09E-05 | 9.03E-05 | 4.20E-04 | 3.20E-04 | 5.73E-04 | MUO | 1.56E-05 | 4.35E-05 | 2.80E-05 | 7.22E-05 | 9.79E-01 | 9.79E-01 | MUO |

---

**Table S7. AUC results for each iteration**

| iteration | CQ tests dataset |           |        |      |      | QZ validation dataset |           |        |      |      |
|-----------|------------------|-----------|--------|------|------|-----------------------|-----------|--------|------|------|
|           | Accuracy         | Precision | Recall | F1   | roc  | Accuracy              | Precision | Recall | F1   | roc  |
| 1         | 0.61             | 0.63      | 0.71   | 0.67 | 0.66 | 0.64                  | 0.64      | 0.80   | 0.71 | 0.65 |
| 2         | 0.79             | 0.81      | 0.83   | 0.82 | 0.87 | 0.67                  | 0.65      | 0.85   | 0.74 | 0.73 |
| 3         | 0.66             | 0.71      | 0.65   | 0.68 | 0.73 | 0.63                  | 0.63      | 0.78   | 0.70 | 0.69 |
| 4         | 0.60             | 0.62      | 0.68   | 0.65 | 0.70 | 0.66                  | 0.64      | 0.88   | 0.74 | 0.66 |
| 5         | 0.68             | 0.70      | 0.74   | 0.72 | 0.78 | 0.66                  | 0.65      | 0.80   | 0.72 | 0.68 |
| 6         | 0.65             | 0.64      | 0.79   | 0.71 | 0.74 | 0.66                  | 0.64      | 0.88   | 0.74 | 0.67 |
| 7         | 0.70             | 0.70      | 0.80   | 0.75 | 0.81 | 0.64                  | 0.65      | 0.75   | 0.70 | 0.69 |
| 8         | 0.77             | 0.80      | 0.80   | 0.80 | 0.85 | 0.64                  | 0.65      | 0.78   | 0.70 | 0.70 |
| 9         | 0.66             | 0.71      | 0.65   | 0.68 | 0.71 | 0.67                  | 0.65      | 0.88   | 0.74 | 0.66 |
| 10        | 0.65             | 0.69      | 0.65   | 0.67 | 0.67 | 0.64                  | 0.63      | 0.85   | 0.72 | 0.69 |
| 11        | 0.66             | 0.68      | 0.74   | 0.70 | 0.70 | 0.64                  | 0.63      | 0.83   | 0.72 | 0.67 |
| 12        | 0.82             | 0.78      | 0.94   | 0.85 | 0.83 | 0.66                  | 0.64      | 0.88   | 0.74 | 0.65 |
| 13        | 0.62             | 0.66      | 0.68   | 0.67 | 0.67 | 0.71                  | 0.69      | 0.88   | 0.77 | 0.69 |
| 14        | 0.73             | 0.75      | 0.77   | 0.76 | 0.78 | 0.71                  | 0.70      | 0.83   | 0.76 | 0.75 |
| 15        | 0.71             | 0.73      | 0.77   | 0.75 | 0.76 | 0.62                  | 0.61      | 0.83   | 0.70 | 0.69 |
| 16        | 0.66             | 0.69      | 0.71   | 0.70 | 0.71 | 0.66                  | 0.65      | 0.83   | 0.73 | 0.72 |
| 17        | 0.73             | 0.73      | 0.83   | 0.77 | 0.79 | 0.62                  | 0.62      | 0.80   | 0.70 | 0.66 |
| 18        | 0.74             | 0.73      | 0.85   | 0.78 | 0.81 | 0.66                  | 0.64      | 0.88   | 0.74 | 0.64 |
| 19        | 0.67             | 0.72      | 0.68   | 0.70 | 0.71 | 0.66                  | 0.66      | 0.78   | 0.71 | 0.68 |
| 20        | 0.69             | 0.71      | 0.77   | 0.74 | 0.77 | 0.66                  | 0.64      | 0.88   | 0.74 | 0.69 |
| 21        | 0.69             | 0.67      | 0.85   | 0.75 | 0.77 | 0.66                  | 0.65      | 0.83   | 0.73 | 0.68 |
| 22        | 0.66             | 0.73      | 0.63   | 0.68 | 0.77 | 0.62                  | 0.63      | 0.73   | 0.67 | 0.70 |
| 23        | 0.74             | 0.74      | 0.82   | 0.78 | 0.81 | 0.66                  | 0.64      | 0.85   | 0.73 | 0.67 |
| 24        | 0.67             | 0.71      | 0.69   | 0.70 | 0.72 | 0.64                  | 0.63      | 0.85   | 0.72 | 0.69 |
| 25        | 0.69             | 0.70      | 0.76   | 0.73 | 0.72 | 0.68                  | 0.66      | 0.88   | 0.75 | 0.71 |
| 26        | 0.73             | 0.75      | 0.77   | 0.76 | 0.78 | 0.67                  | 0.66      | 0.83   | 0.73 | 0.67 |
| 27        | 0.67             | 0.69      | 0.71   | 0.70 | 0.69 | 0.66                  | 0.64      | 0.88   | 0.74 | 0.68 |
| 28        | 0.69             | 0.74      | 0.68   | 0.71 | 0.71 | 0.66                  | 0.65      | 0.83   | 0.73 | 0.73 |
| 29        | 0.69             | 0.71      | 0.74   | 0.72 | 0.79 | 0.63                  | 0.64      | 0.75   | 0.69 | 0.67 |
| 30        | 0.69             | 0.68      | 0.82   | 0.75 | 0.83 | 0.60                  | 0.61      | 0.78   | 0.68 | 0.71 |
| 31        | 0.61             | 0.63      | 0.71   | 0.67 | 0.67 | 0.68                  | 0.67      | 0.83   | 0.74 | 0.71 |
| 32        | 0.75             | 0.74      | 0.83   | 0.78 | 0.73 | 0.64                  | 0.63      | 0.83   | 0.72 | 0.69 |
| 33        | 0.69             | 0.70      | 0.76   | 0.73 | 0.81 | 0.62                  | 0.63      | 0.73   | 0.67 | 0.66 |
| 34        | 0.67             | 0.68      | 0.77   | 0.72 | 0.72 | 0.64                  | 0.63      | 0.88   | 0.73 | 0.68 |
| 35        | 0.67             | 0.75      | 0.62   | 0.68 | 0.76 | 0.66                  | 0.65      | 0.83   | 0.73 | 0.69 |
| 36        | 0.60             | 0.63      | 0.65   | 0.64 | 0.67 | 0.62                  | 0.62      | 0.78   | 0.69 | 0.65 |
| 37        | 0.77             | 0.78      | 0.82   | 0.80 | 0.84 | 0.66                  | 0.64      | 0.85   | 0.73 | 0.70 |
| 38        | 0.69             | 0.74      | 0.68   | 0.71 | 0.76 | 0.67                  | 0.65      | 0.85   | 0.74 | 0.69 |
| 39        | 0.71             | 0.72      | 0.80   | 0.76 | 0.77 | 0.68                  | 0.67      | 0.83   | 0.74 | 0.69 |
| 40        | 0.66             | 0.68      | 0.77   | 0.72 | 0.75 | 0.67                  | 0.65      | 0.88   | 0.74 | 0.71 |
| 41        | 0.65             | 0.64      | 0.79   | 0.71 | 0.70 | 0.66                  | 0.64      | 0.88   | 0.74 | 0.68 |
| 42        | 0.68             | 0.71      | 0.71   | 0.71 | 0.77 | 0.63                  | 0.63      | 0.80   | 0.70 | 0.69 |
| 43        | 0.72             | 0.73      | 0.79   | 0.76 | 0.79 | 0.66                  | 0.65      | 0.80   | 0.72 | 0.71 |
| 44        | 0.79             | 0.80      | 0.82   | 0.81 | 0.86 | 0.63                  | 0.63      | 0.78   | 0.70 | 0.68 |
| 45        | 0.62             | 0.66      | 0.66   | 0.66 | 0.65 | 0.67                  | 0.66      | 0.83   | 0.73 | 0.69 |



|             |             |             |             |             |             |             |             |             |             |             |
|-------------|-------------|-------------|-------------|-------------|-------------|-------------|-------------|-------------|-------------|-------------|
| 46          | 0.68        | 0.73        | 0.65        | 0.69        | 0.75        | 0.60        | 0.61        | 0.78        | 0.68        | 0.66        |
| 47          | 0.68        | 0.73        | 0.69        | 0.71        | 0.75        | 0.68        | 0.67        | 0.83        | 0.74        | 0.71        |
| 48          | 0.75        | 0.76        | 0.80        | 0.78        | 0.80        | 0.64        | 0.63        | 0.85        | 0.72        | 0.66        |
| 49          | 0.70        | 0.72        | 0.76        | 0.74        | 0.76        | 0.70        | 0.67        | 0.88        | 0.76        | 0.67        |
| 50          | 0.75        | 0.73        | 0.88        | 0.80        | 0.78        | 0.63        | 0.62        | 0.83        | 0.71        | 0.67        |
| <b>Mean</b> | <b>0.69</b> | <b>0.71</b> | <b>0.75</b> | <b>0.73</b> | <b>0.75</b> | <b>0.65</b> | <b>0.64</b> | <b>0.83</b> | <b>0.72</b> | <b>0.69</b> |
